# Supplementary figures and images for: Assay of cardiopulmonary bypass system for porcine alveolar macrophages removing GFP-E. coli from erythrocyte surfaces
Source: PeerJ journal article supplement (doi:10.7717/peerj.18934), 2025-03-04

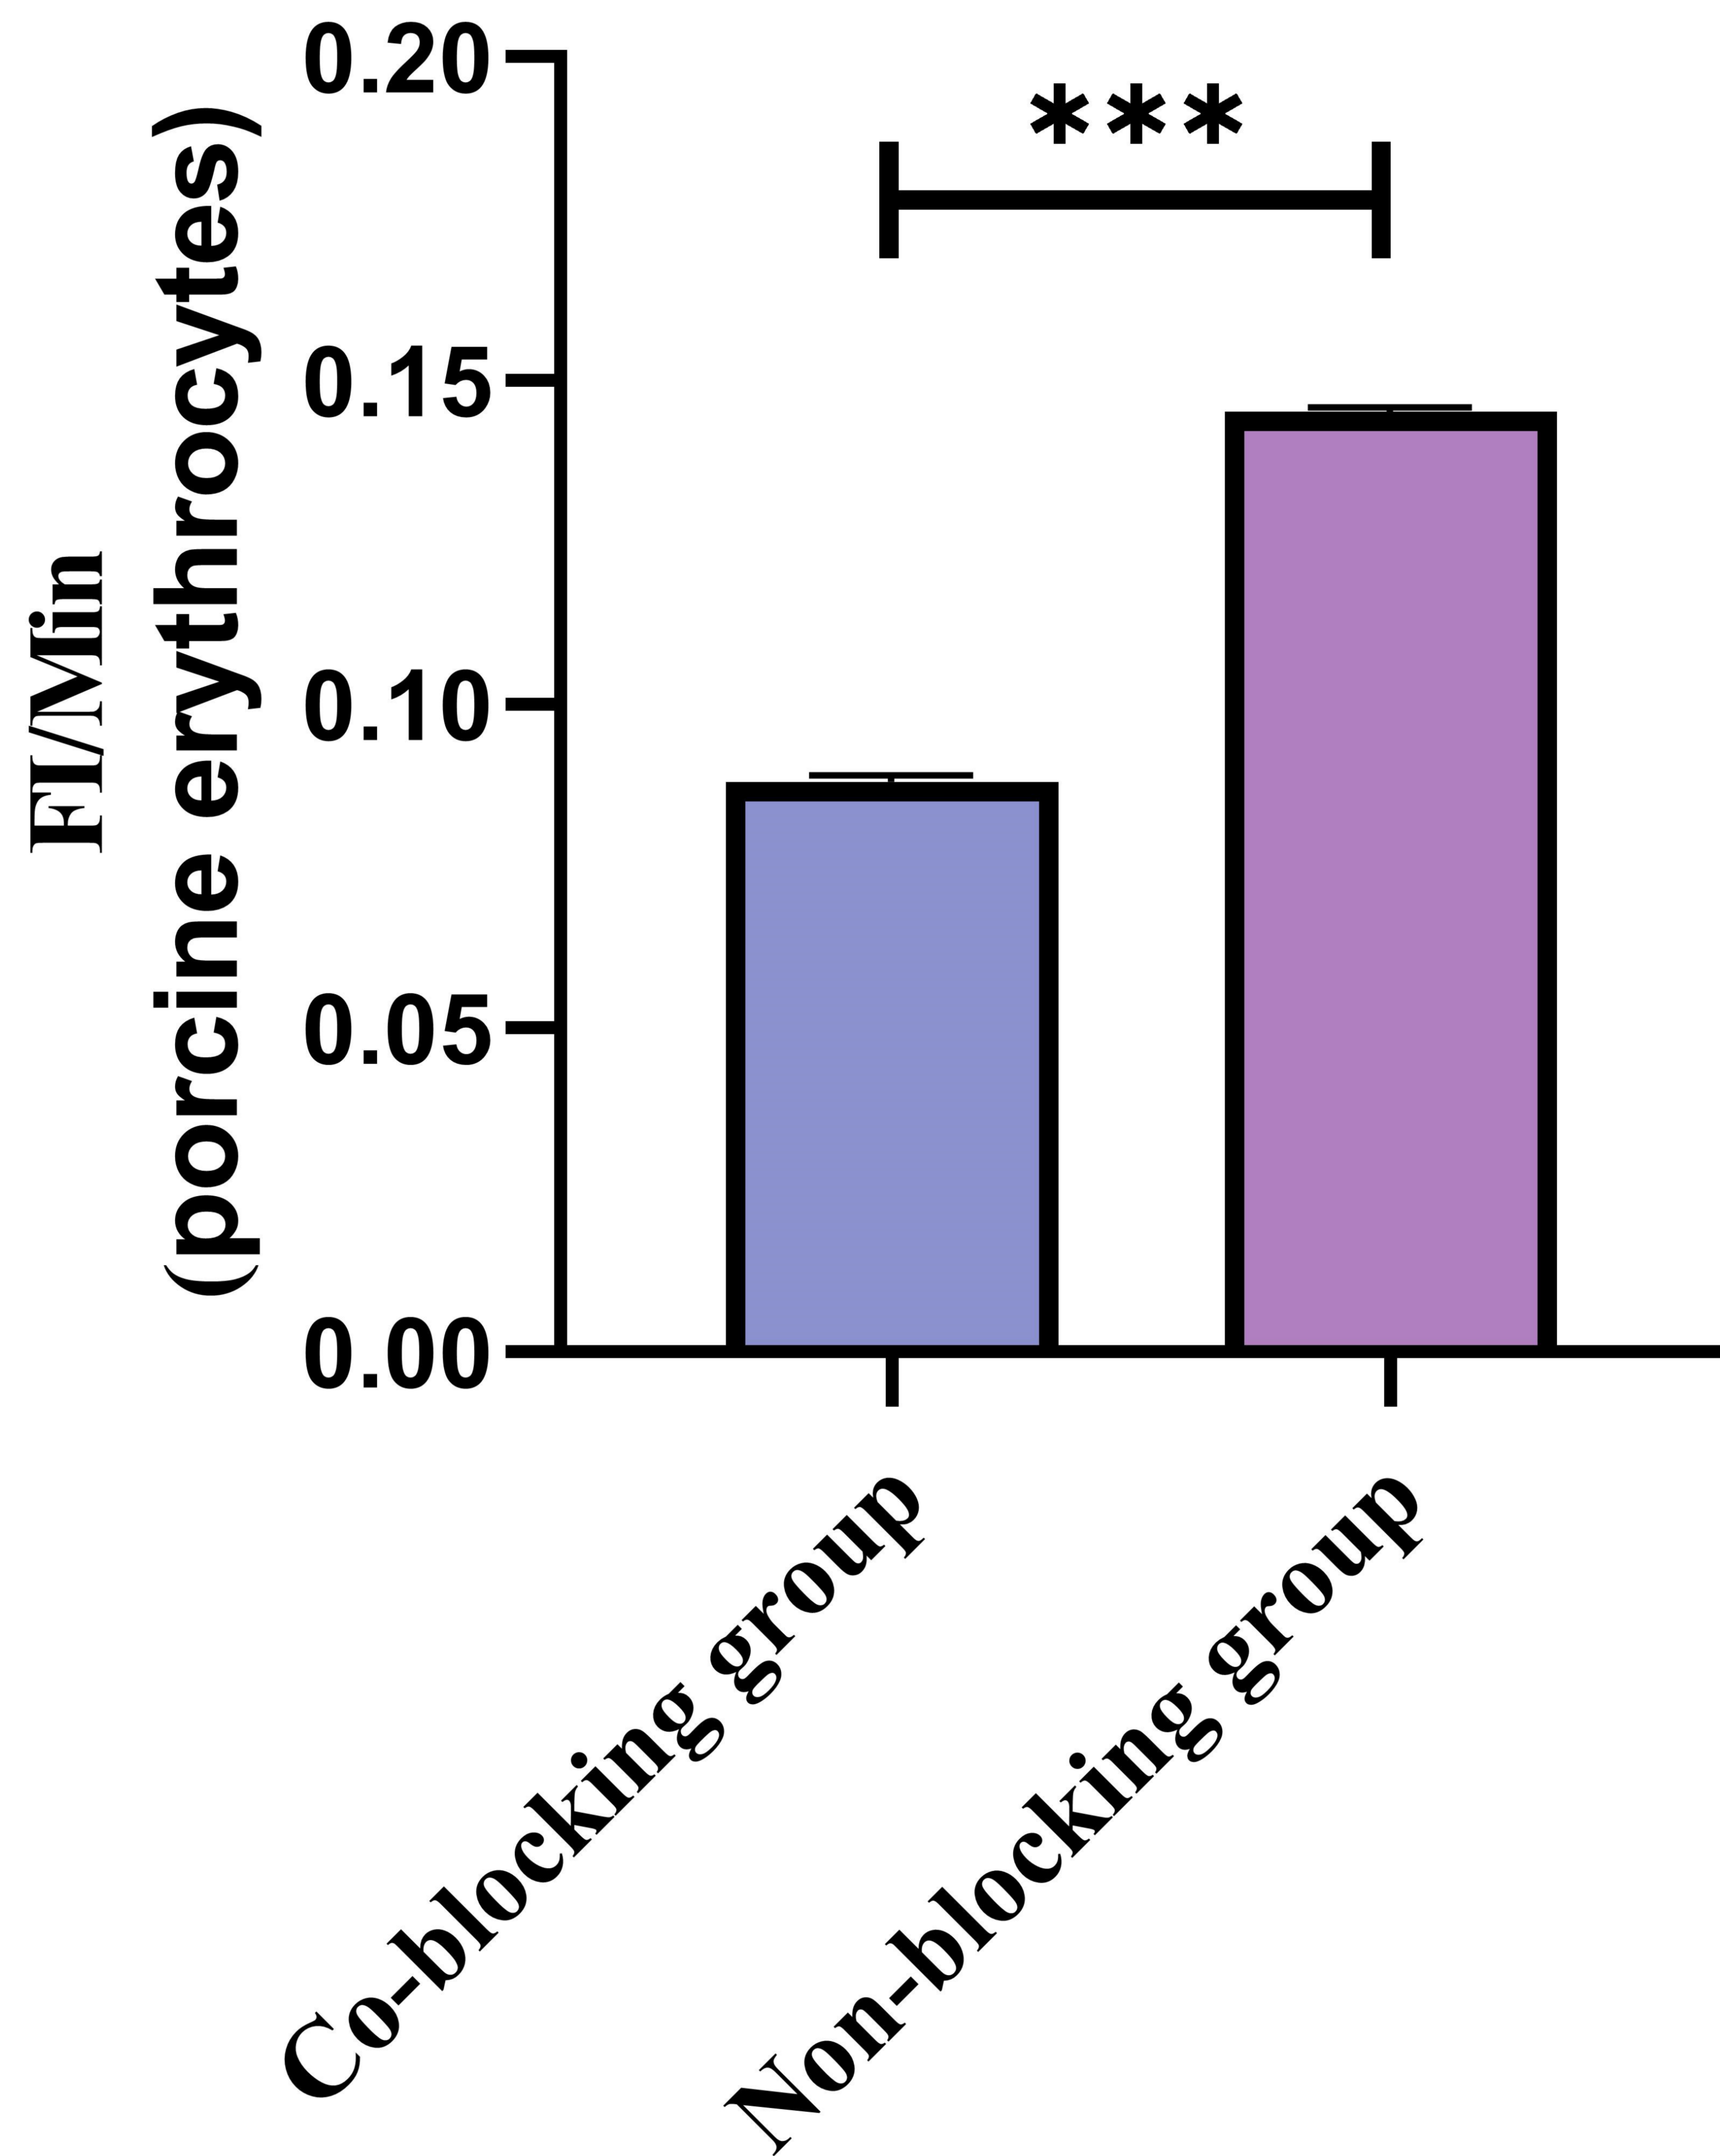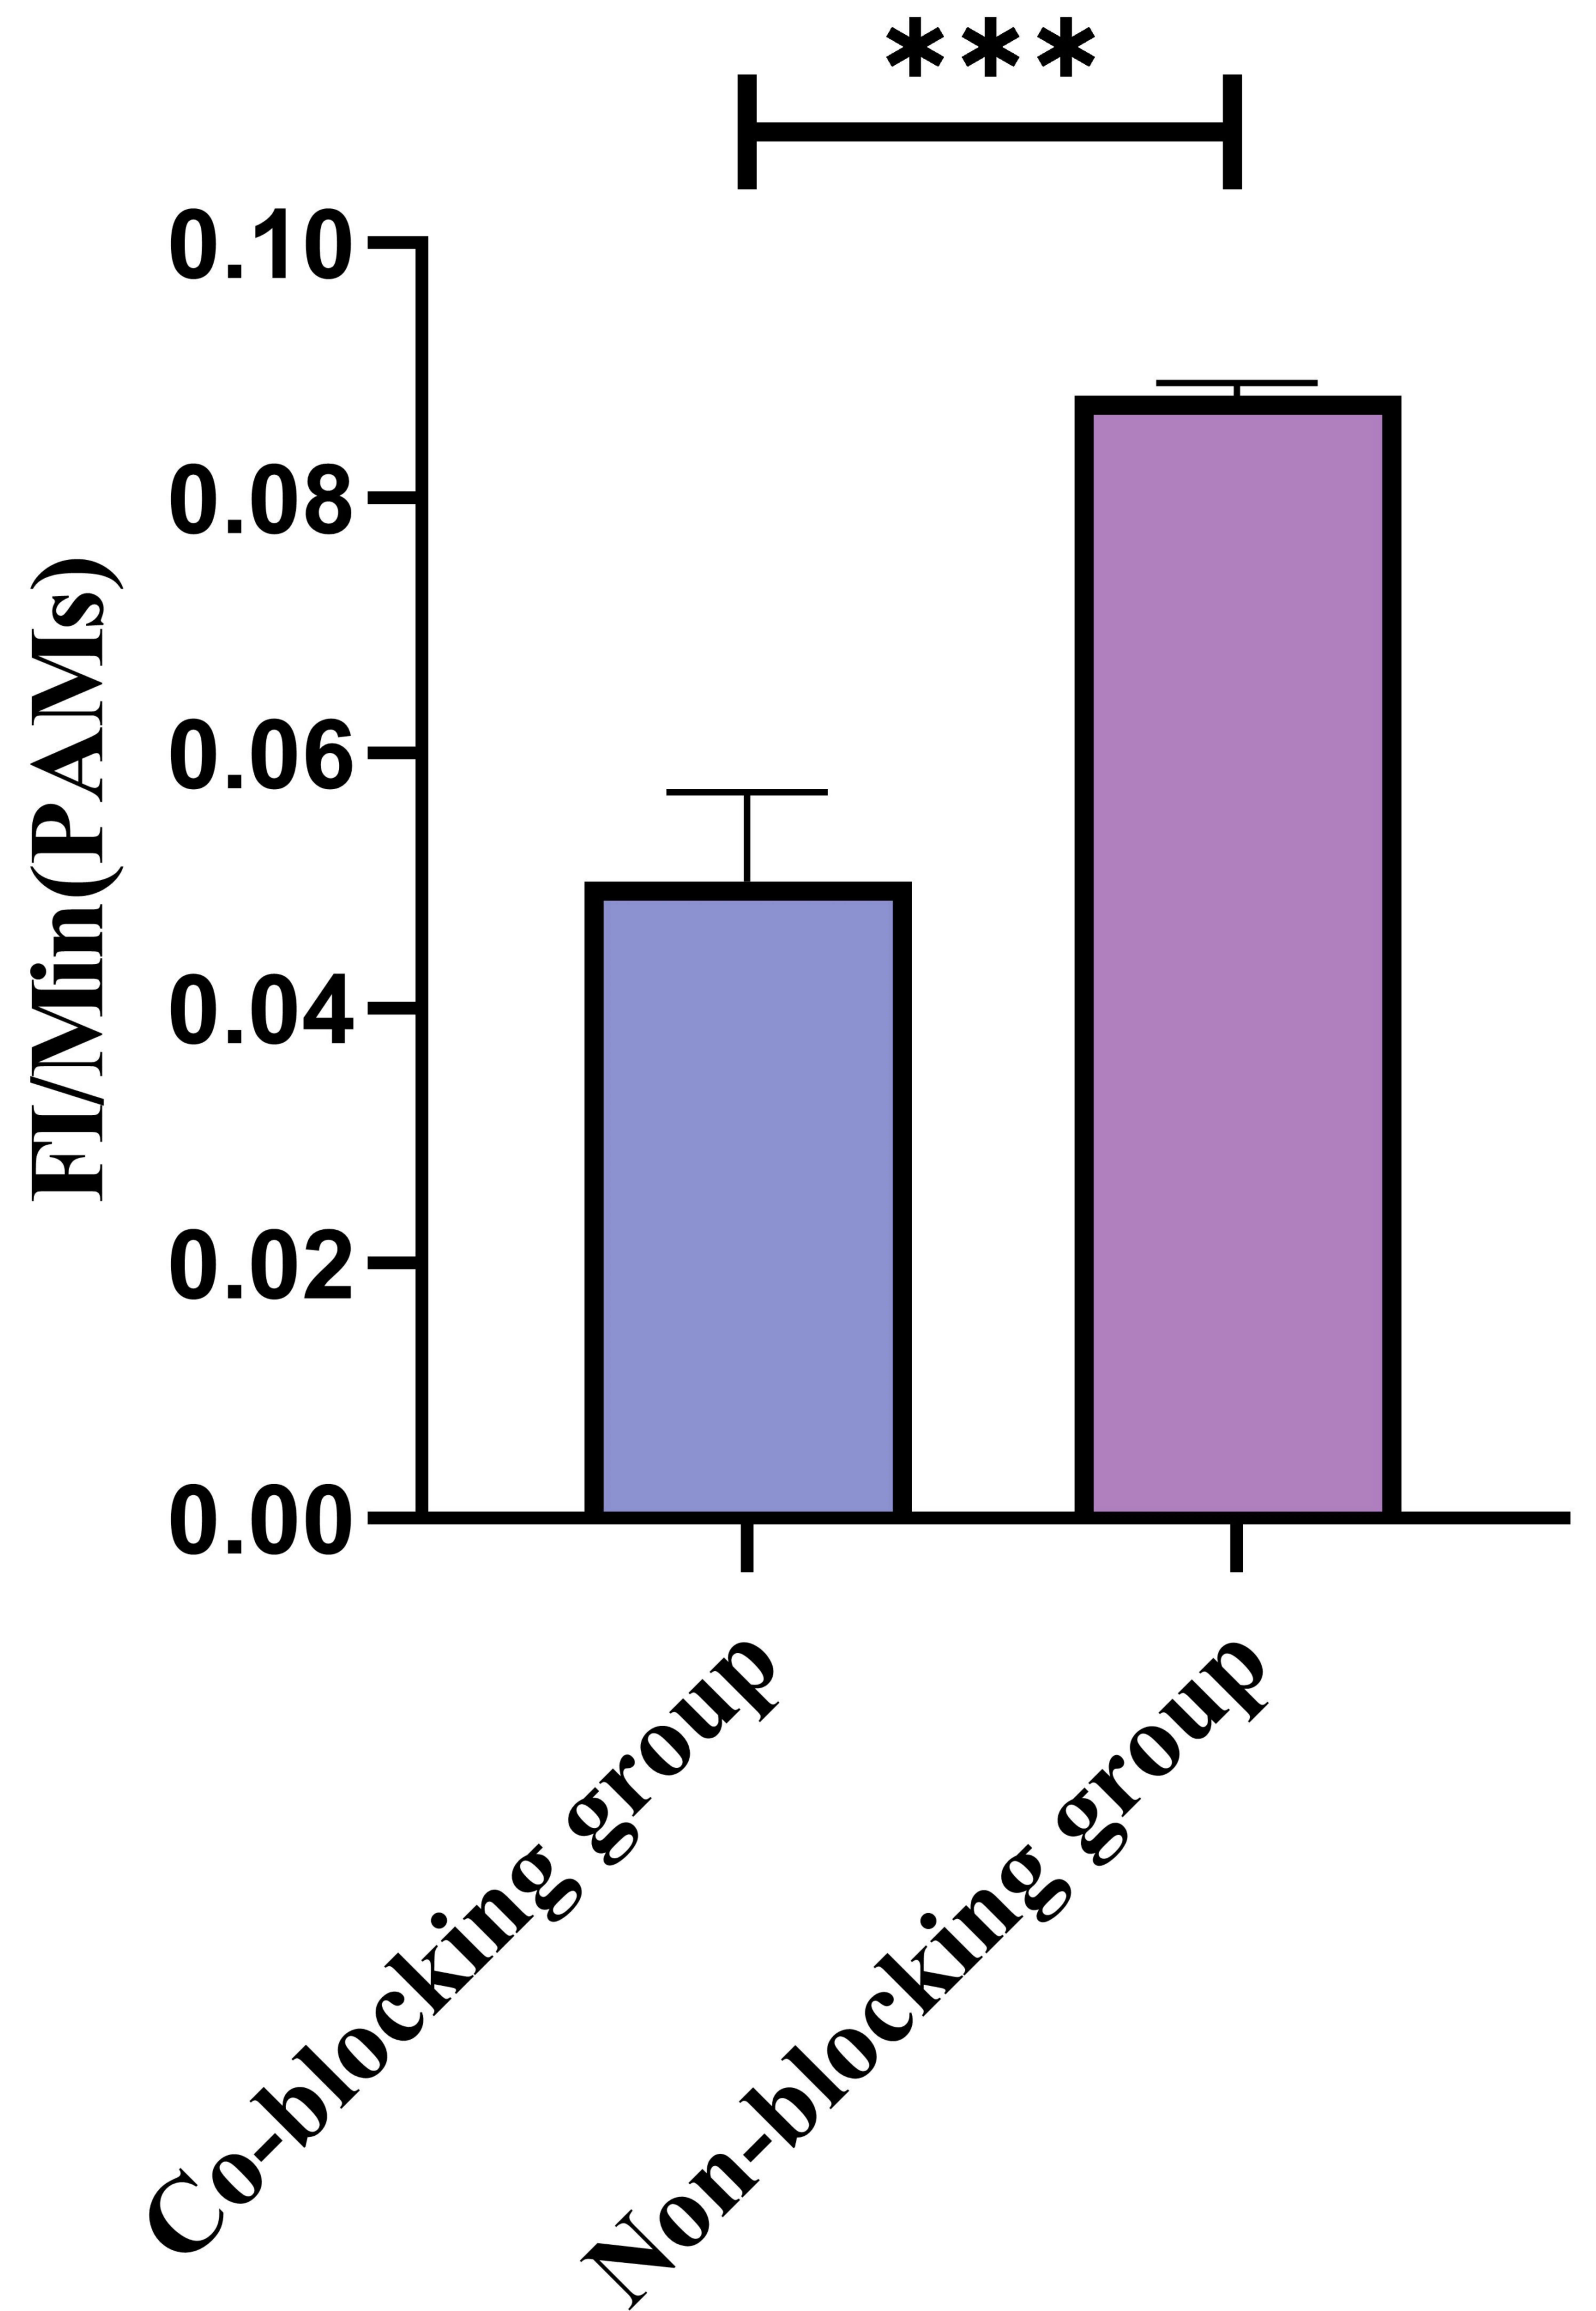

Supplement: Picture_supplement.zip [file Picture_supplement.zip]

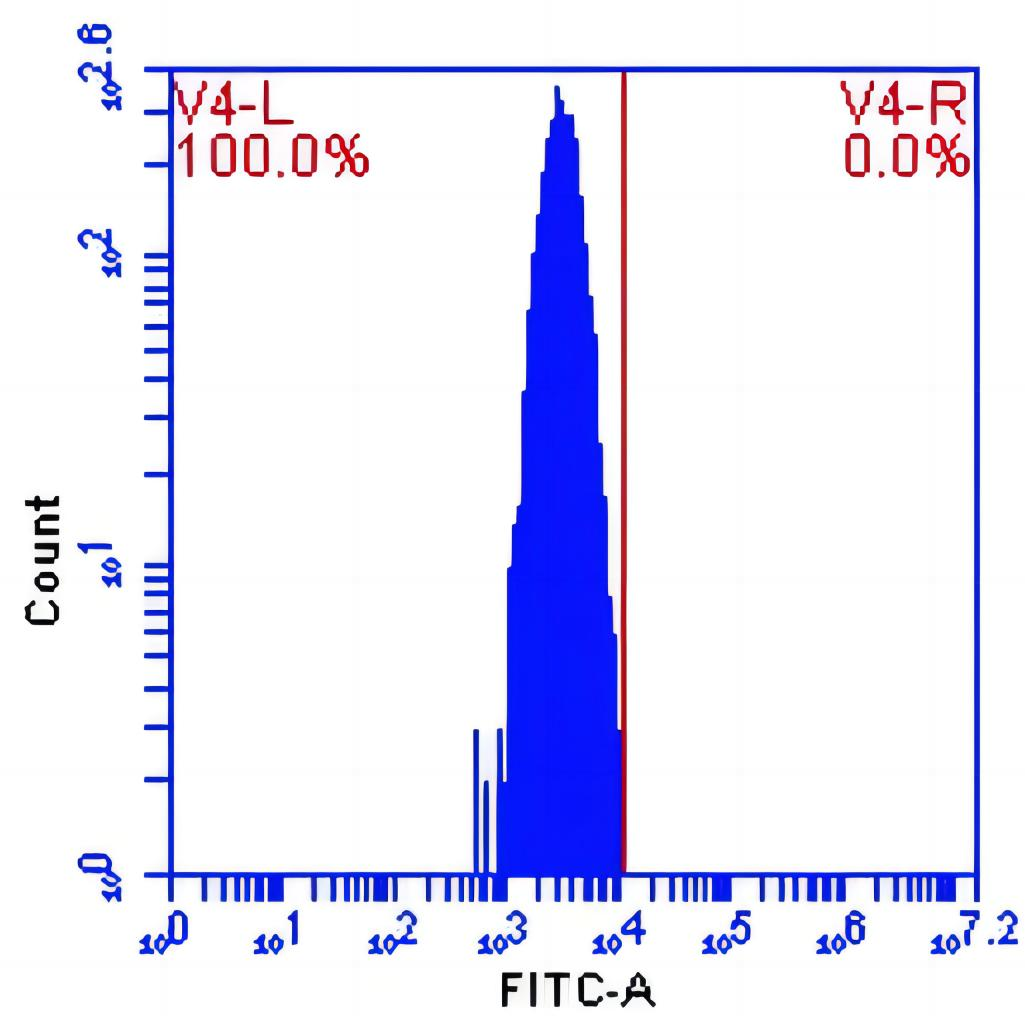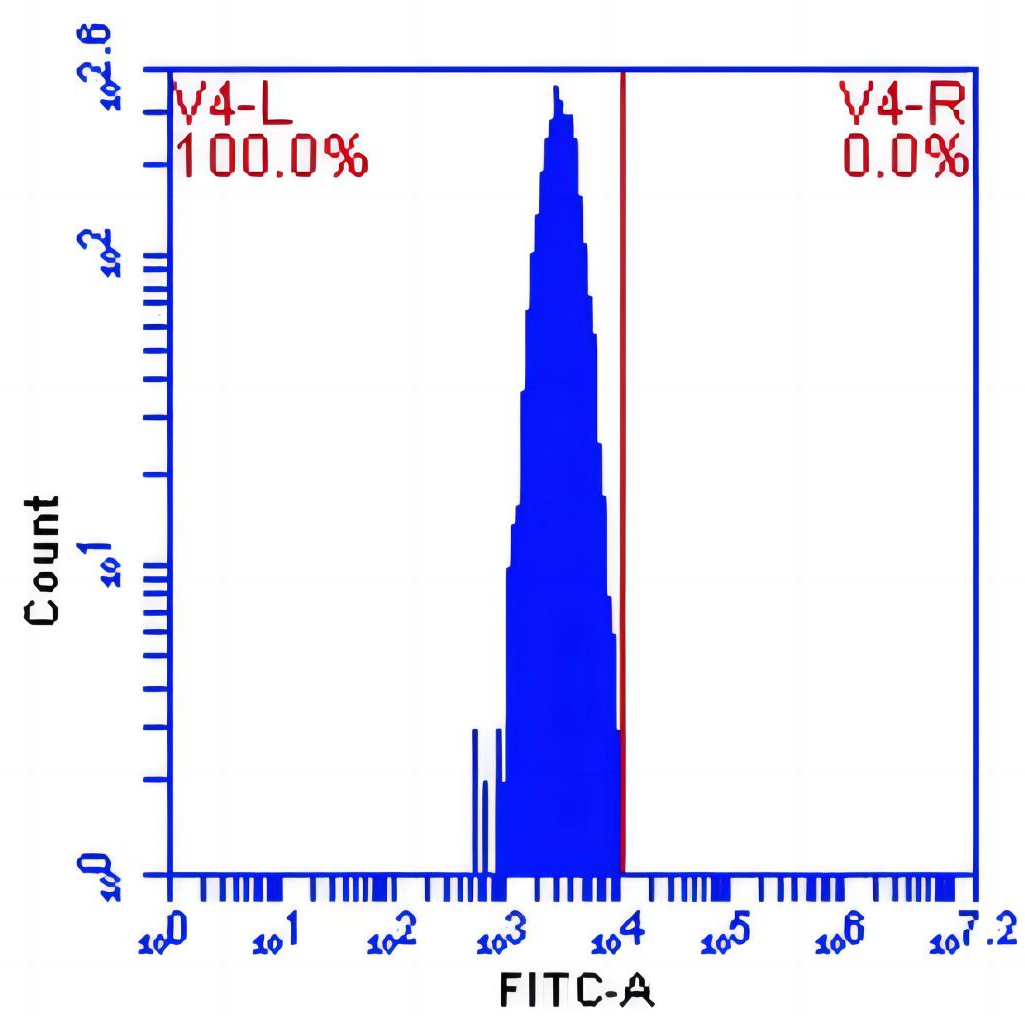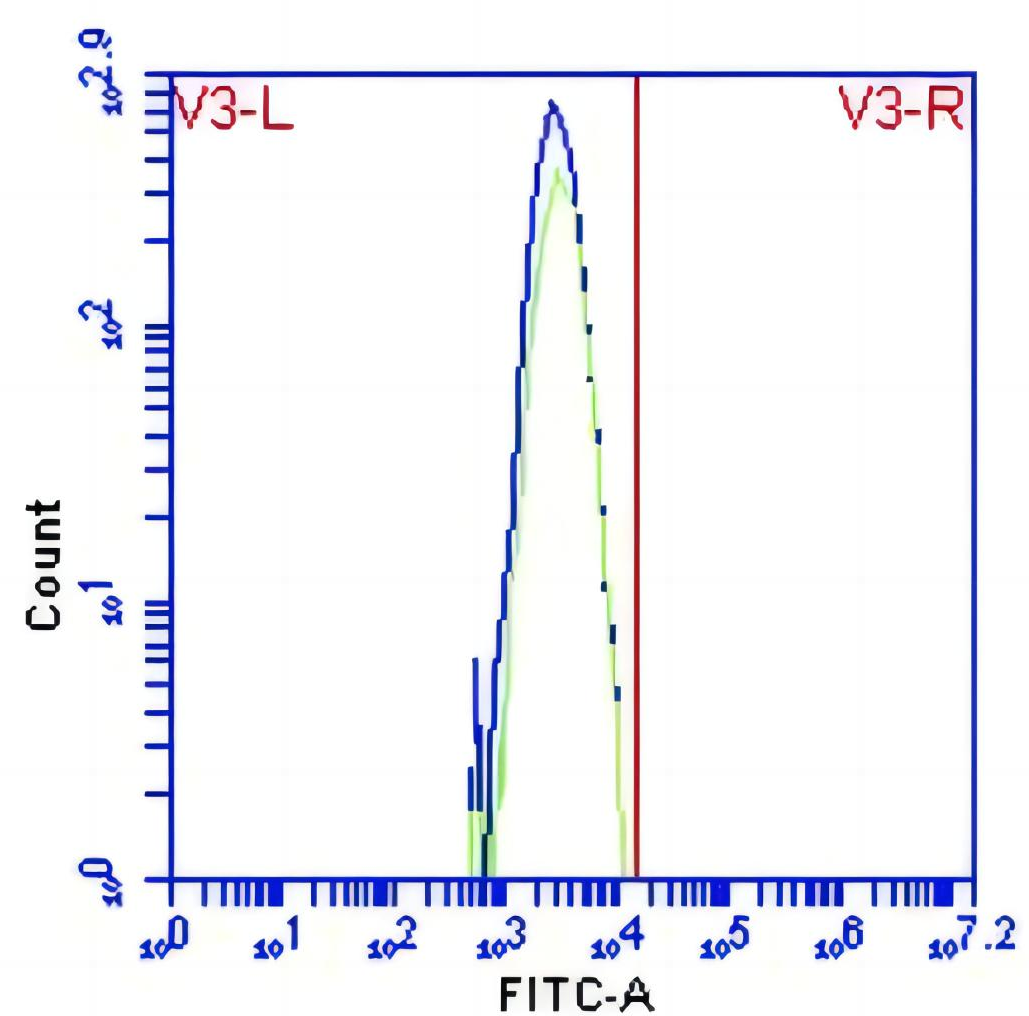

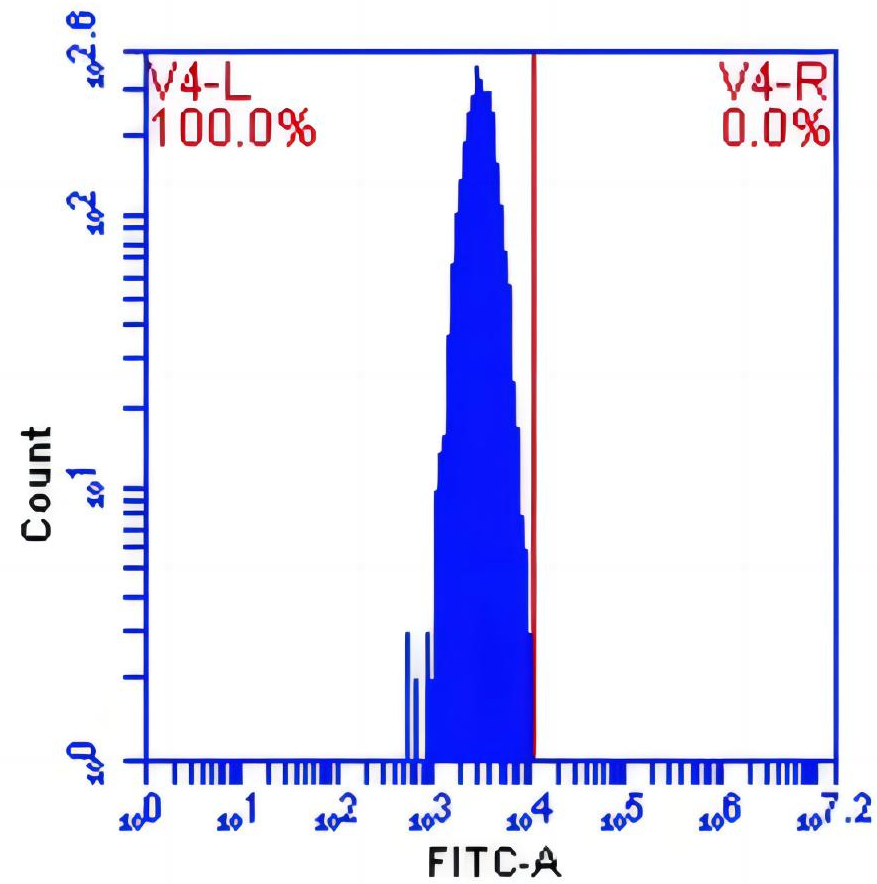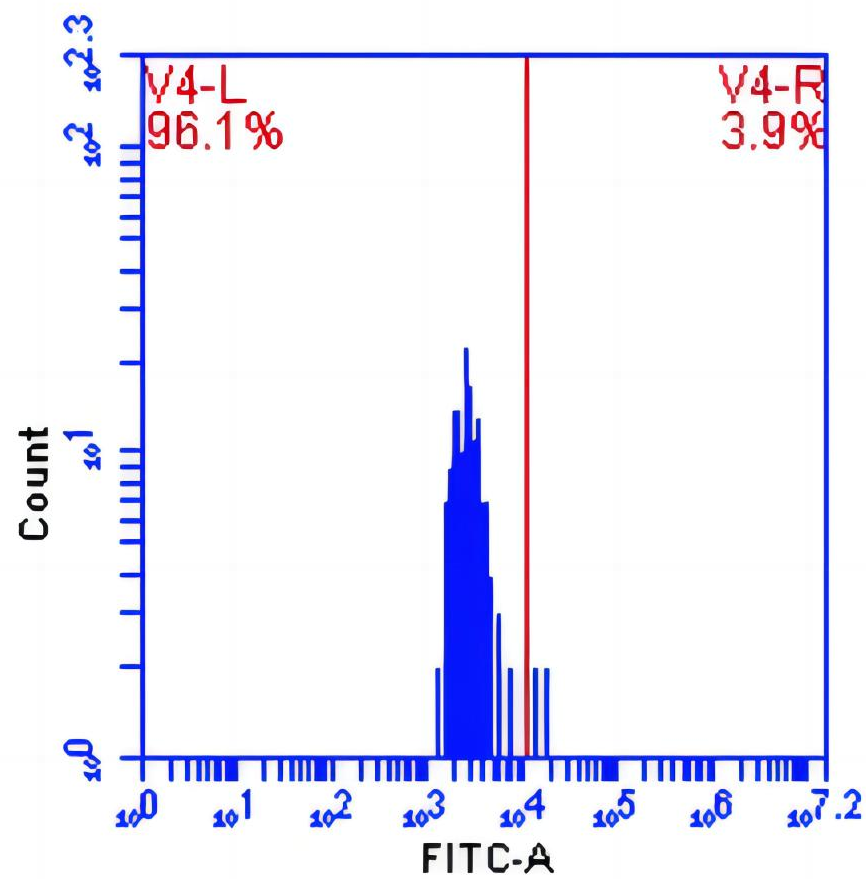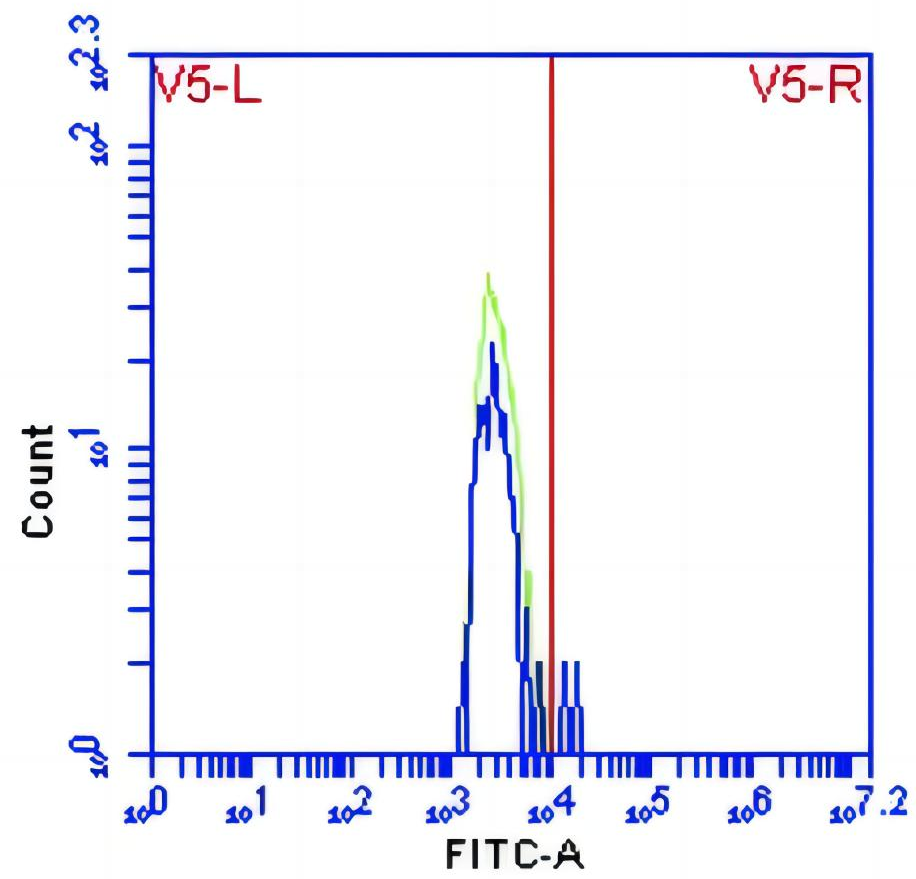

Supplement: Picture_supplement.zip [file Picture_supplement.zip]

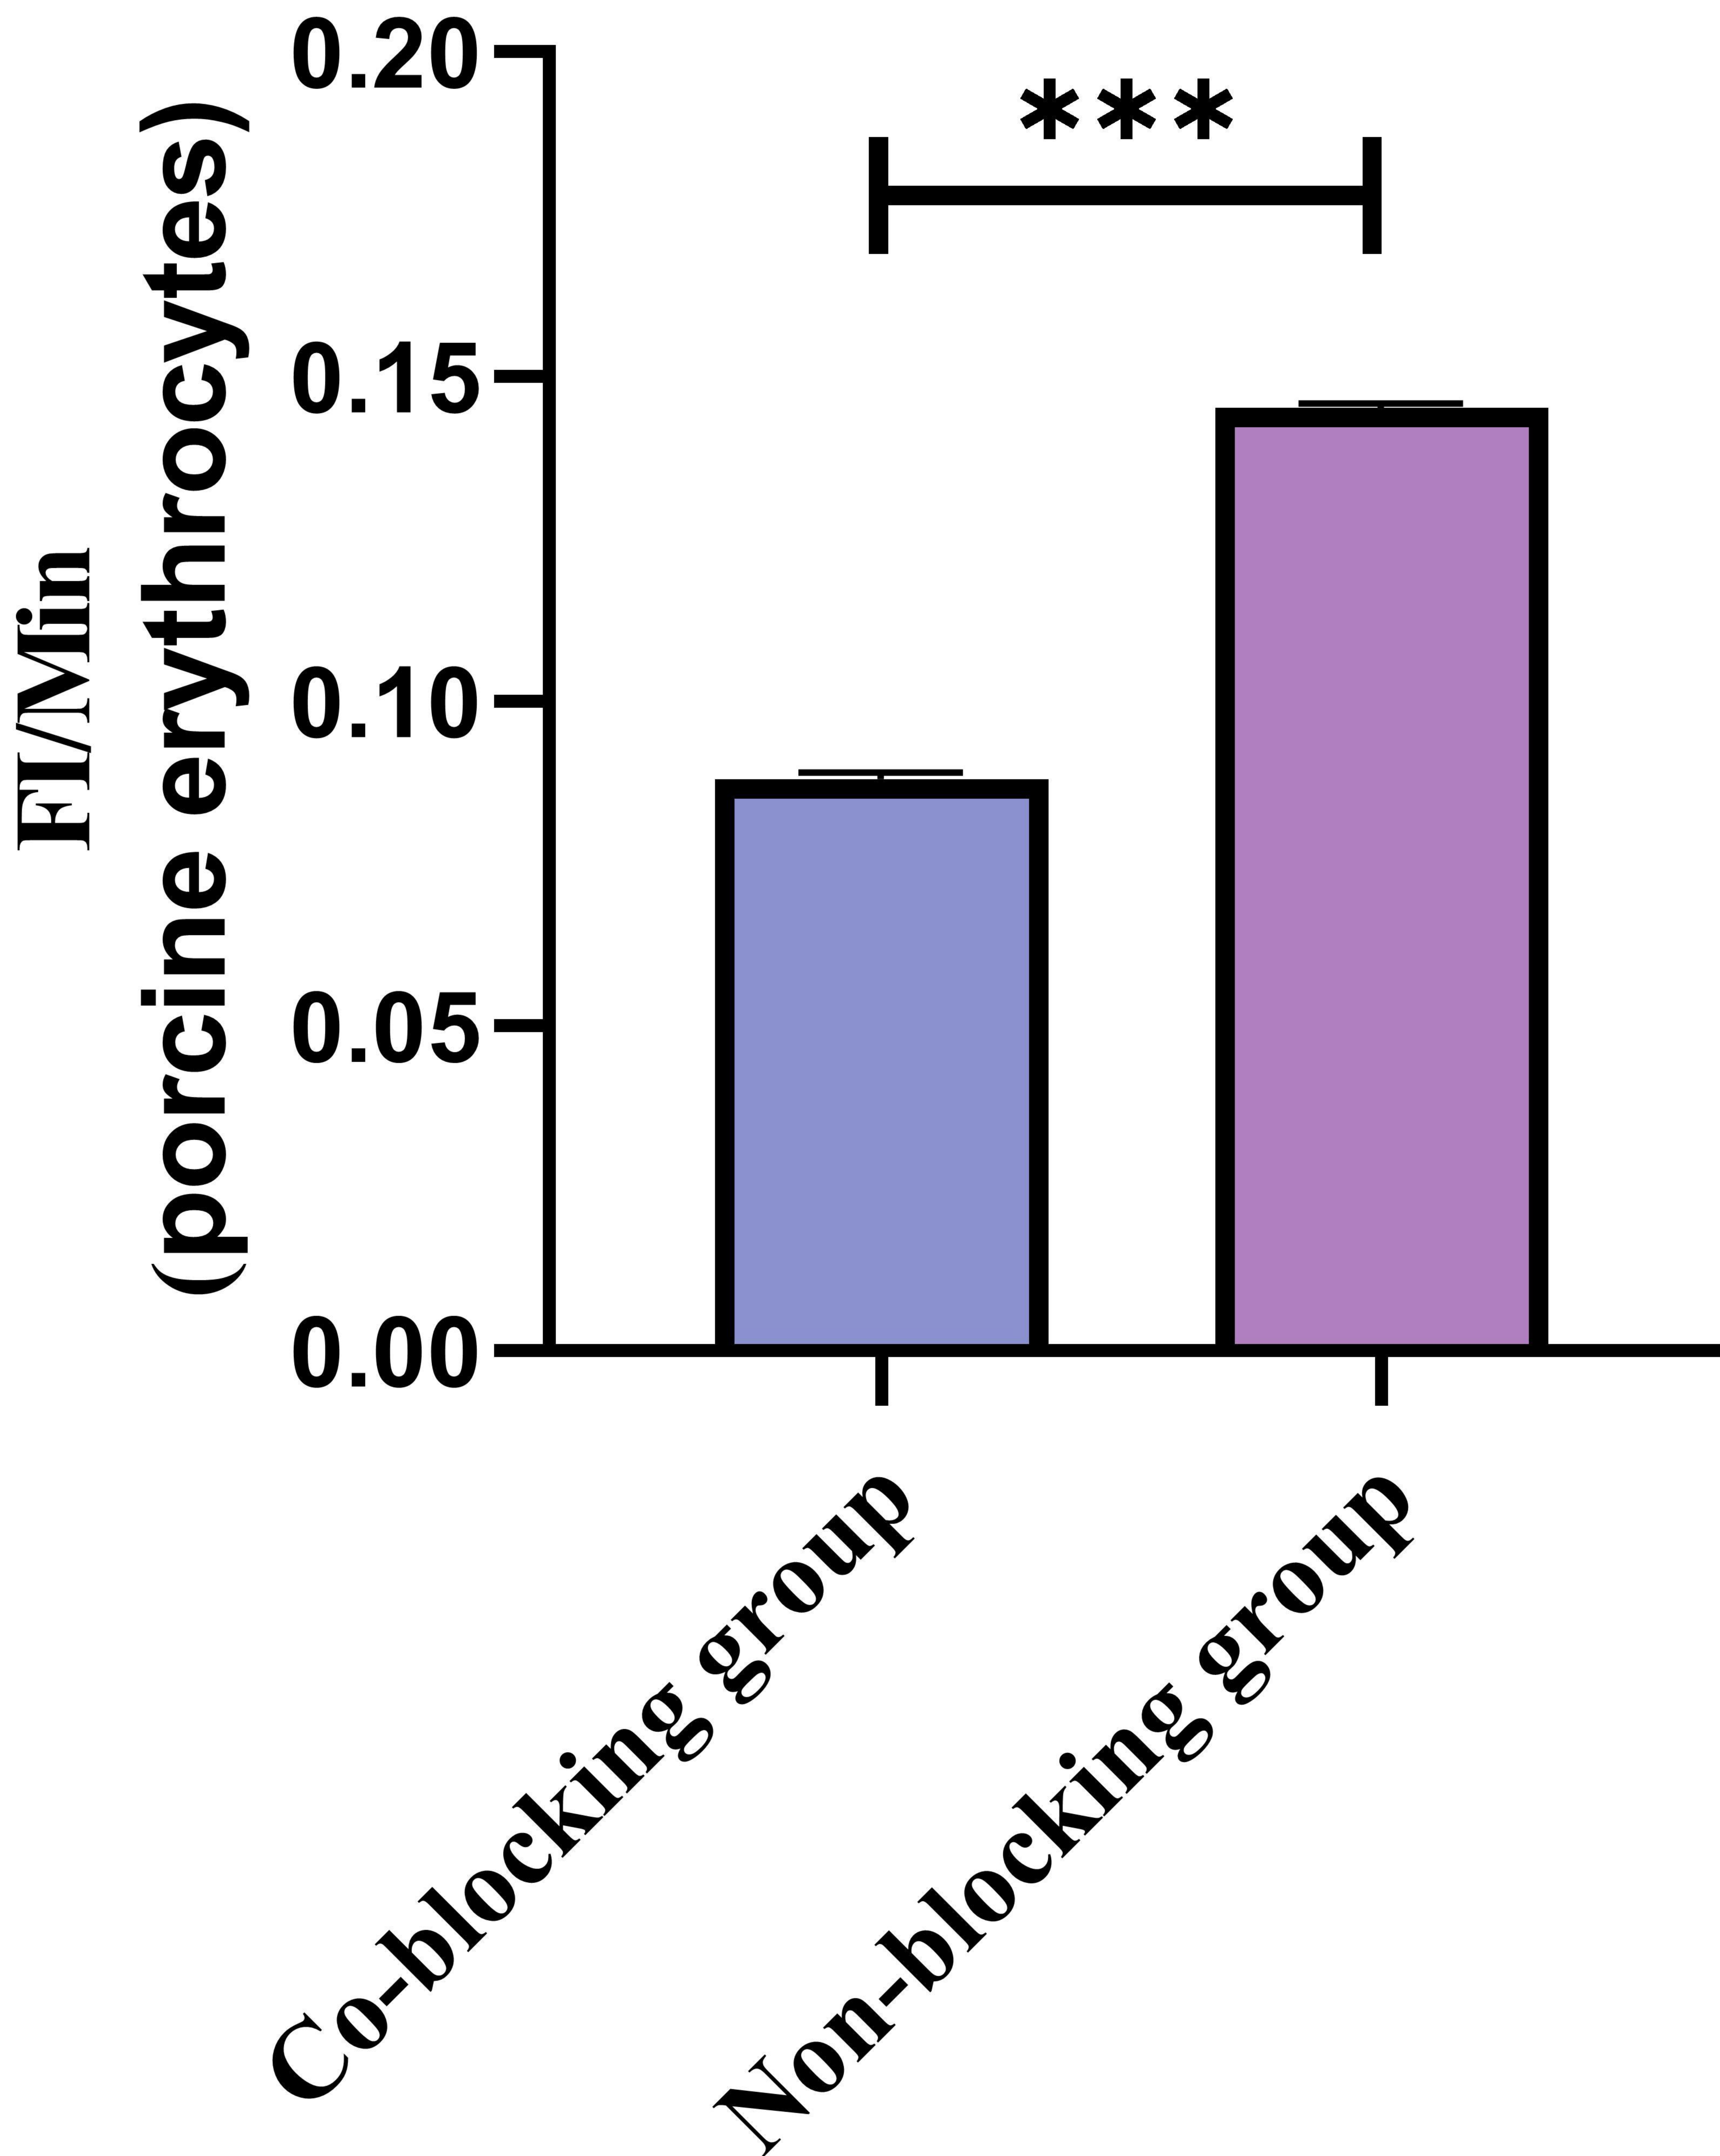

Supplement: Picture_supplement.zip [file Picture_supplement.zip]

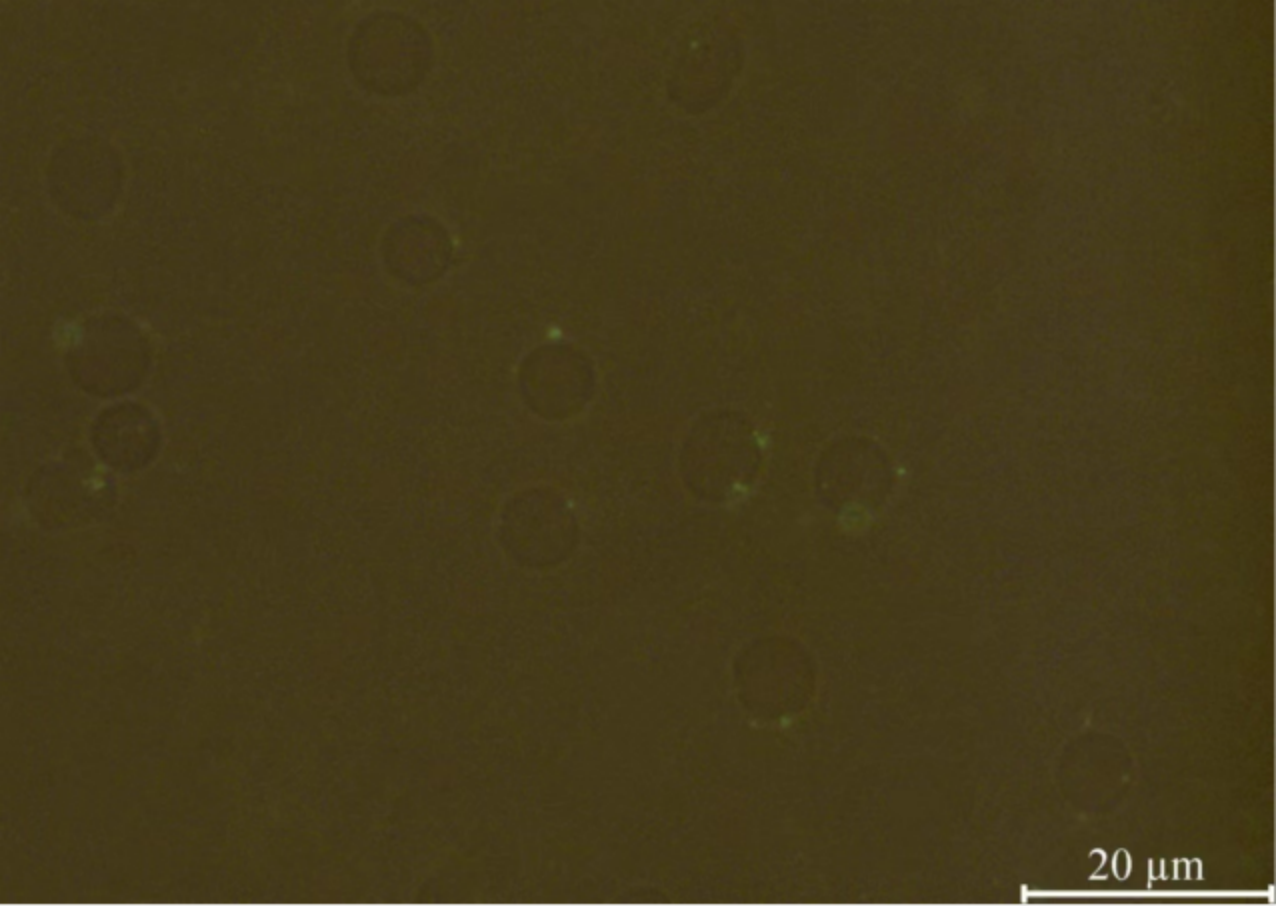

20  $\mu\text{m}$

Supplement: Picture_supplement.zip [file Picture_supplement.zip]

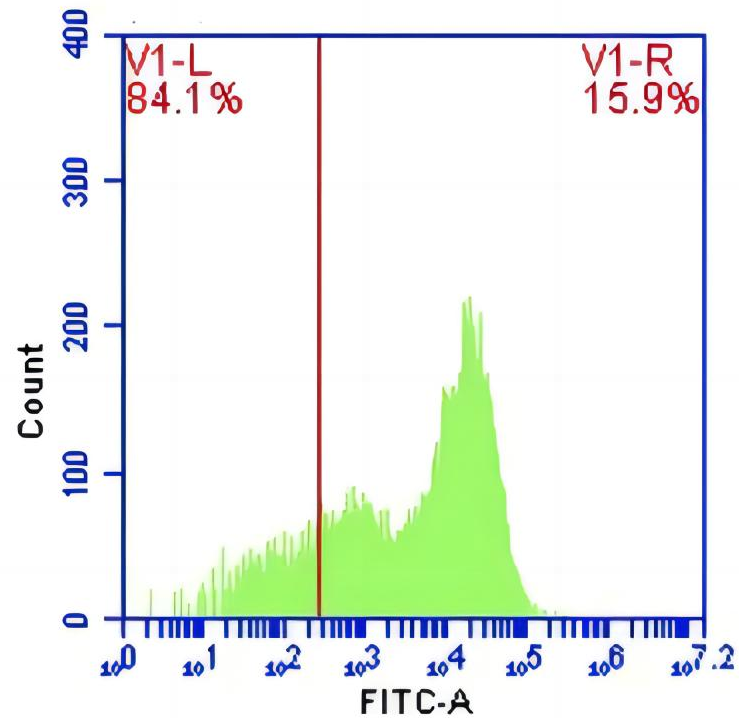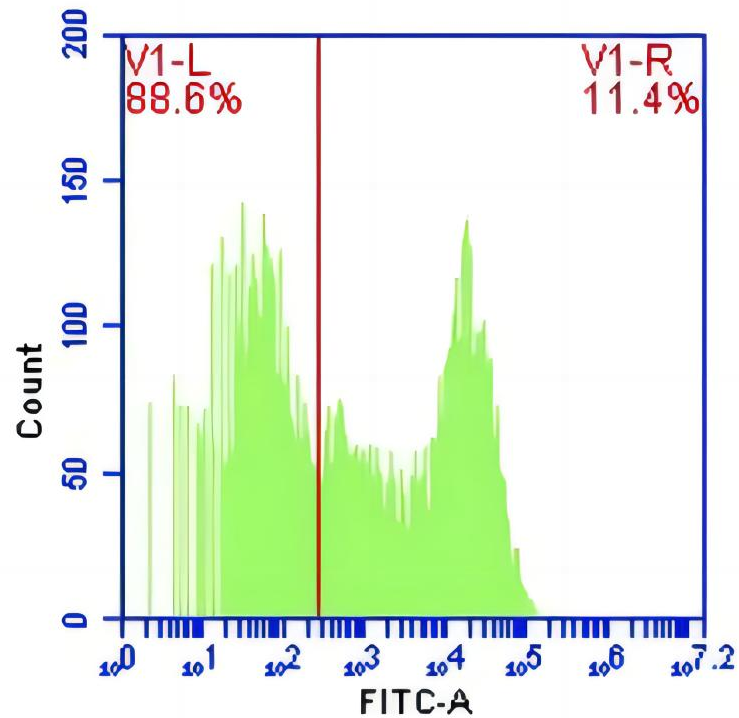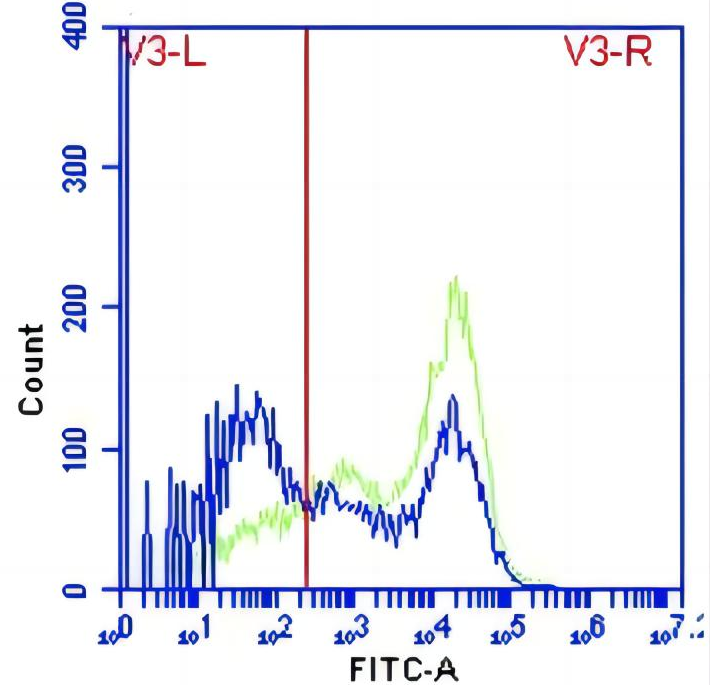

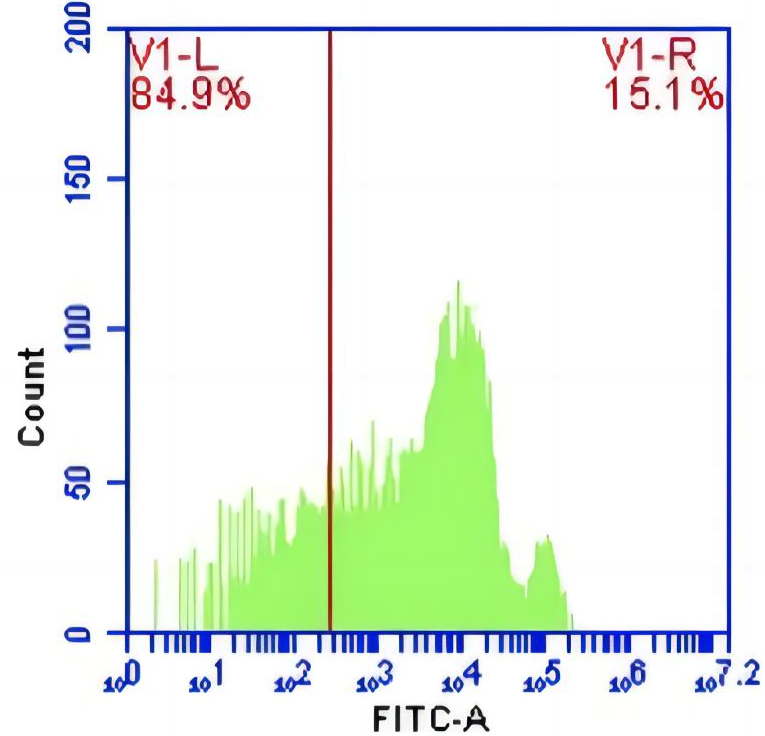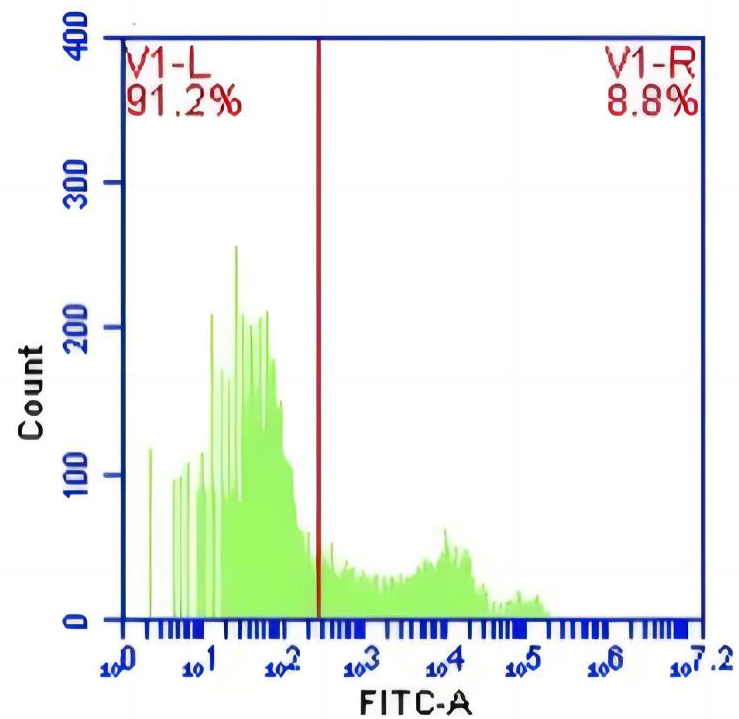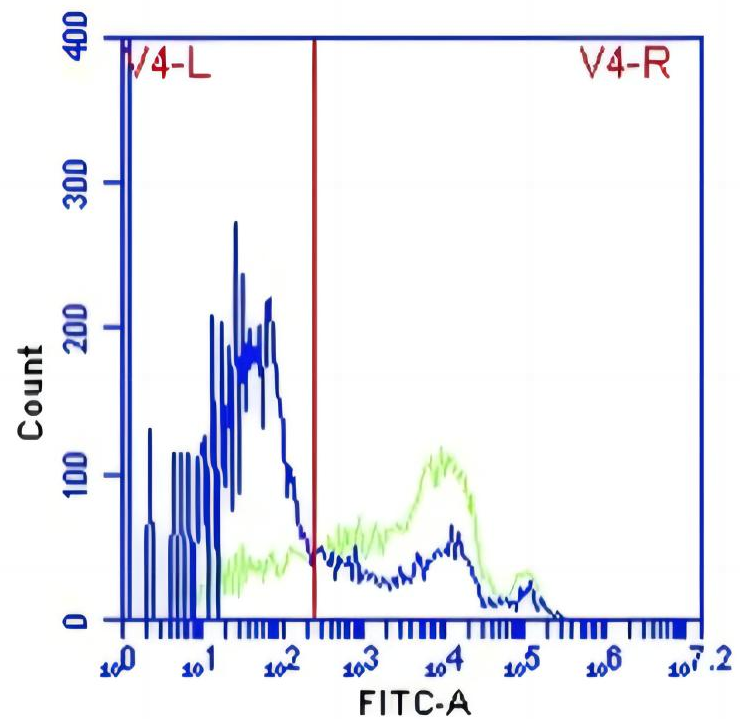

Supplement: Picture_supplement.zip [file Picture_supplement.zip]

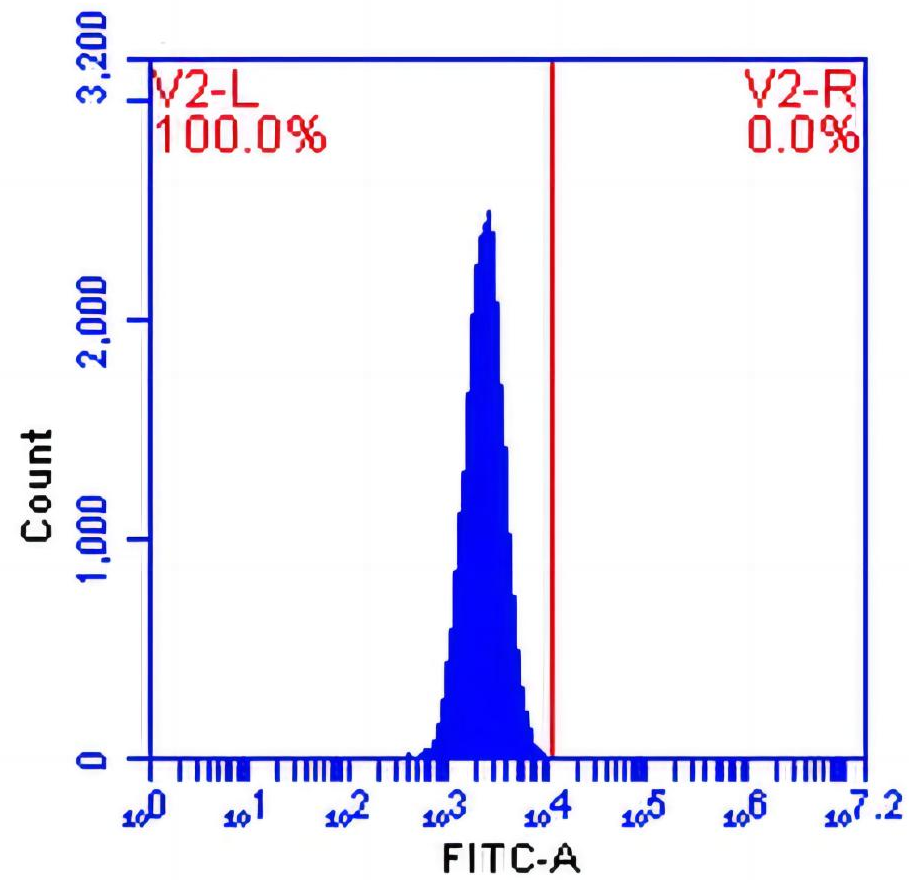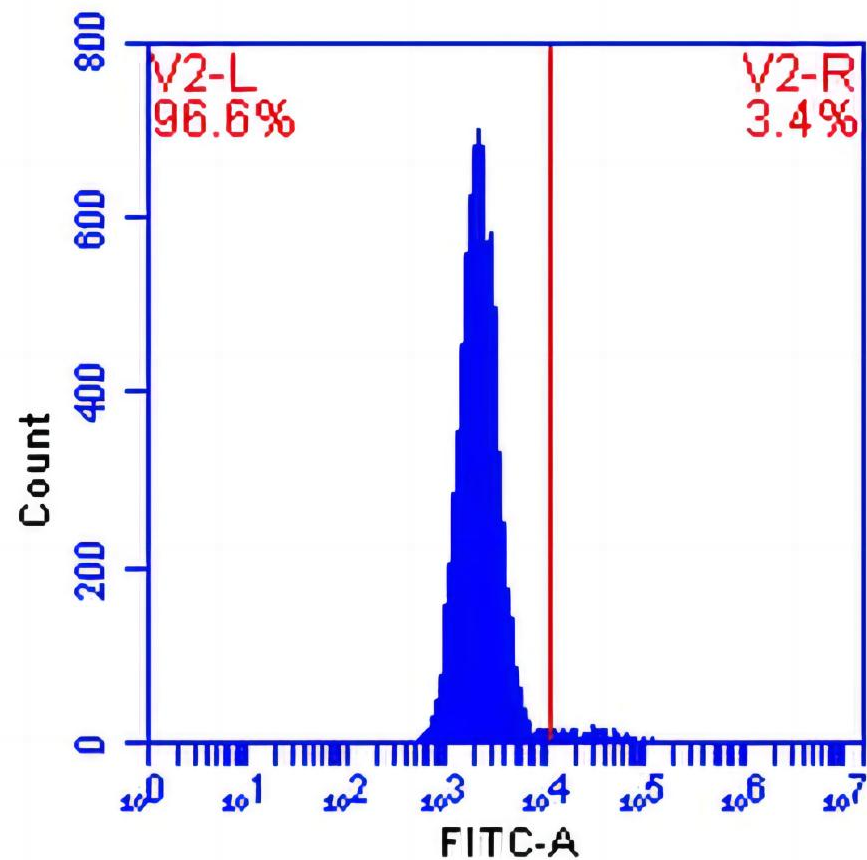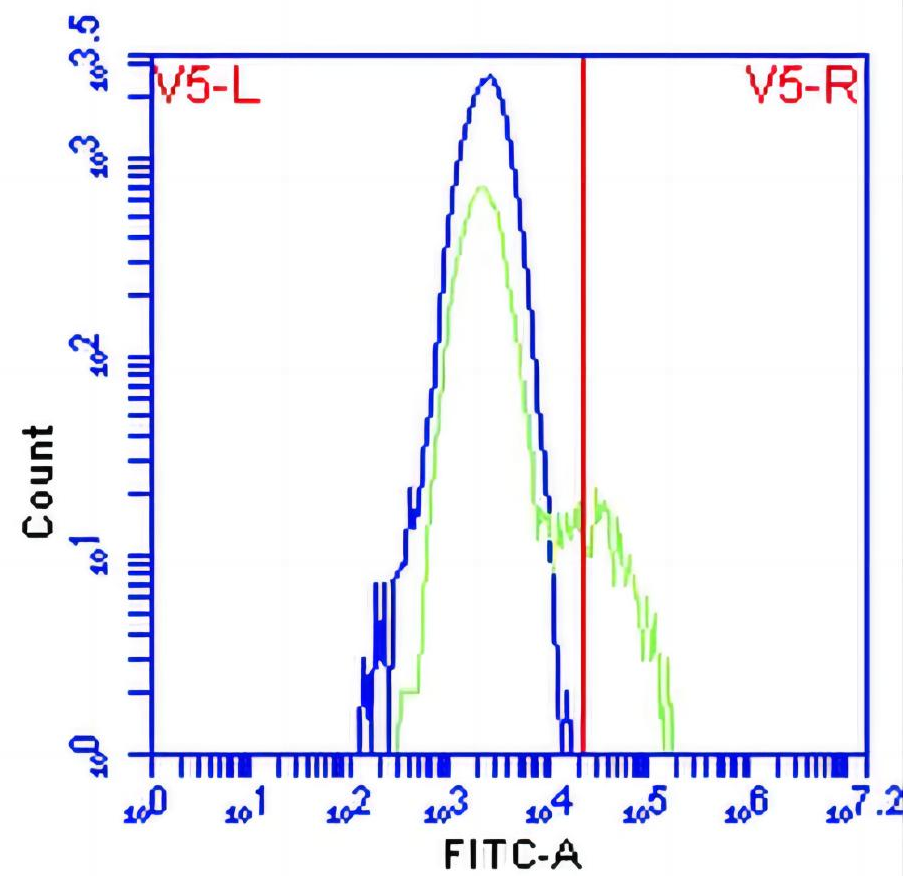

Supplement: Picture_supplement.zip [file Picture_supplement.zip]

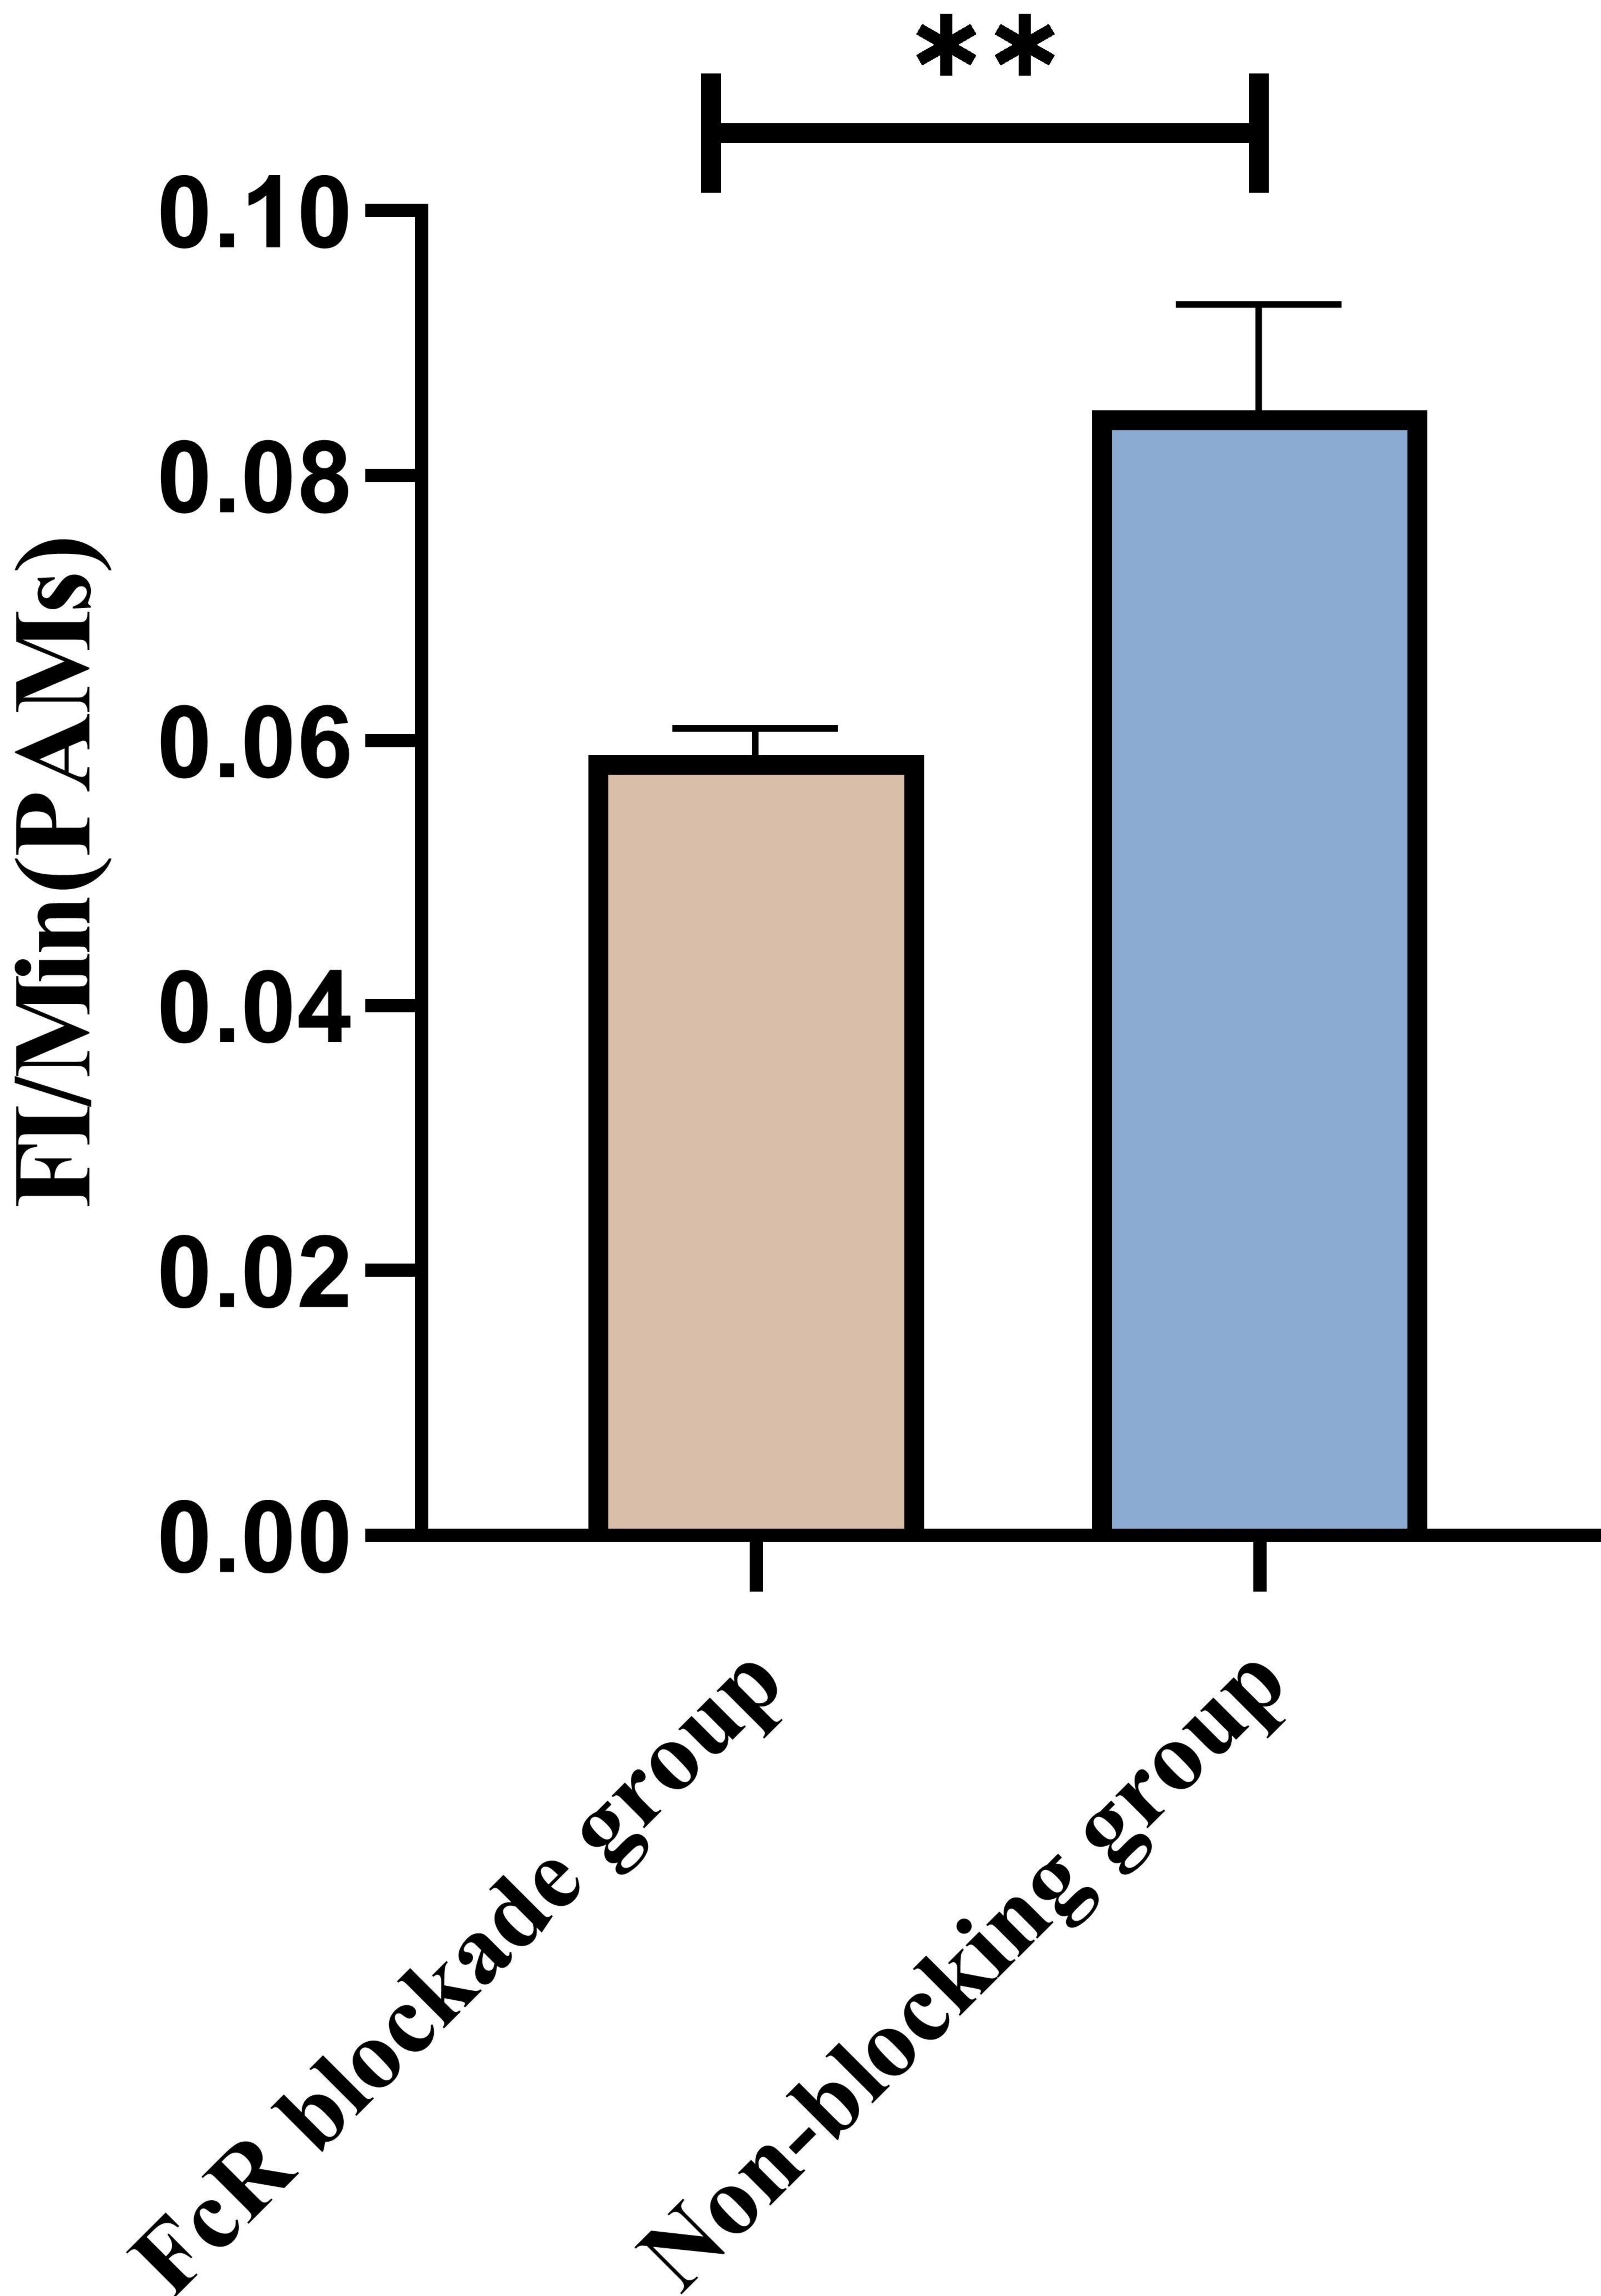

Supplement: Picture_supplement.zip [file Picture_supplement.zip]

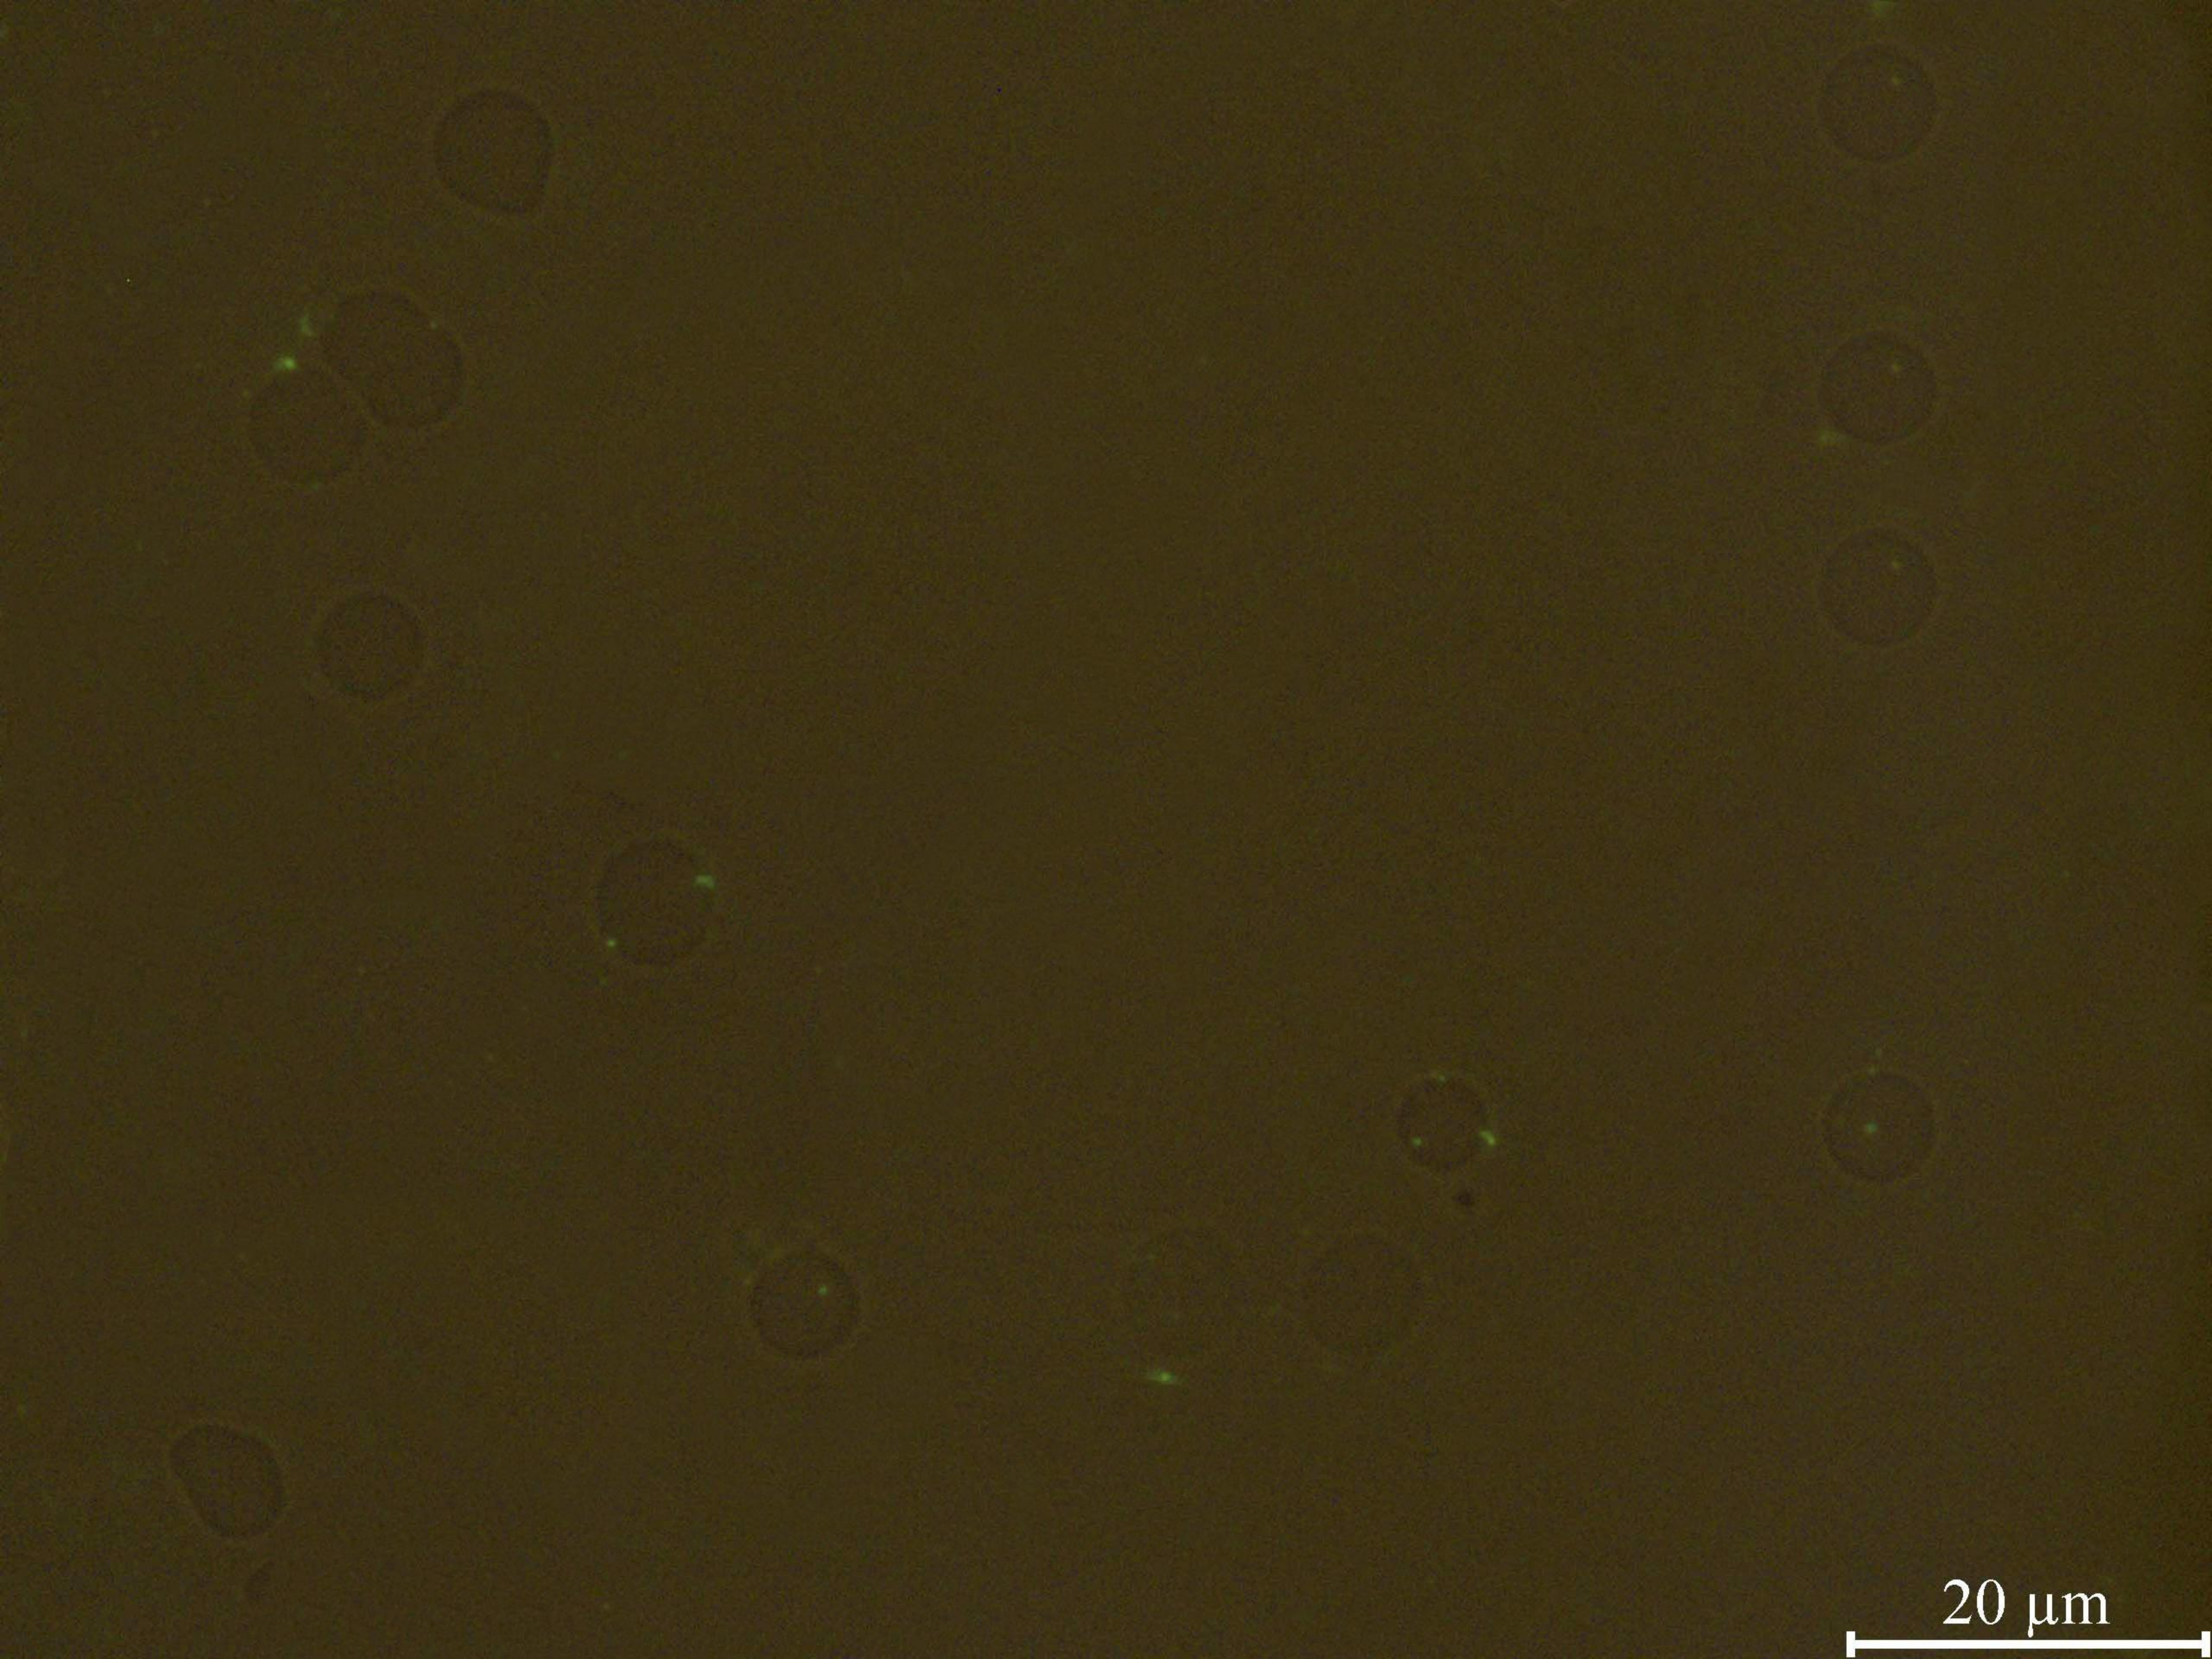

Supplement: Picture_supplement.zip [file Picture_supplement.zip]

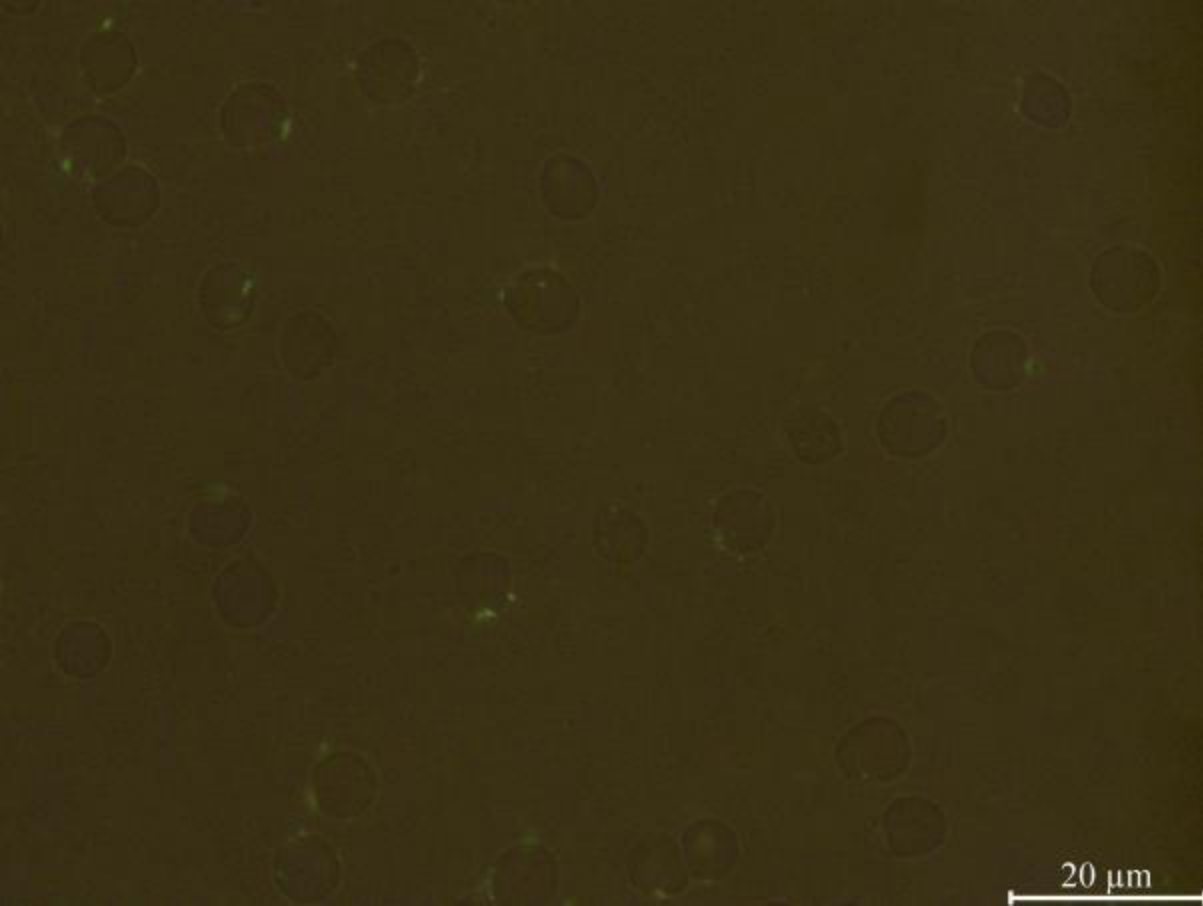

Supplement: Picture_supplement.zip [file Picture_supplement.zip]

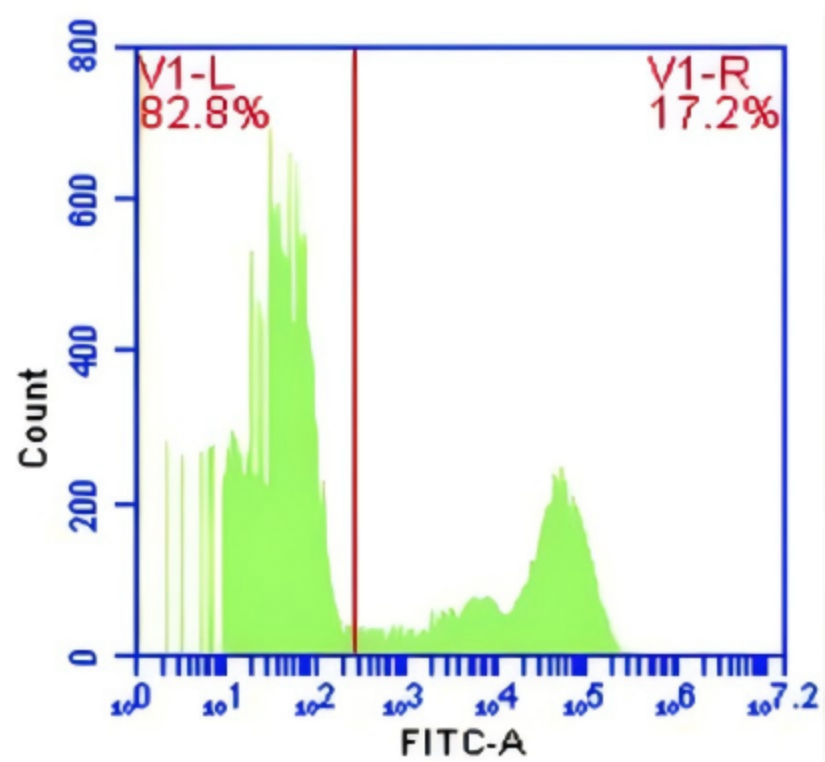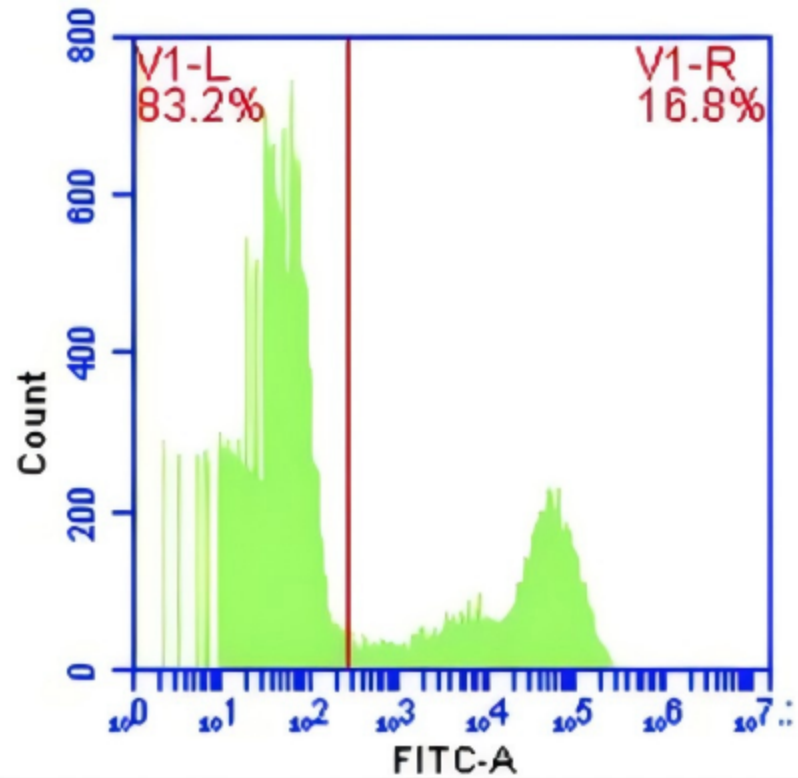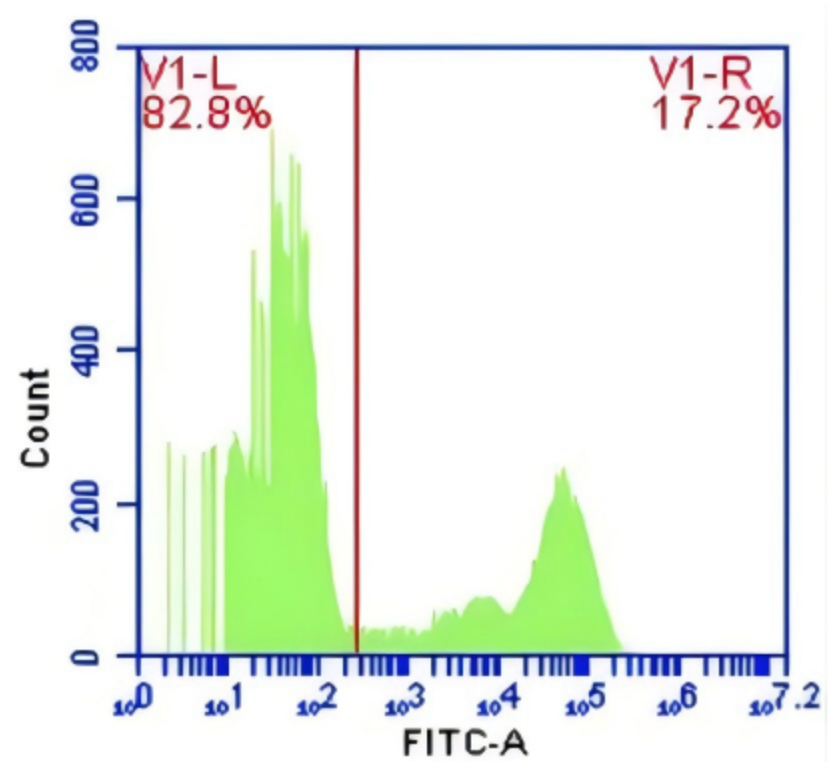

Supplement: Picture_supplement.zip [file Picture_supplement.zip]

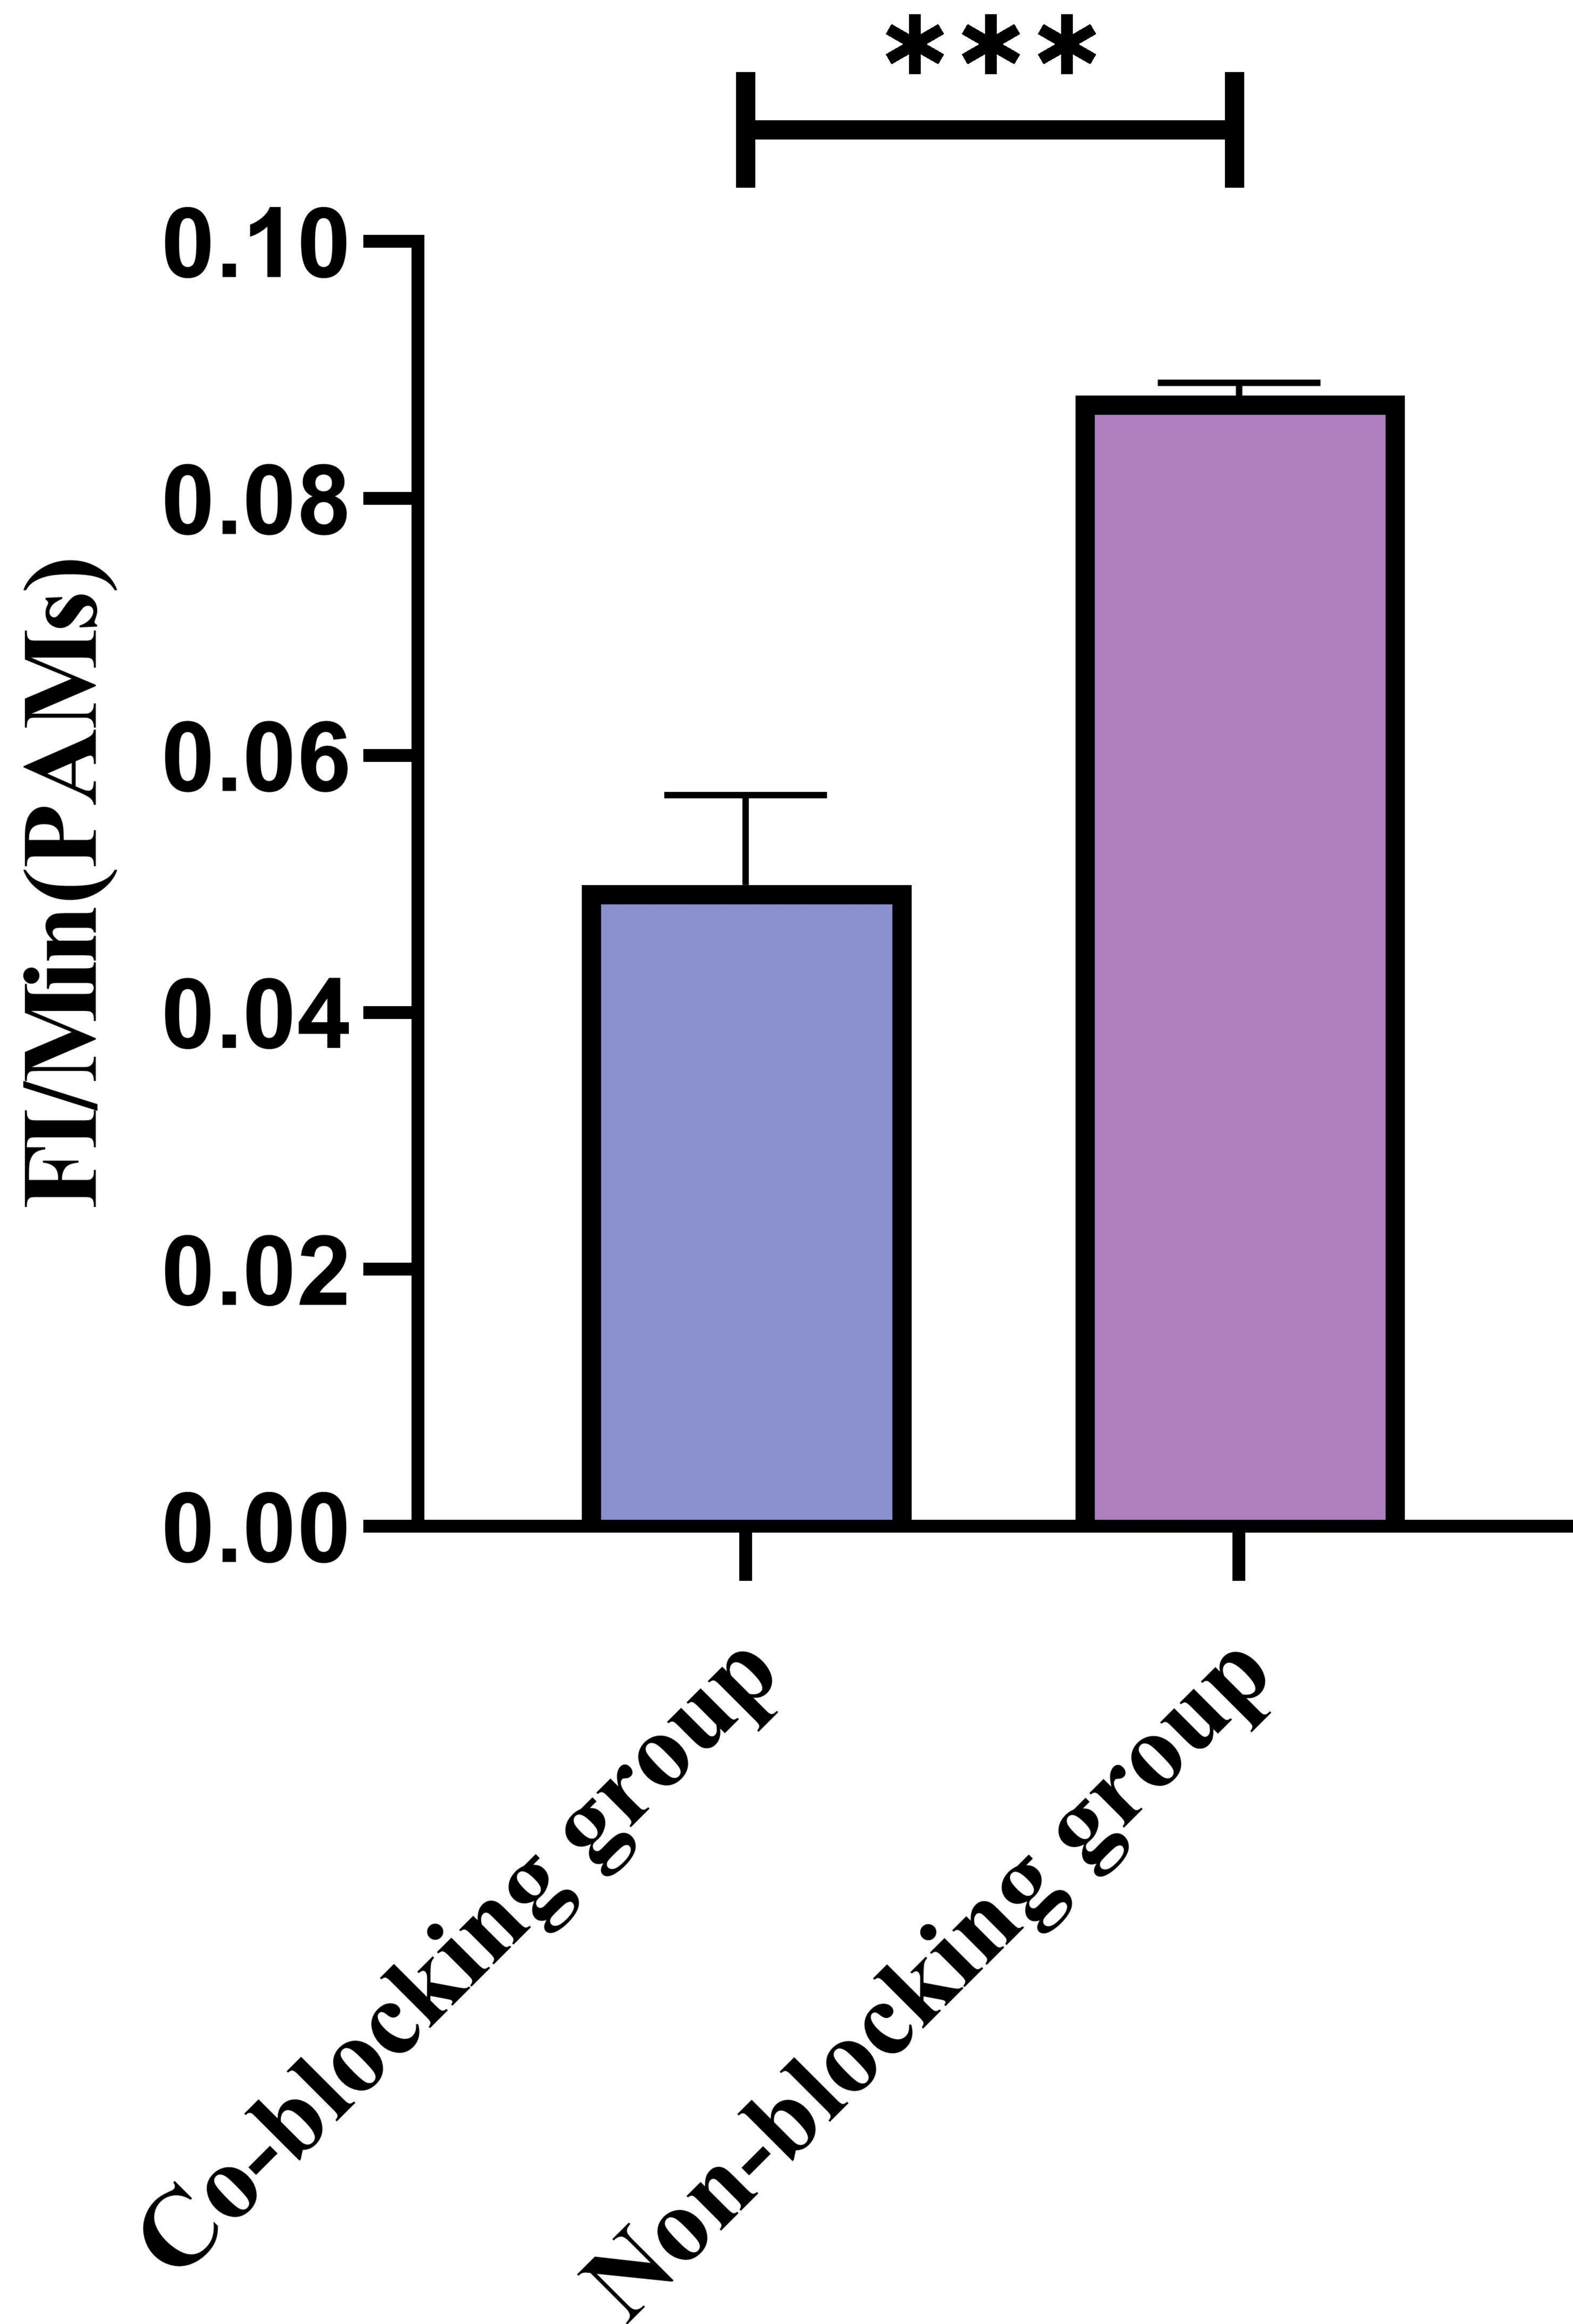

Supplement: Picture_supplement.zip [file Picture_supplement.zip]

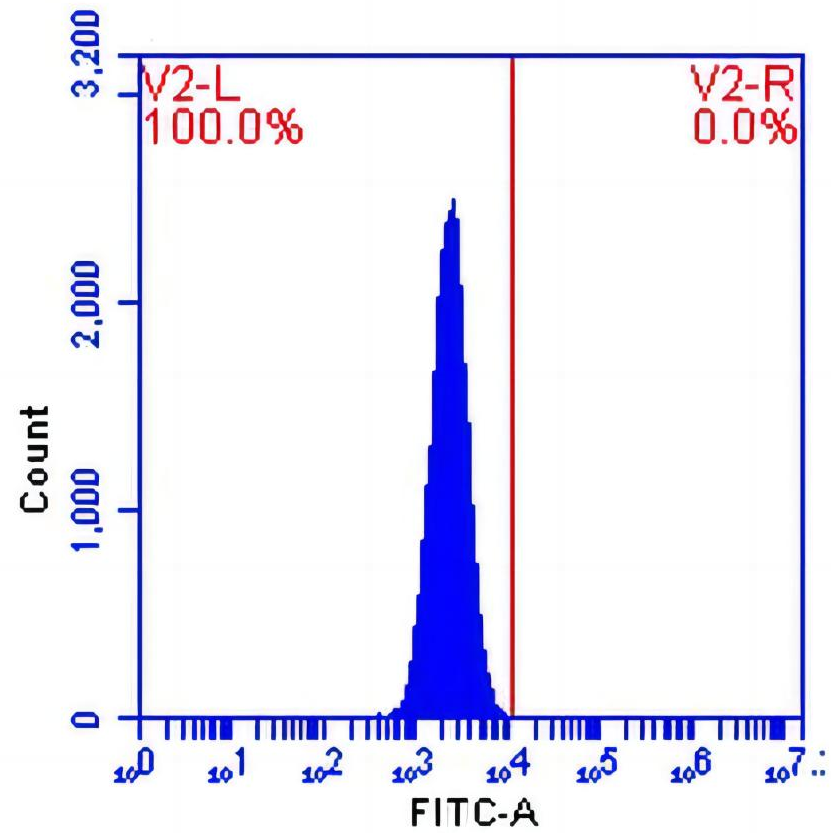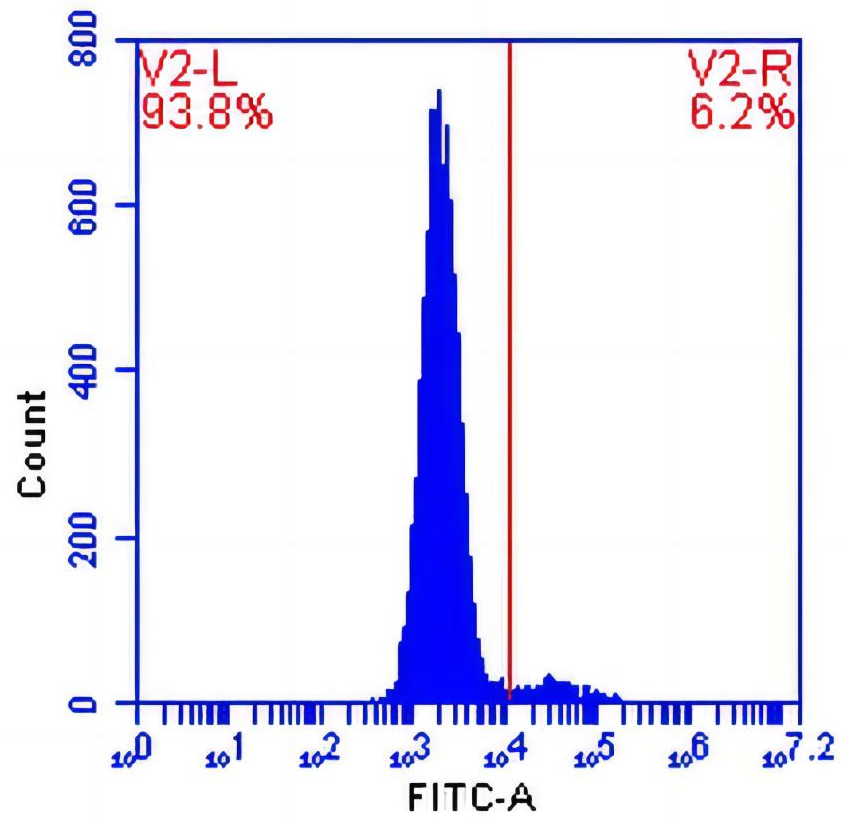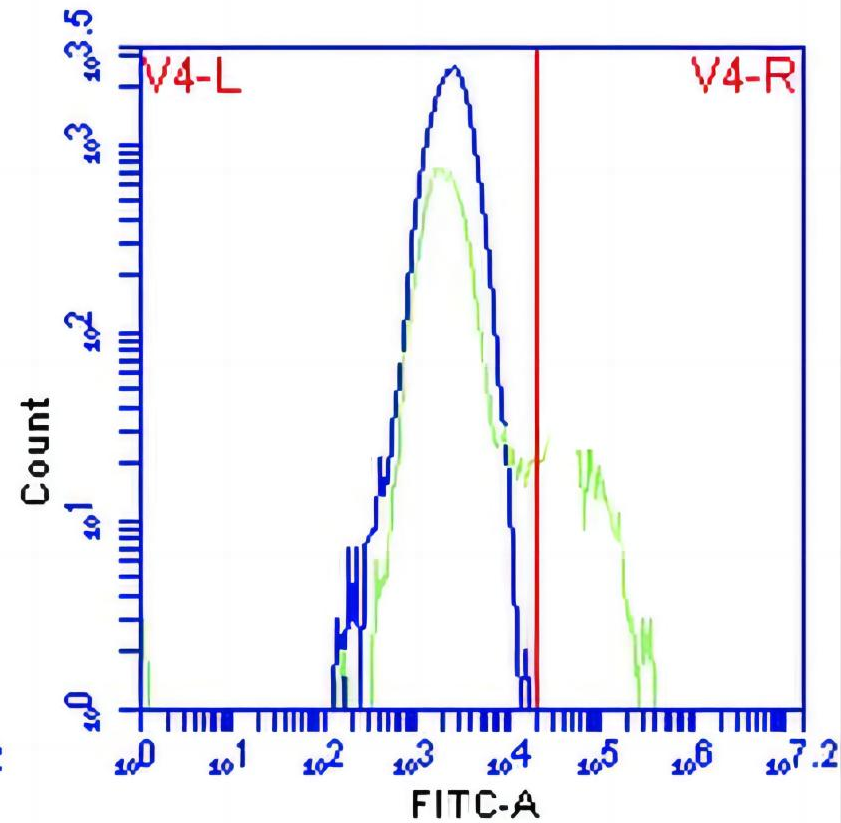

Supplement: Picture_supplement.zip [file Picture_supplement.zip]

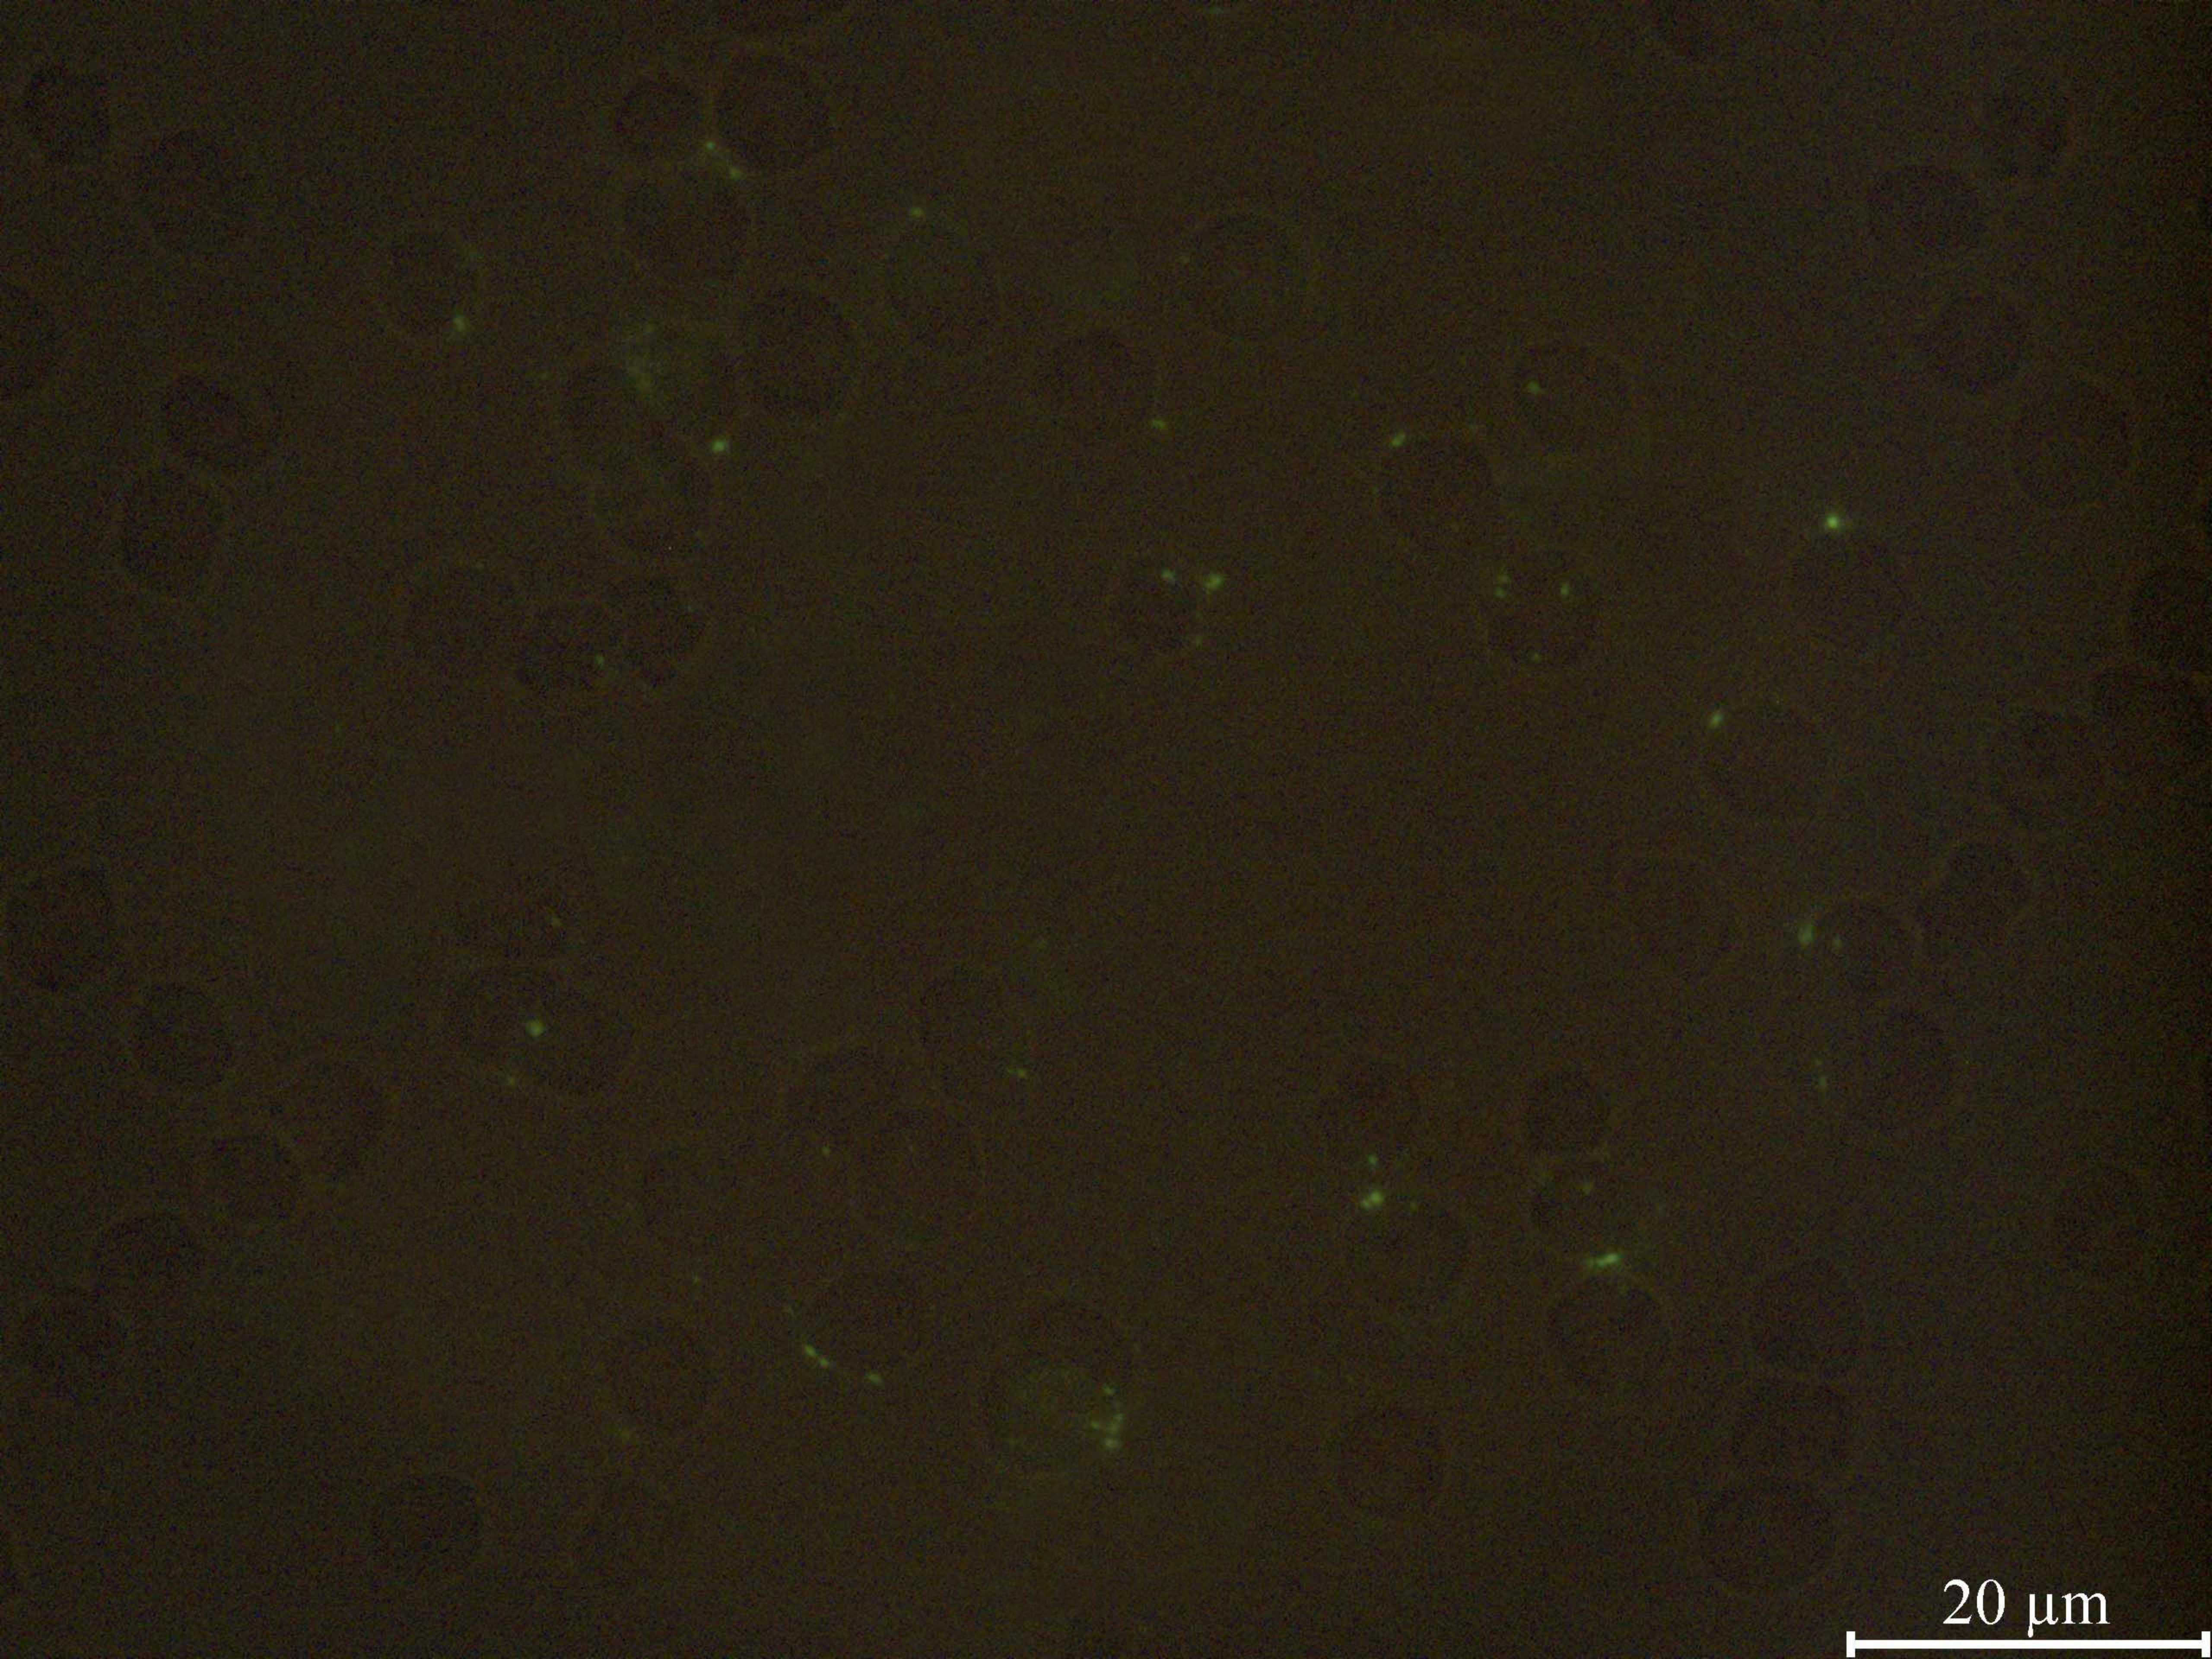

Supplement: Picture_supplement.zip [file Picture_supplement.zip]

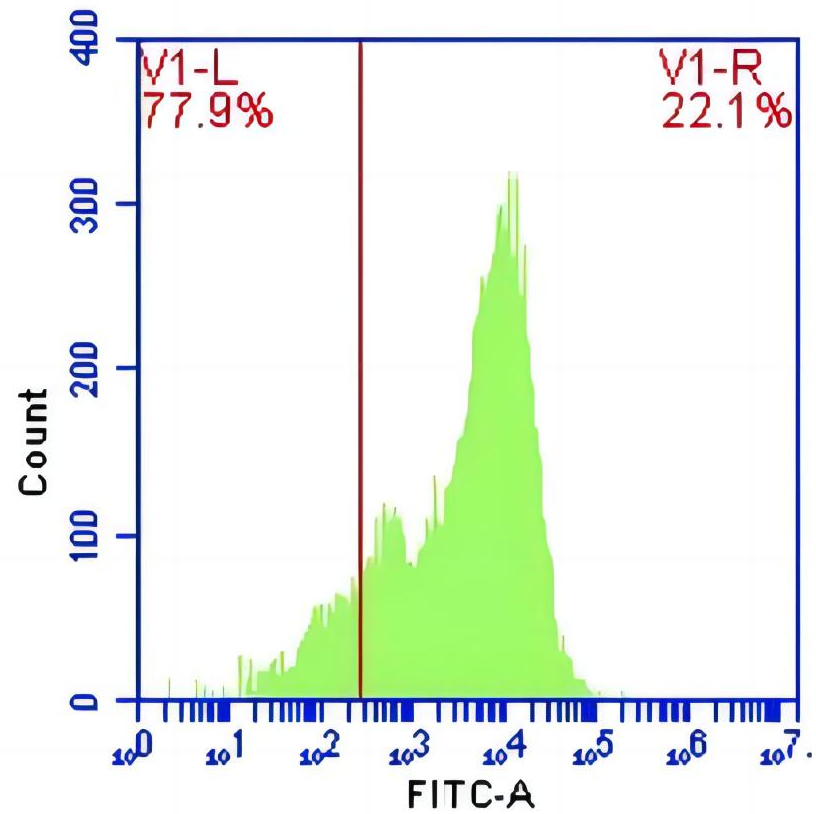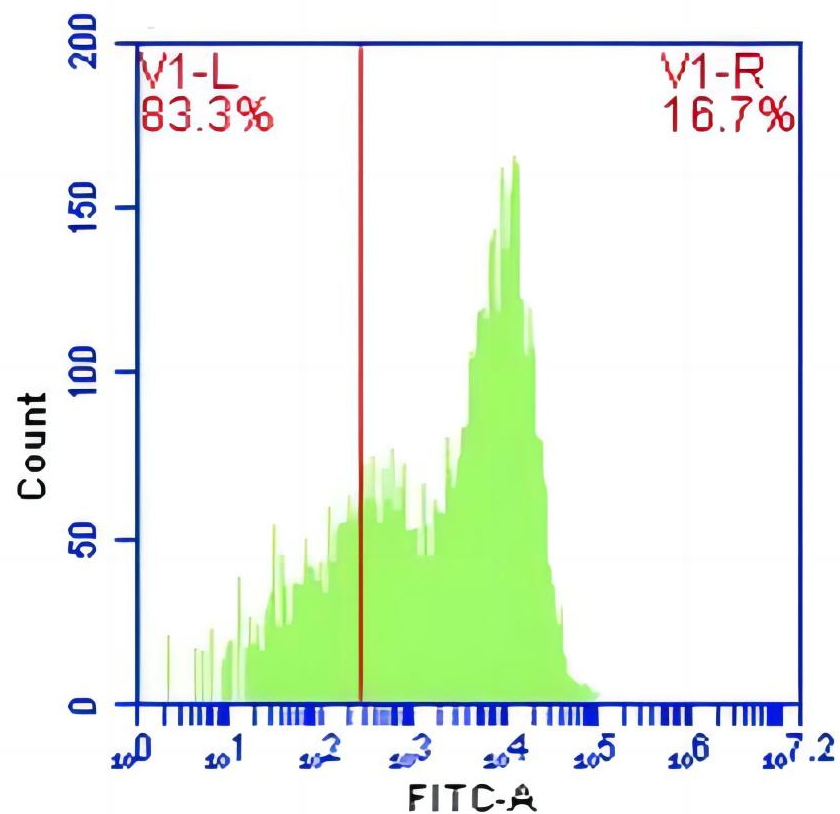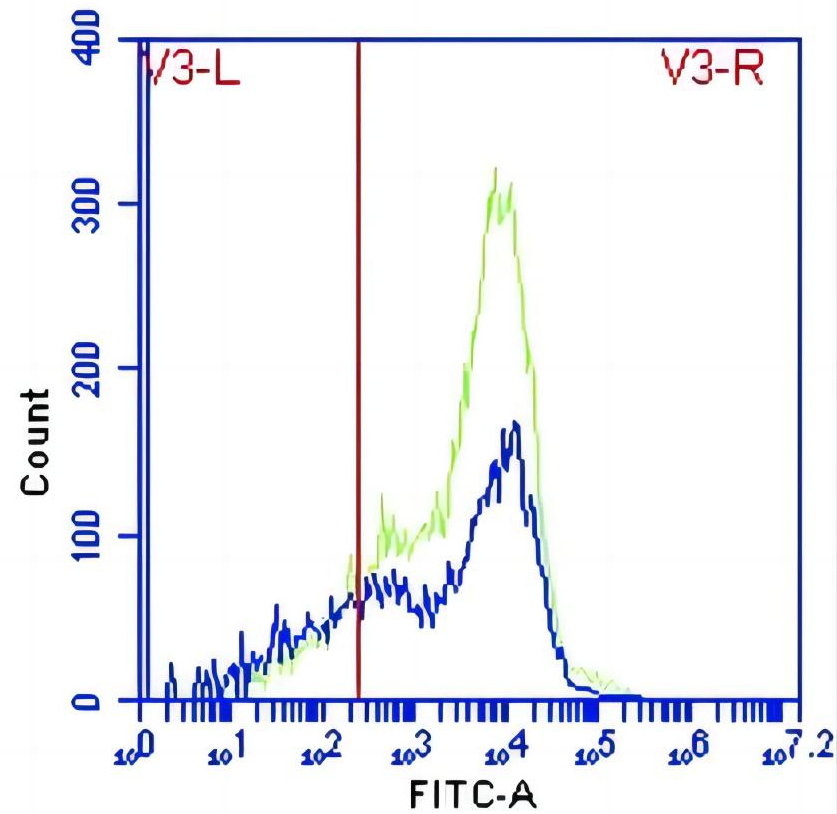

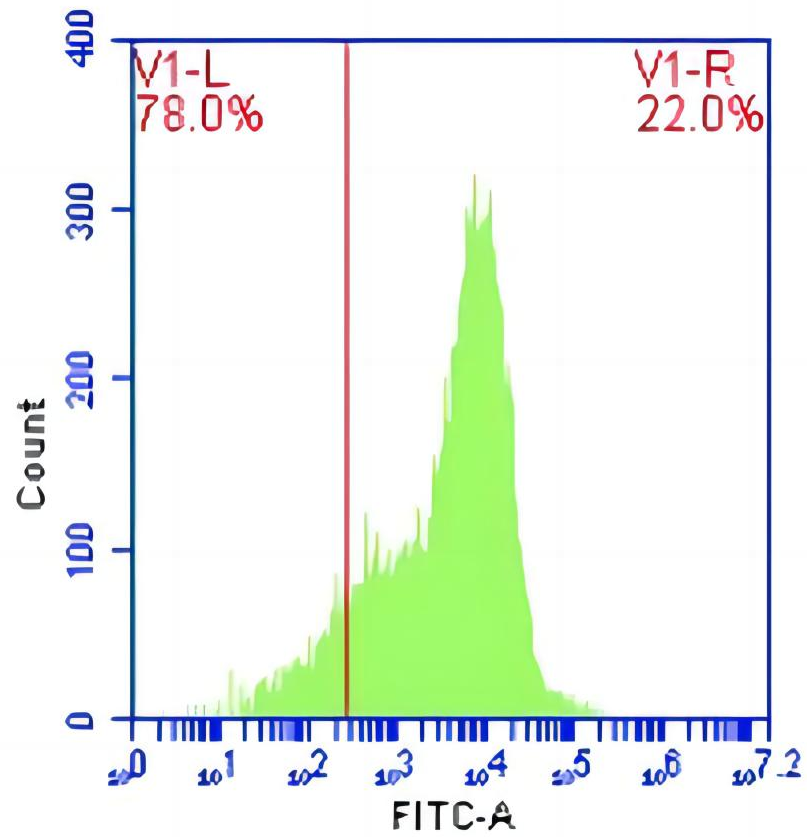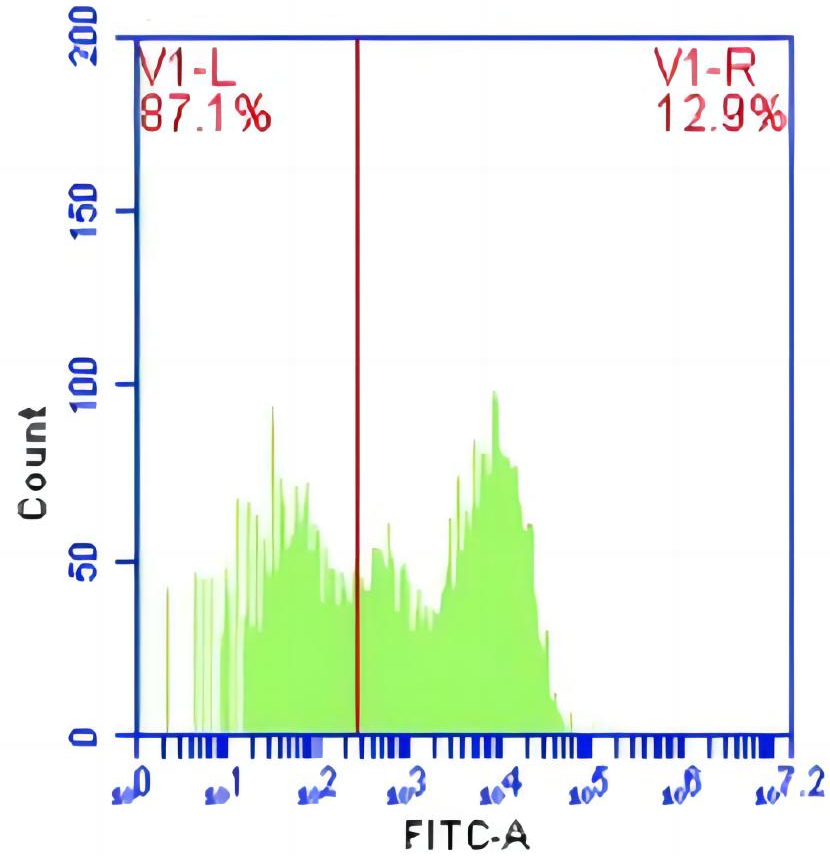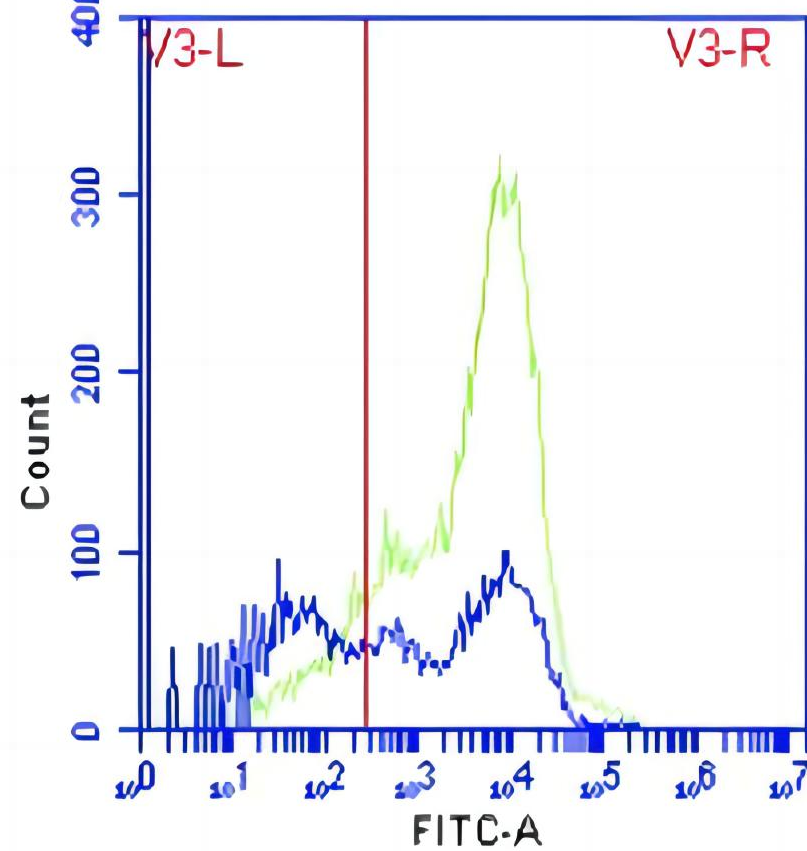

Supplement: Picture_supplement.zip [file Picture_supplement.zip]

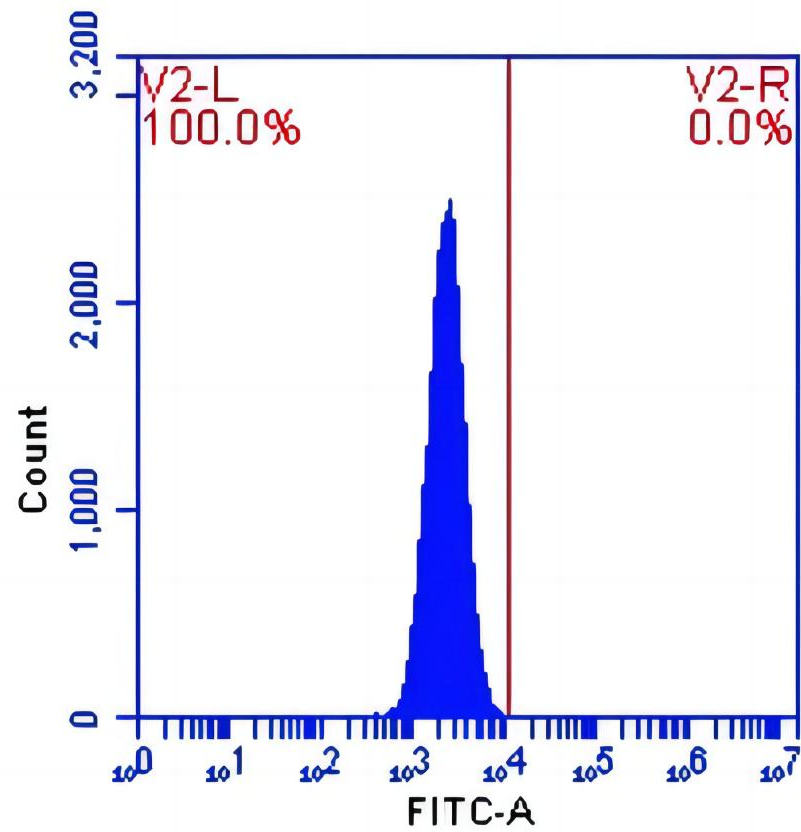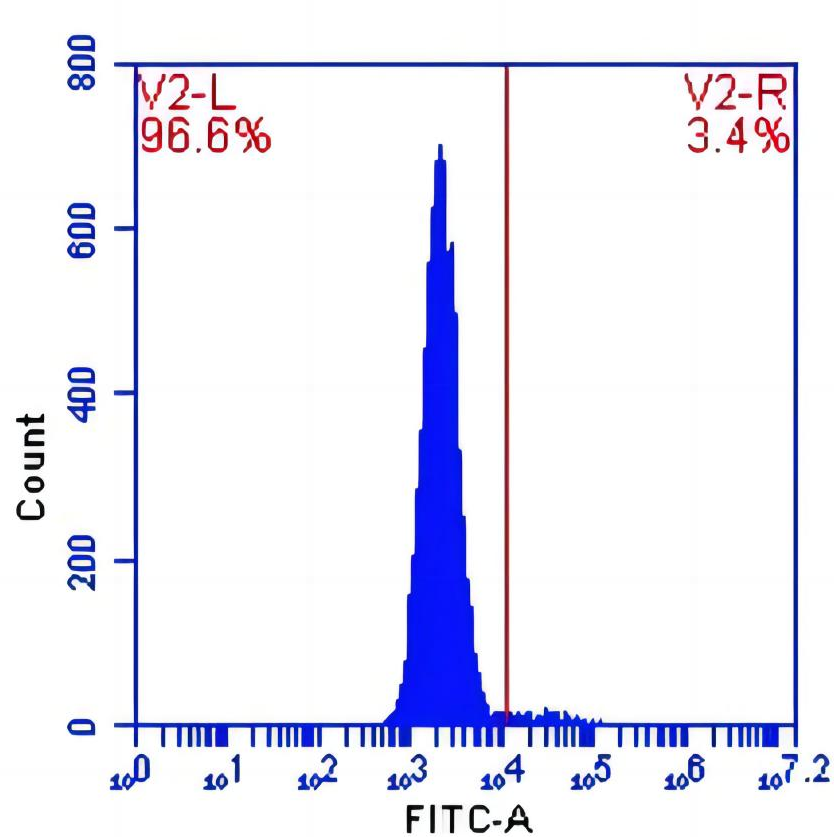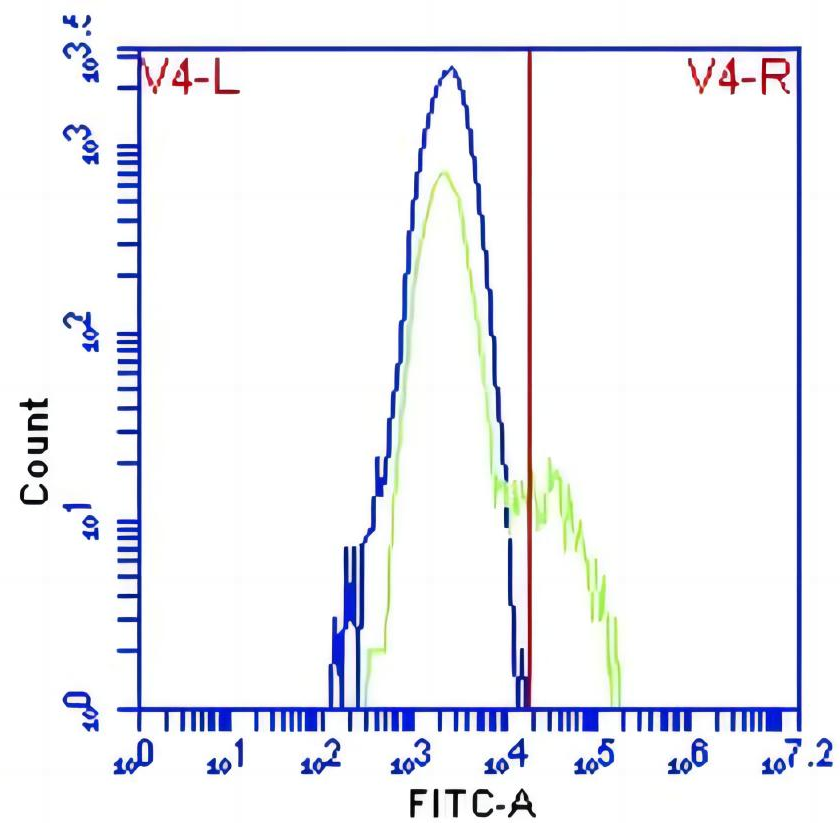

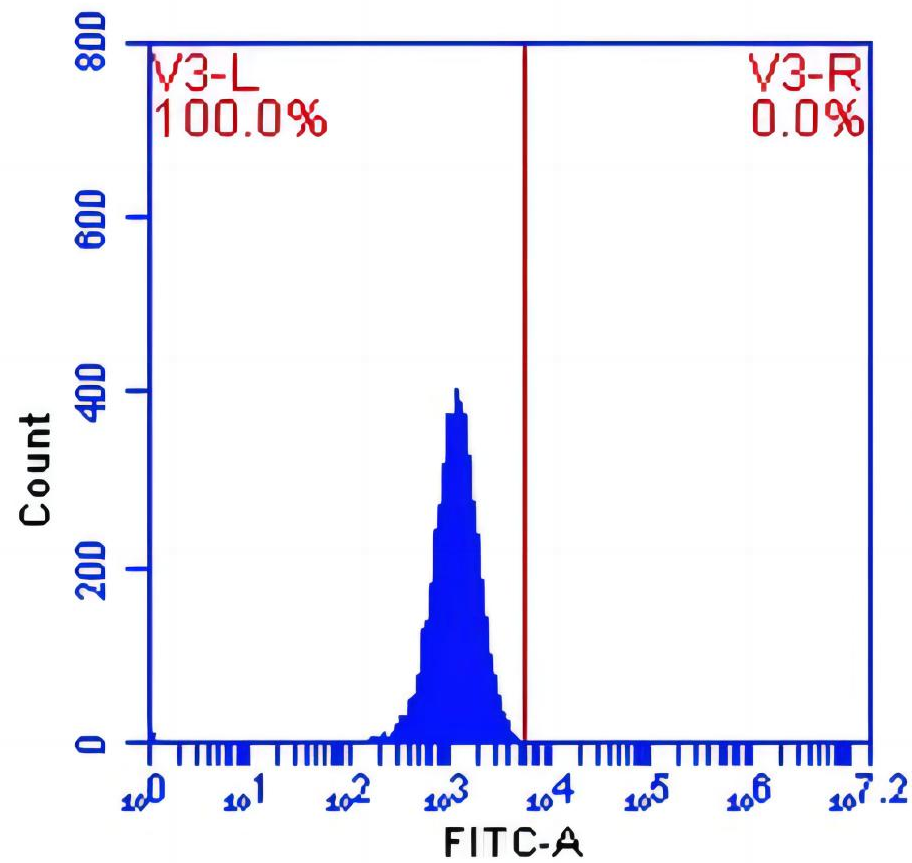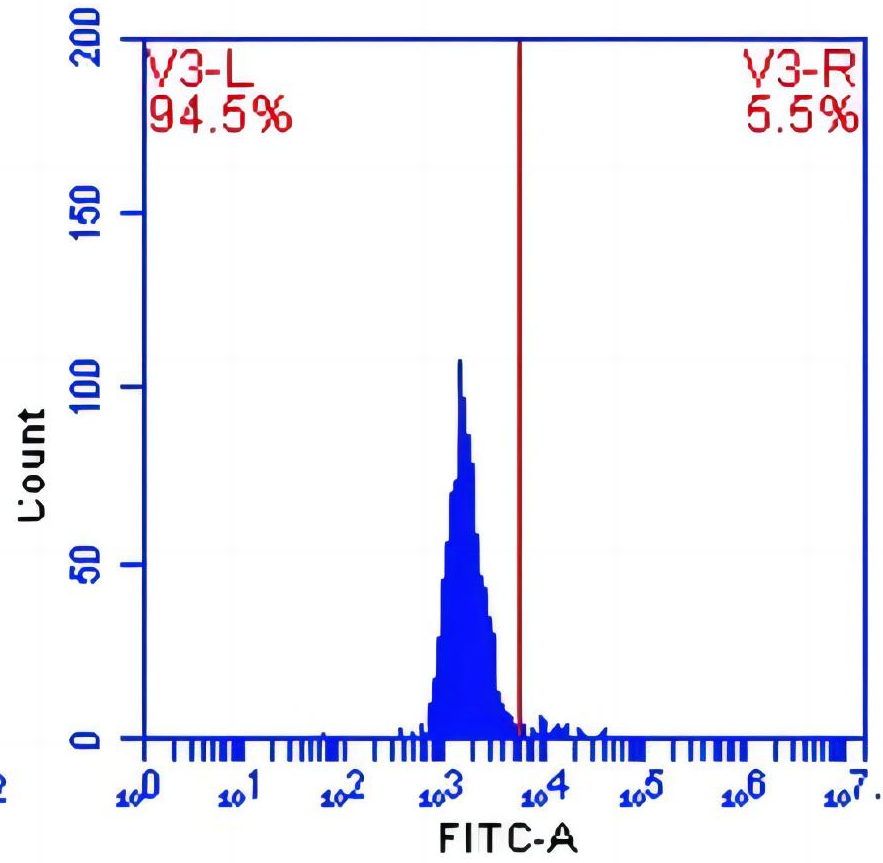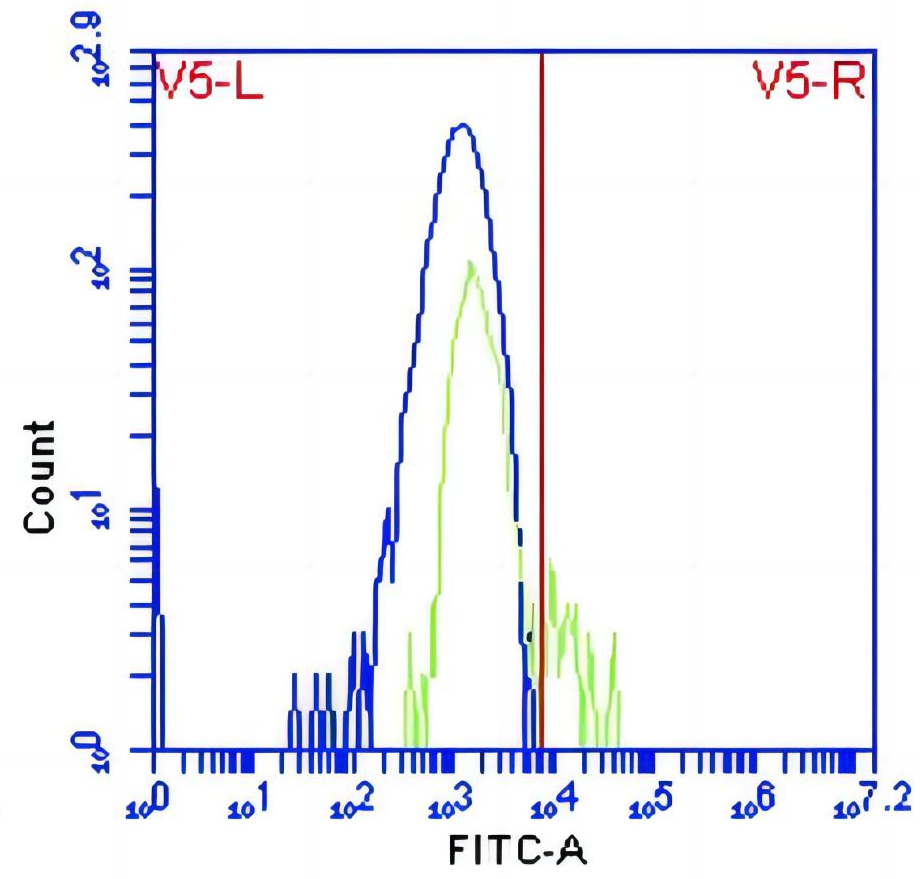

Supplement: Picture_supplement.zip [file Picture_supplement.zip]

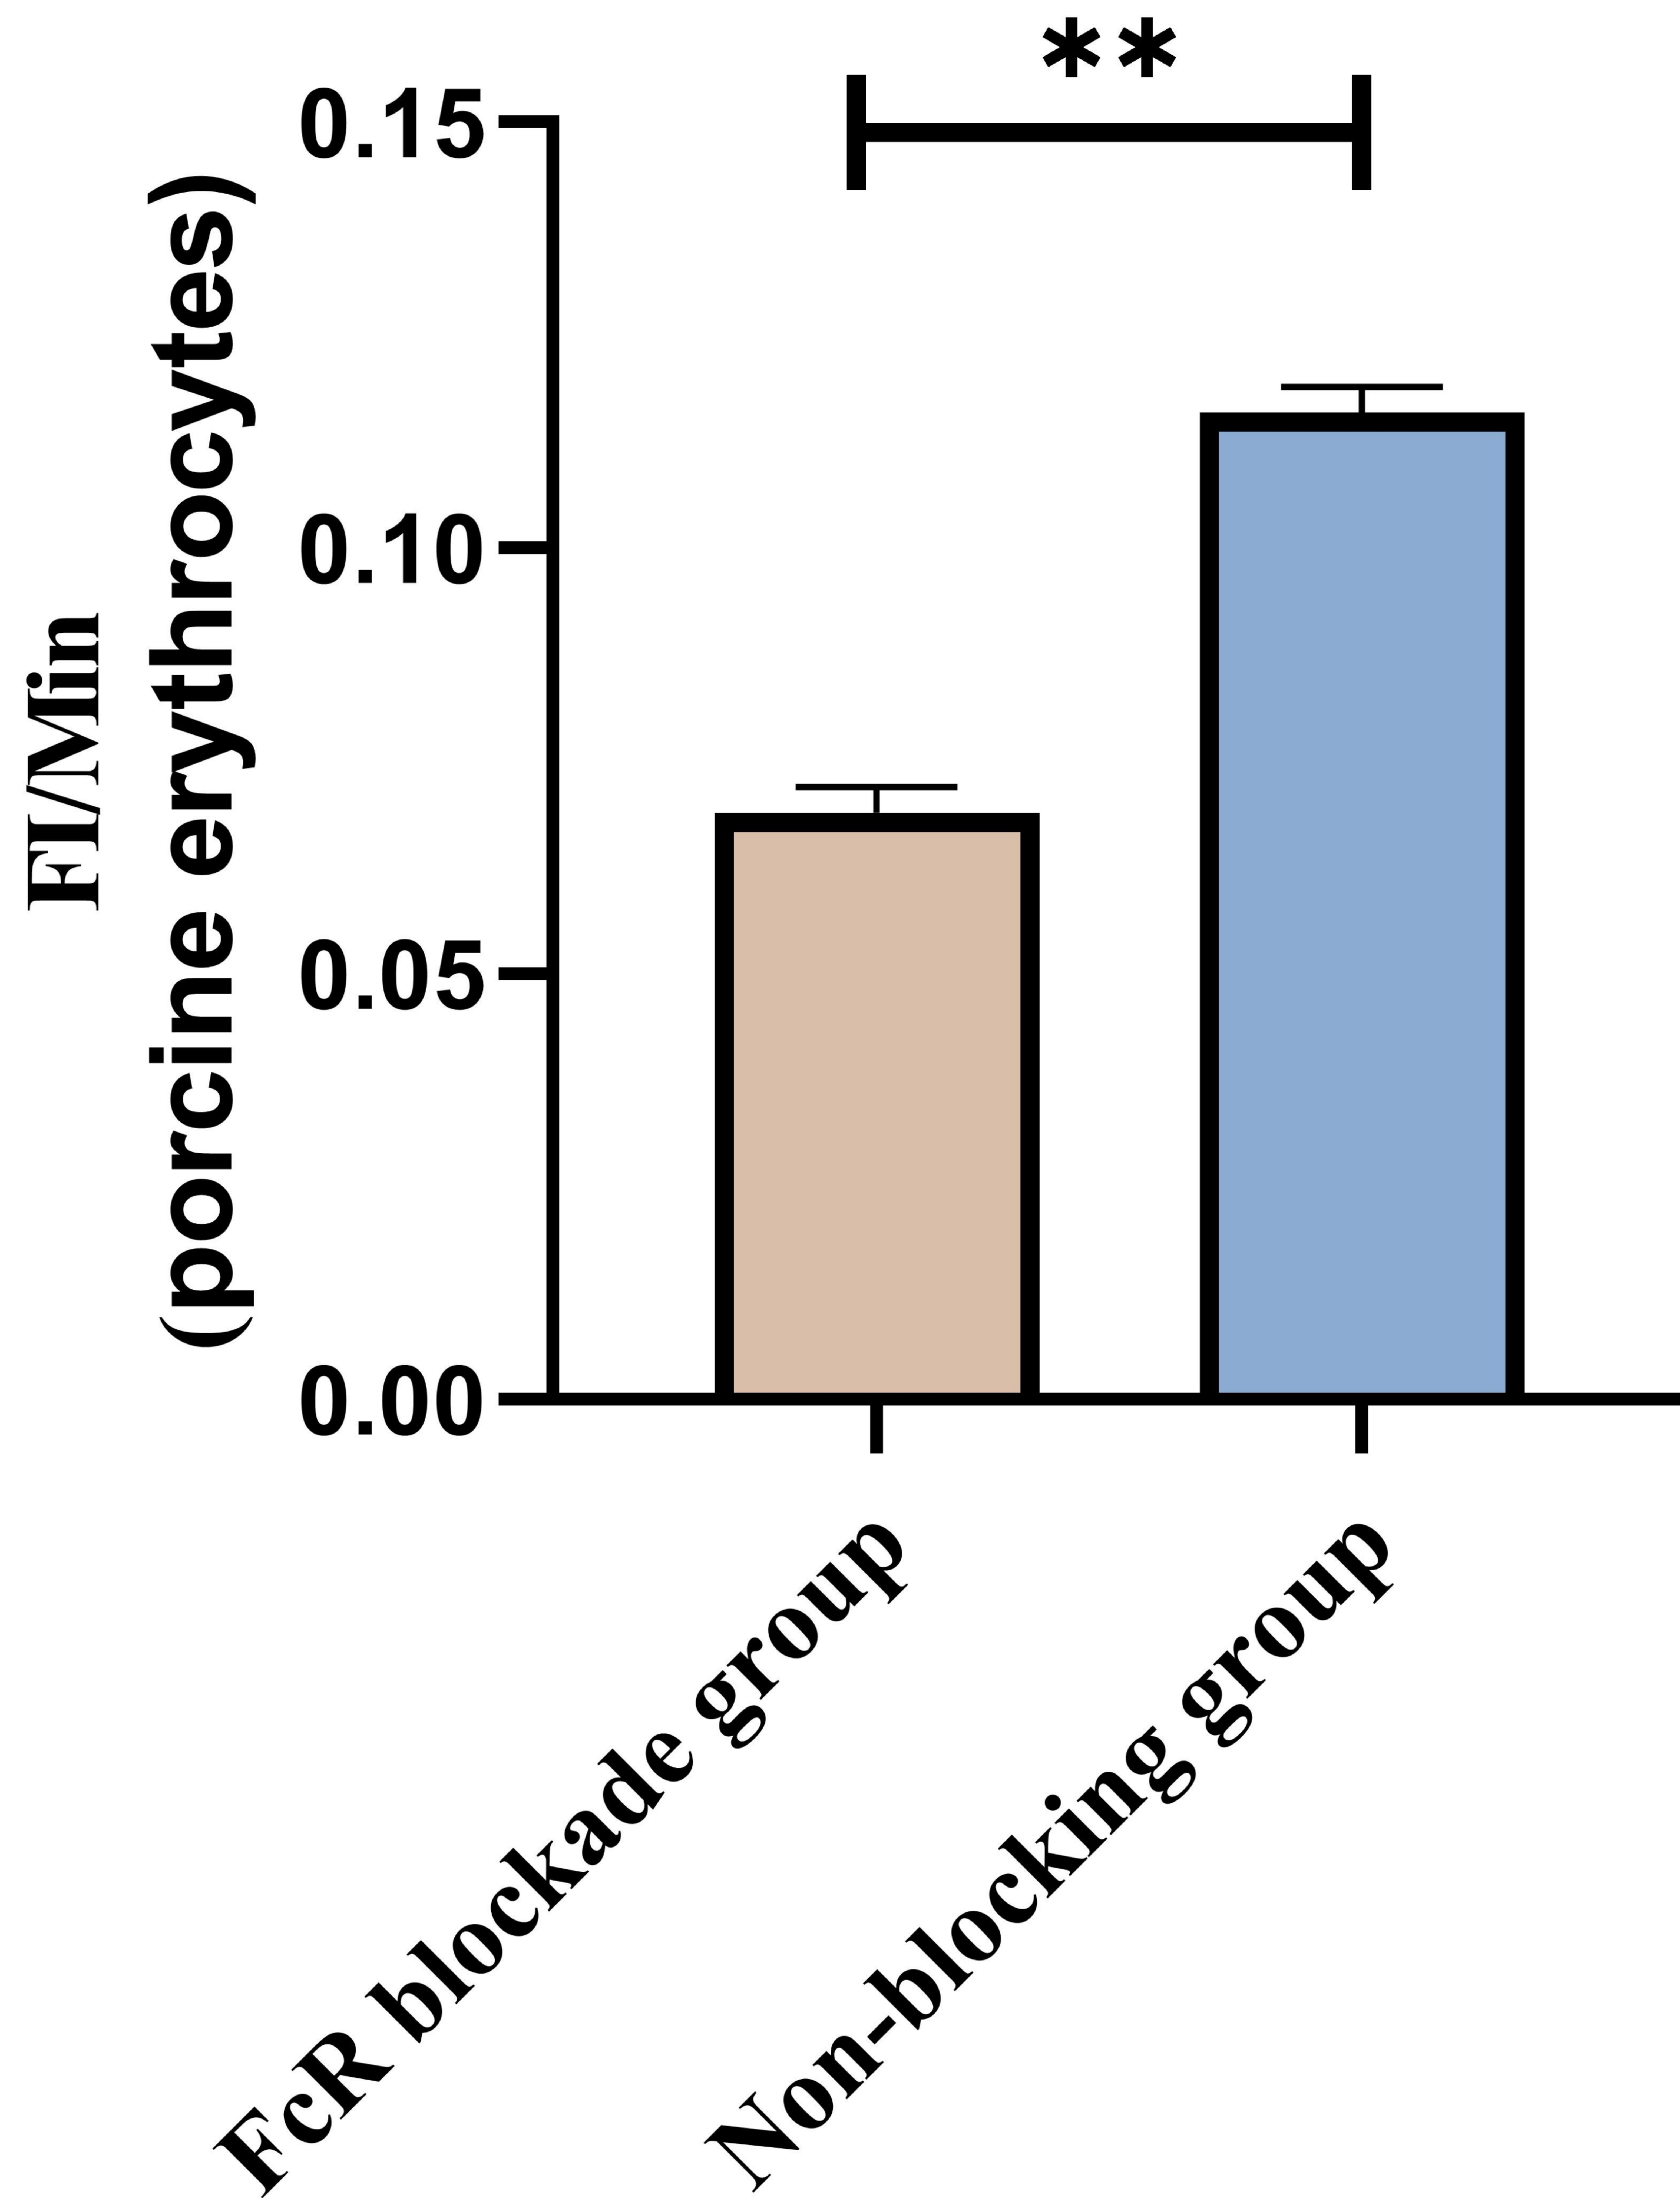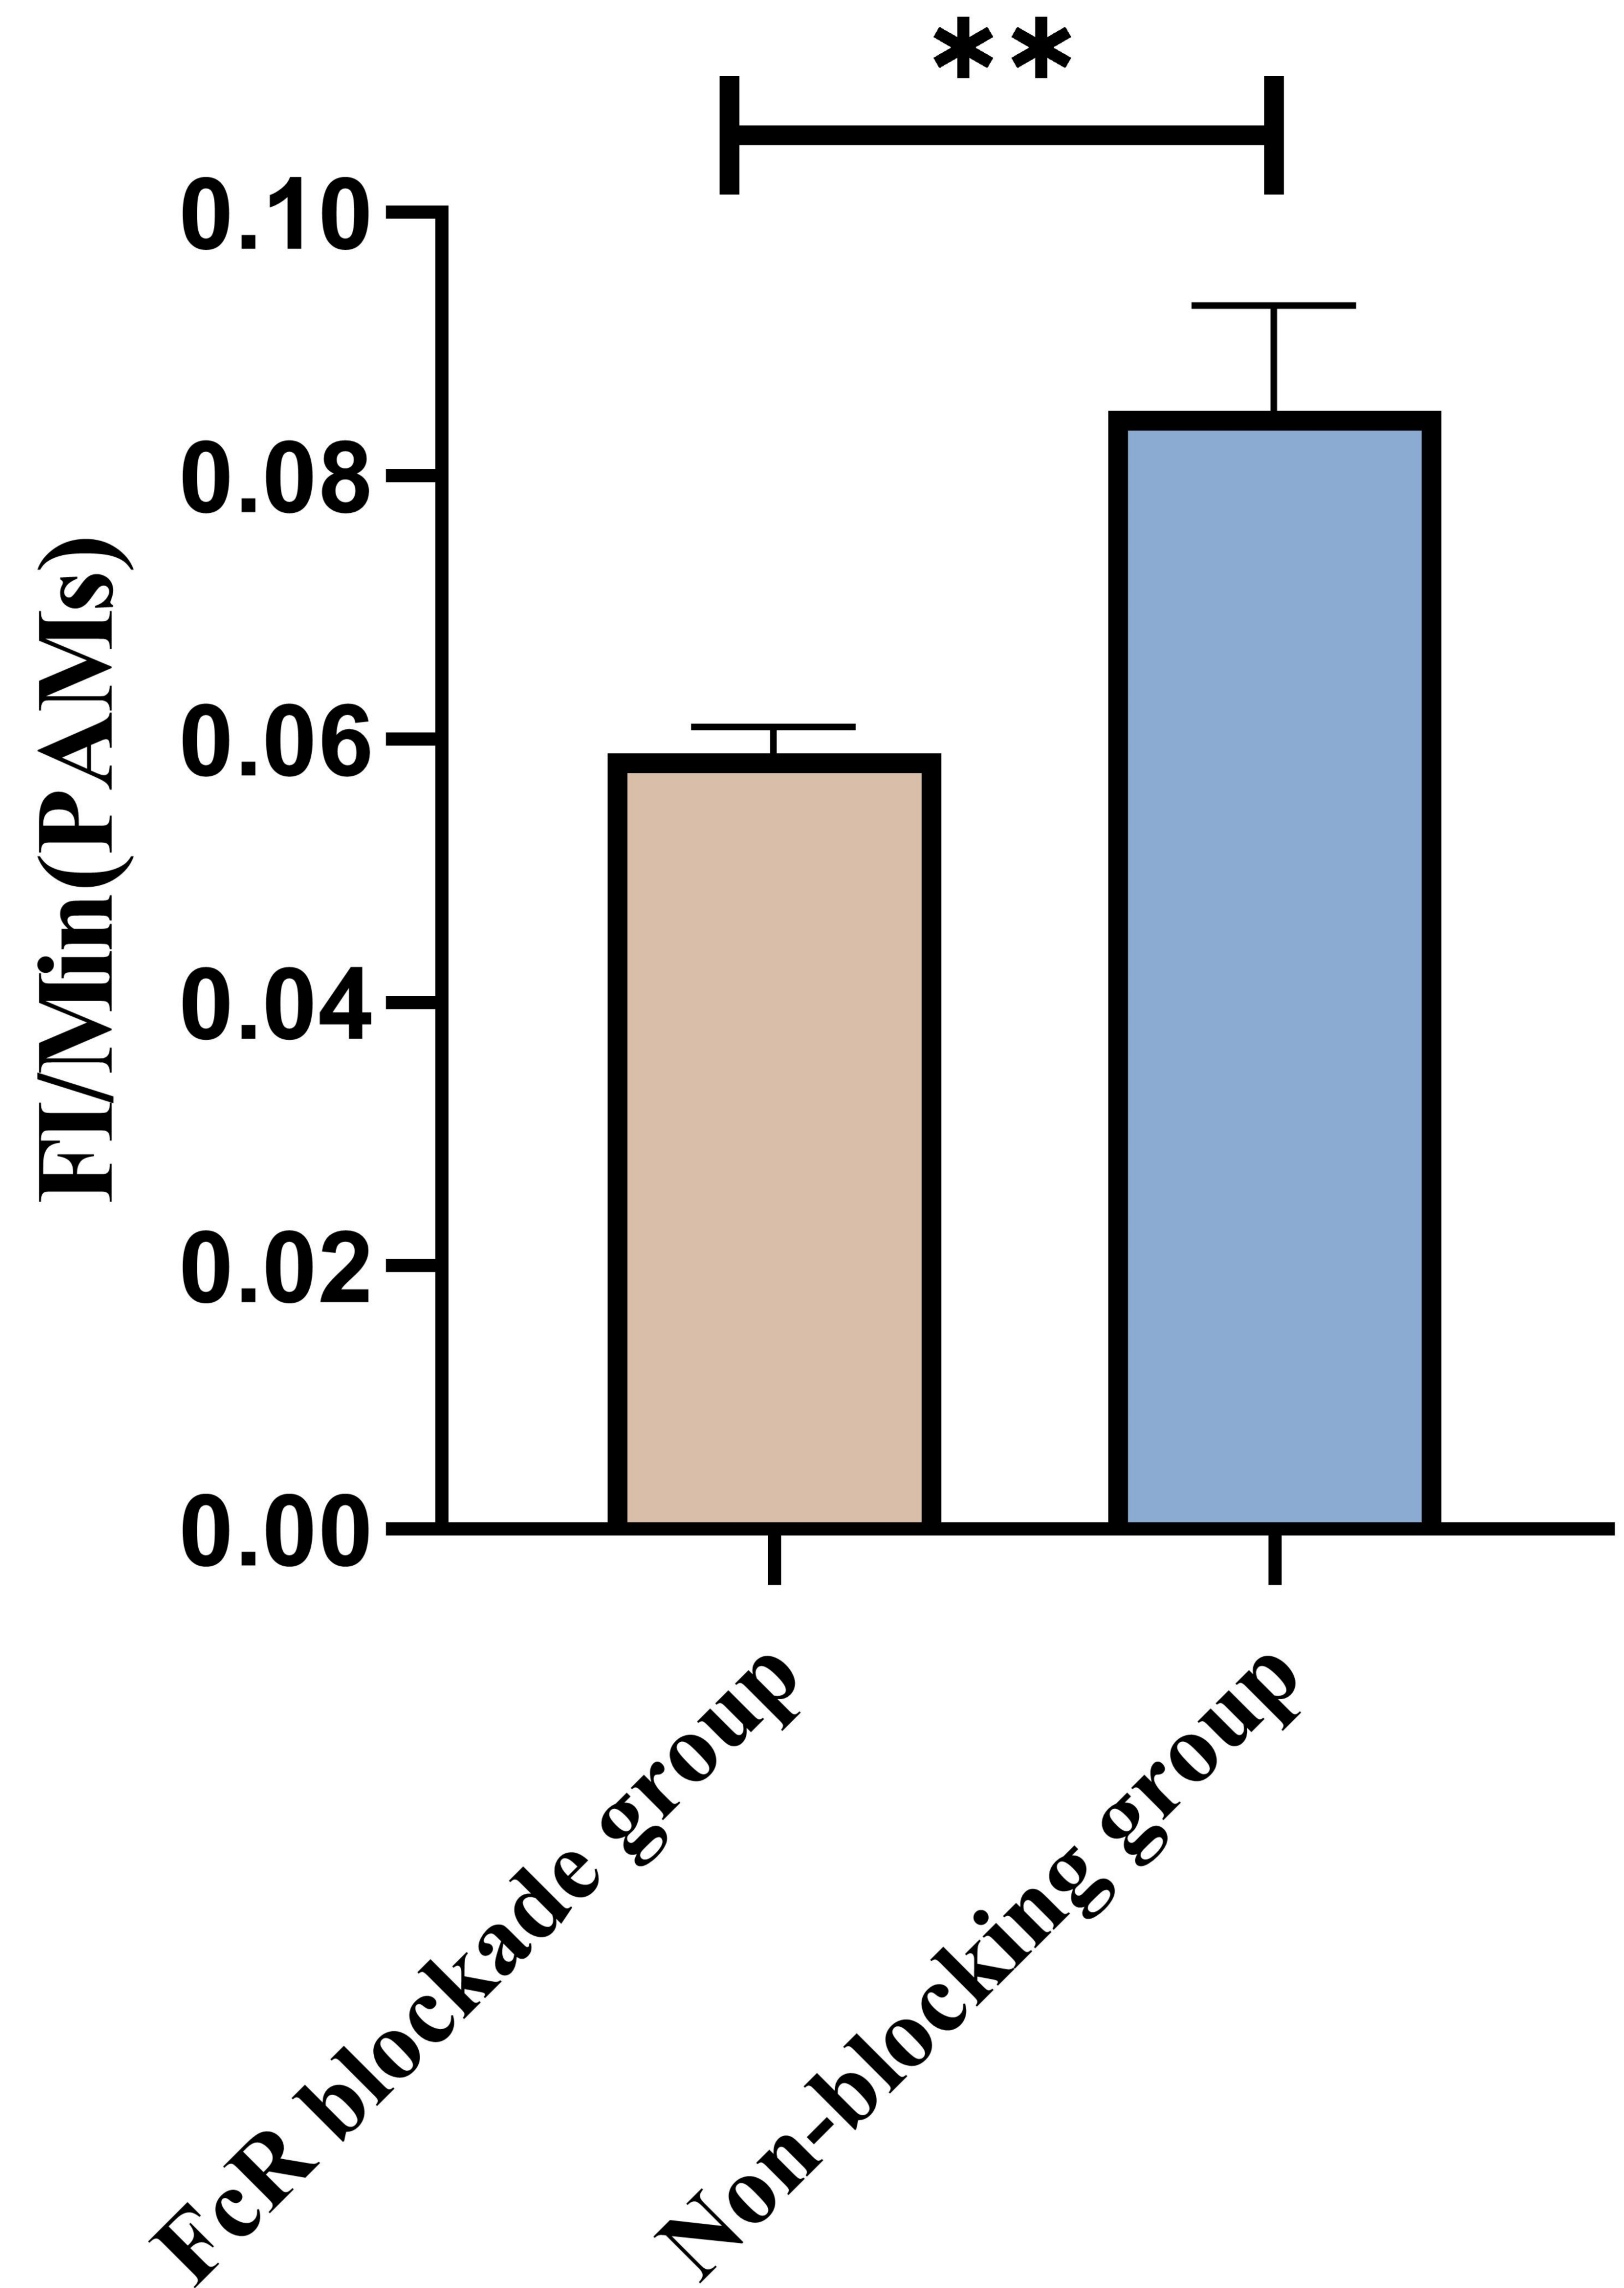

Supplement: Picture_supplement.zip [file Picture_supplement.zip]

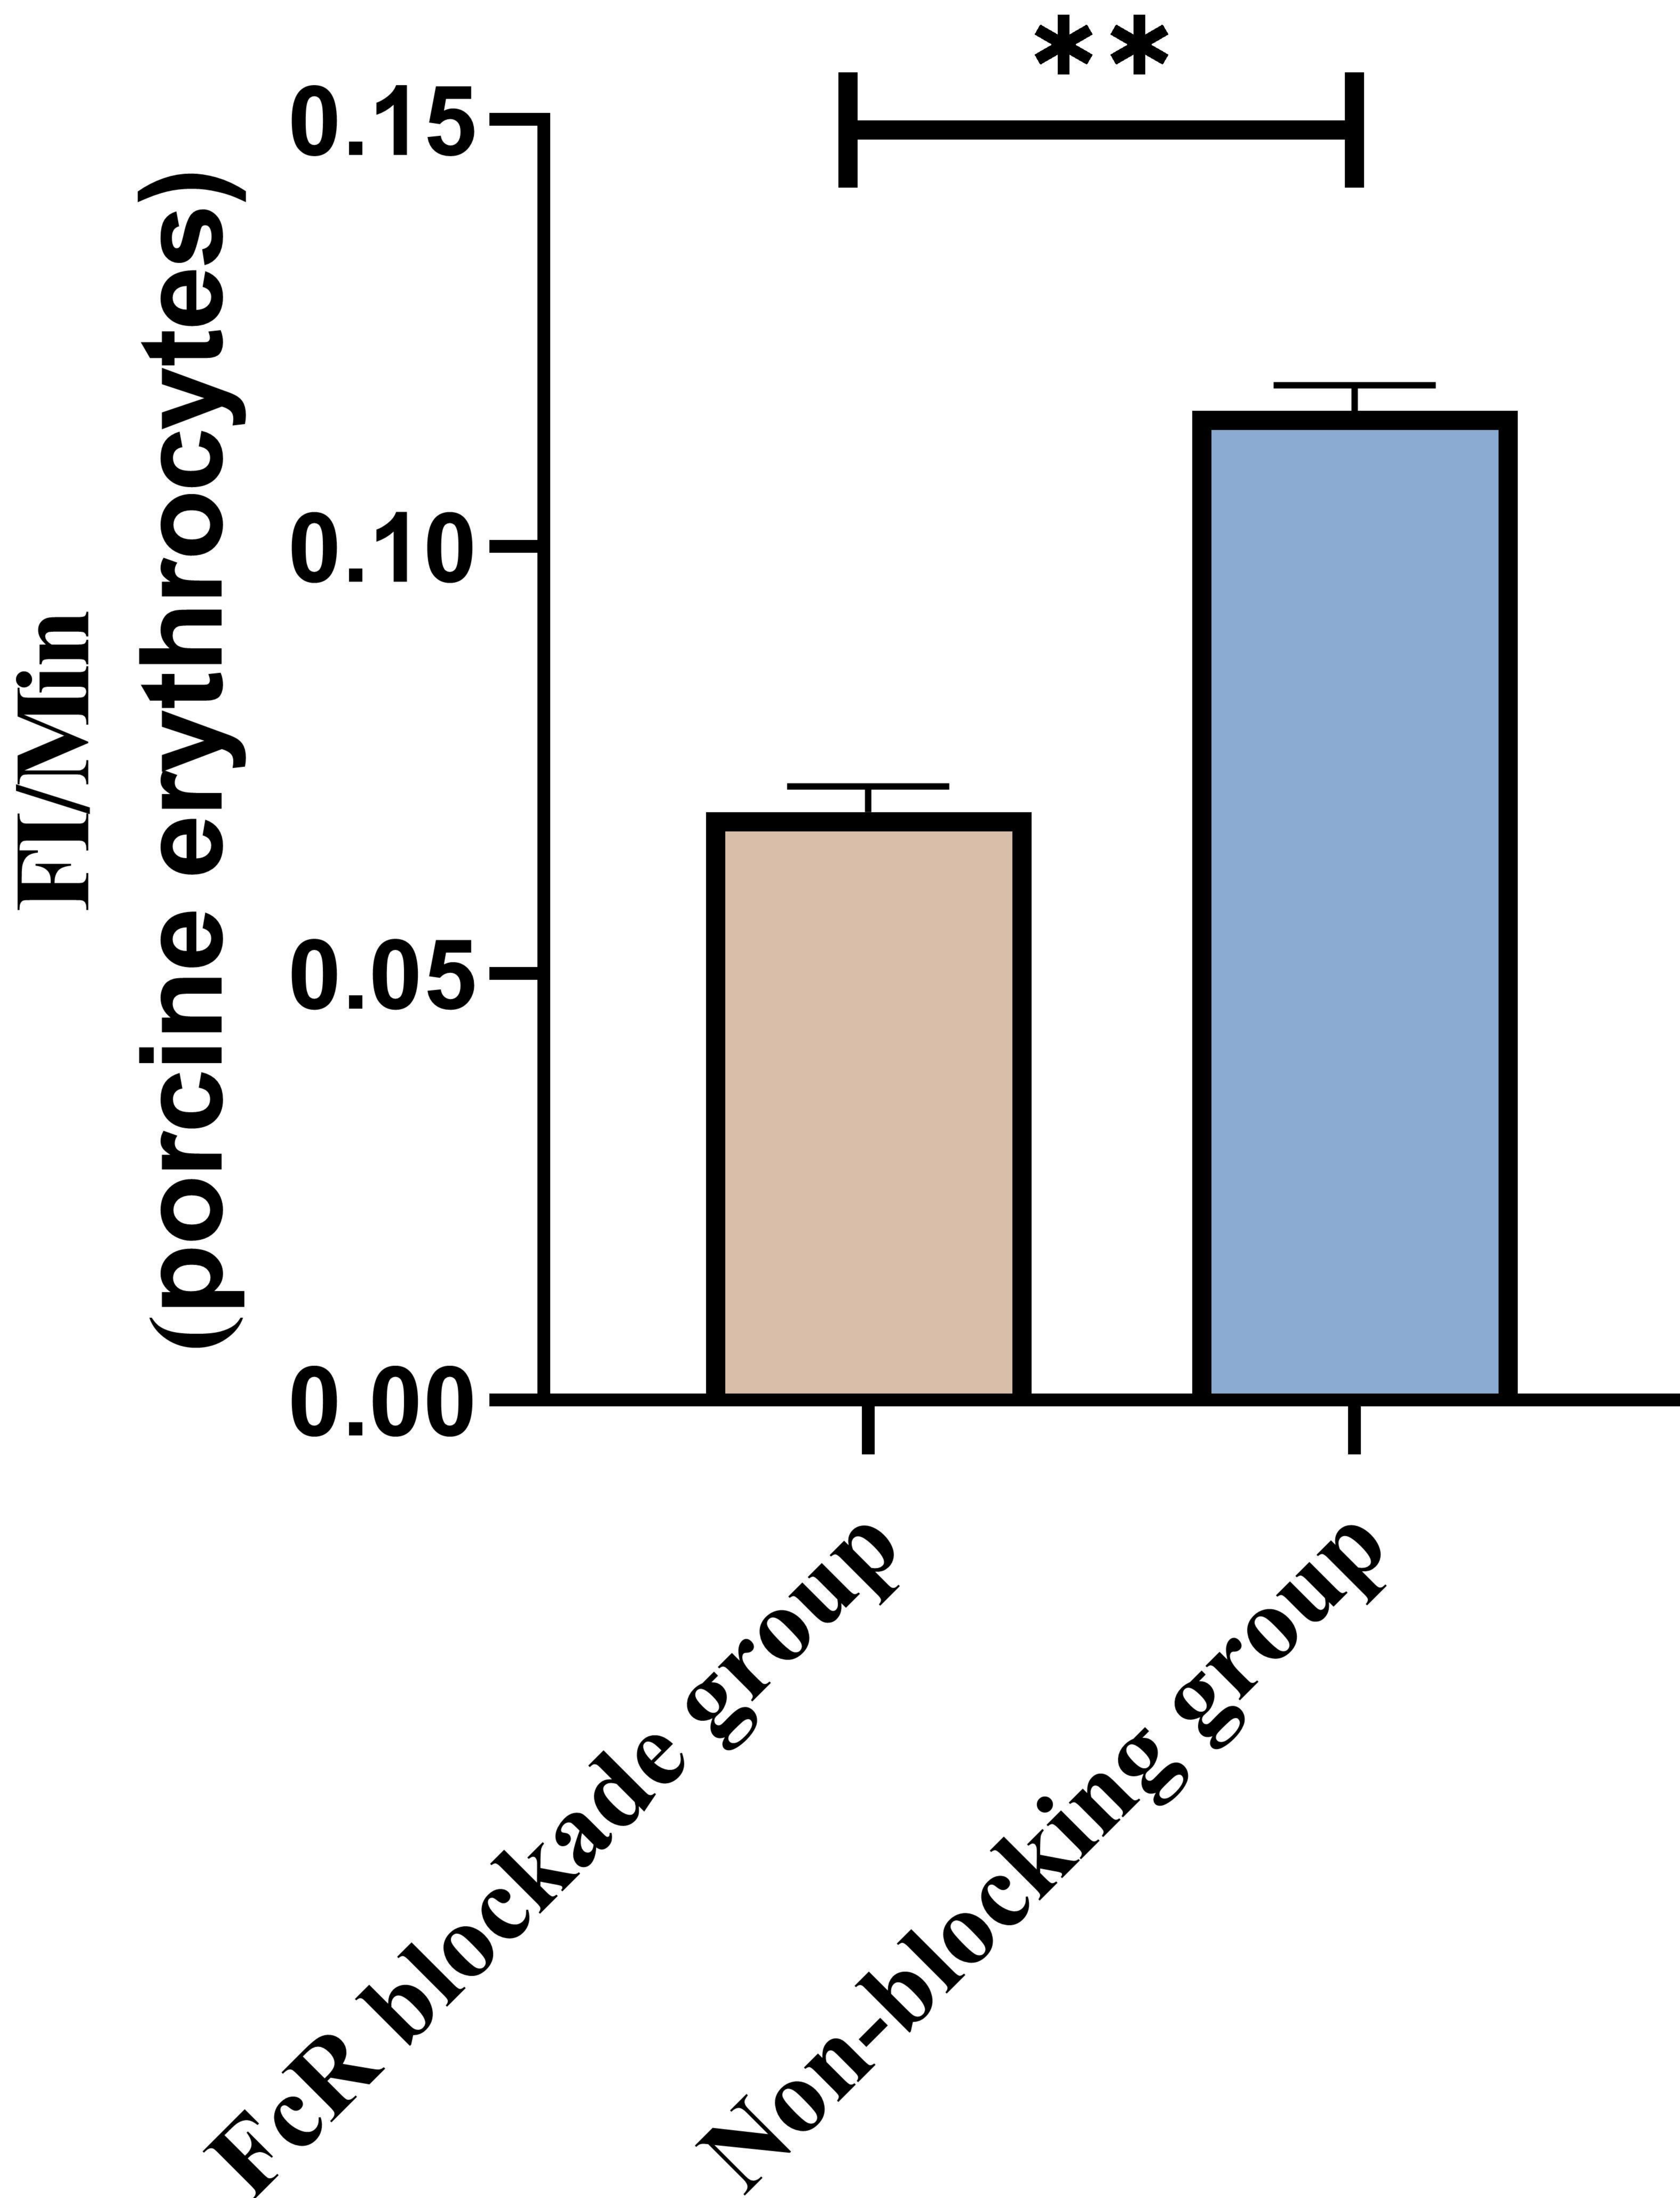

Supplement: Picture_supplement.zip [file Picture_supplement.zip]

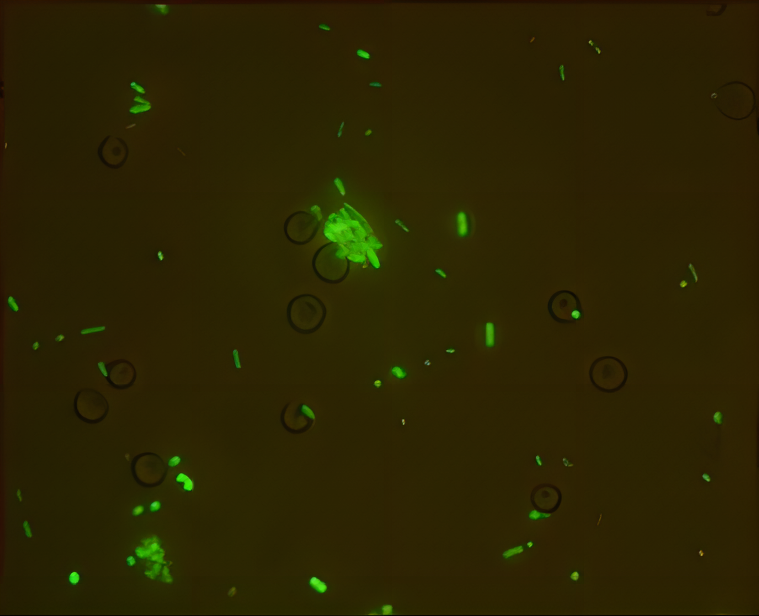

Supplement: Picture_supplement.zip [file Picture_supplement.zip]

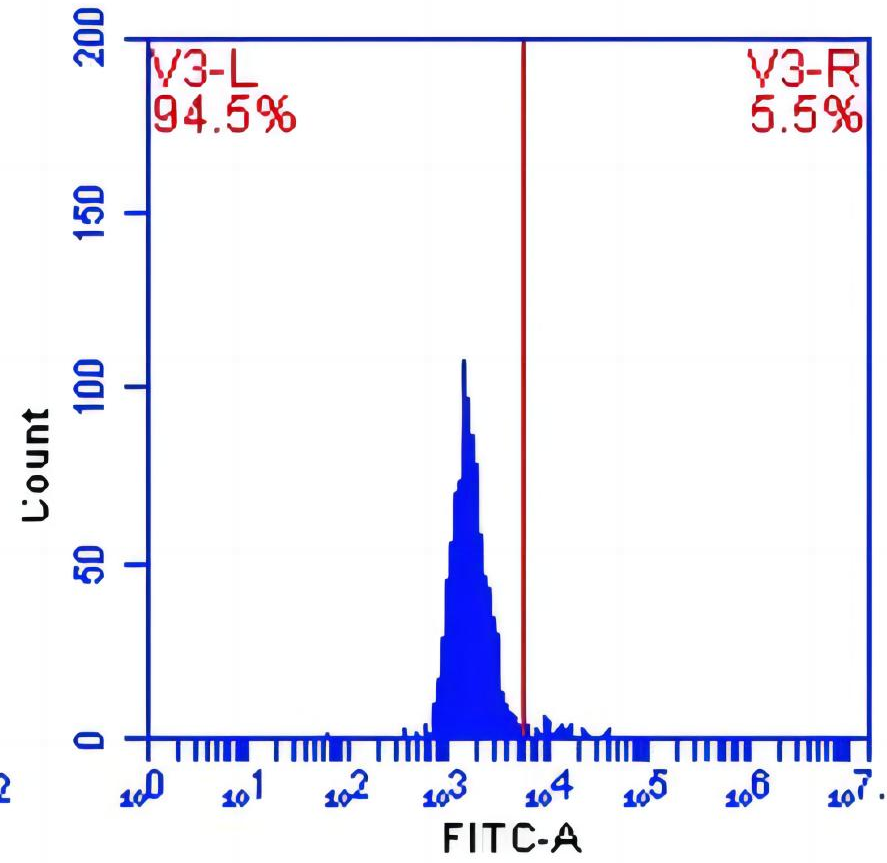

Supplement: Picture_supplement.zip [file Picture_supplement.zip]



Supplement: Picture_supplement.zip [file Picture_supplement.zip]

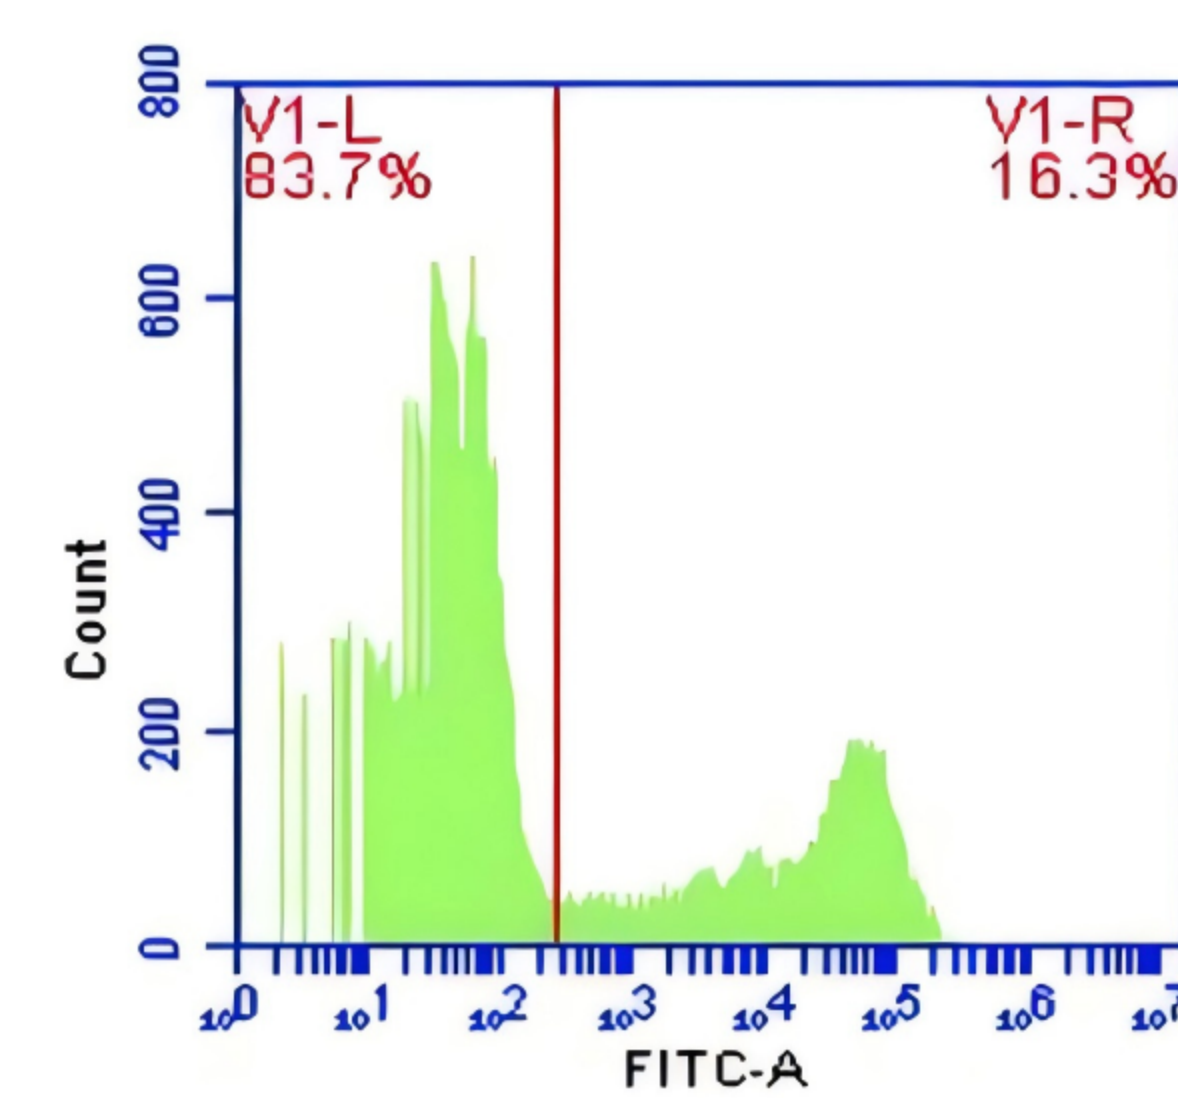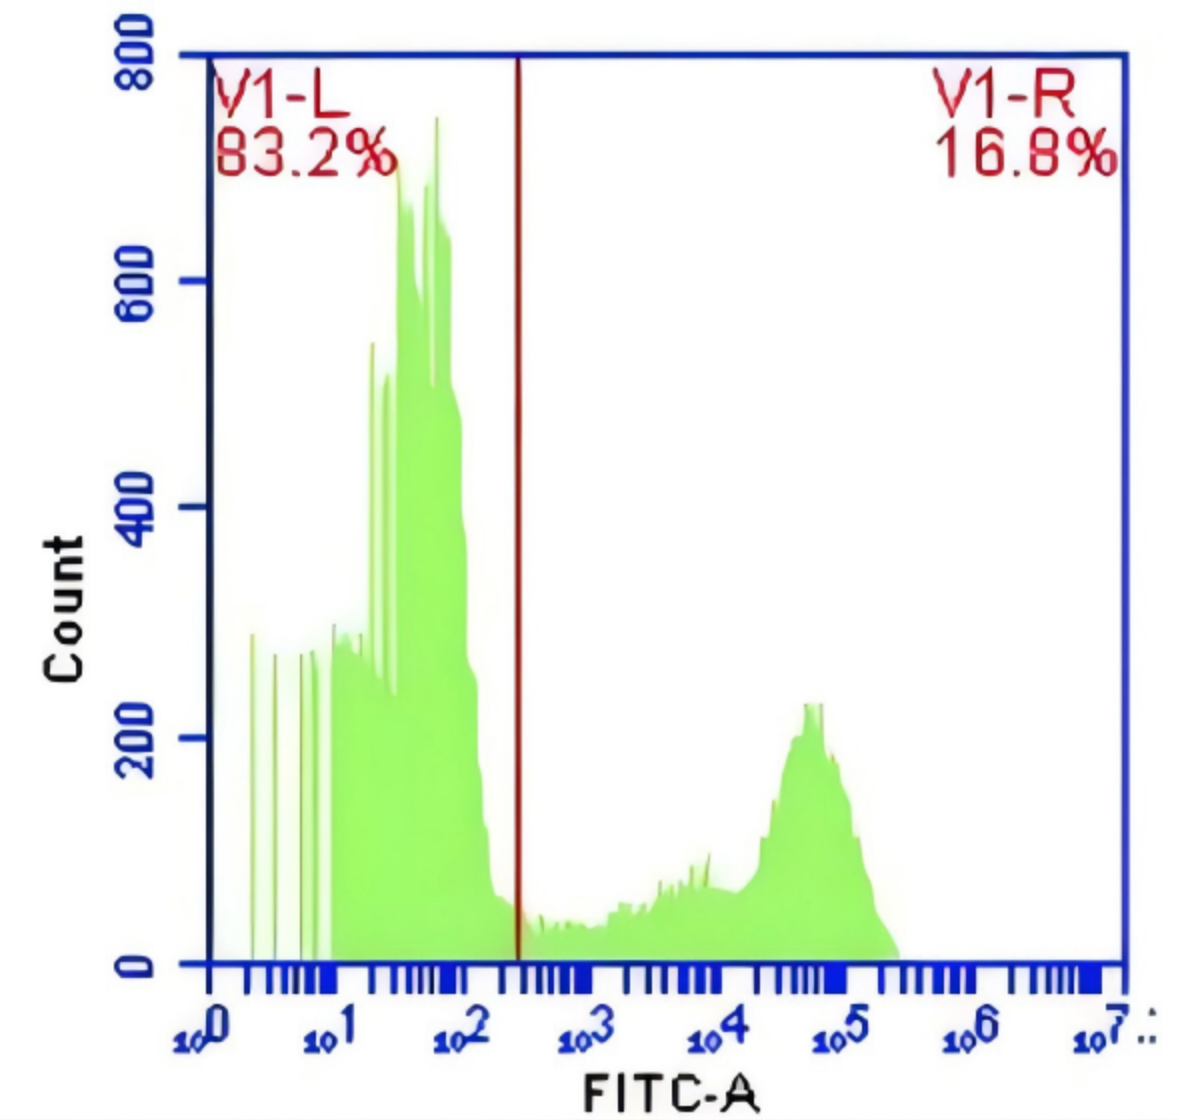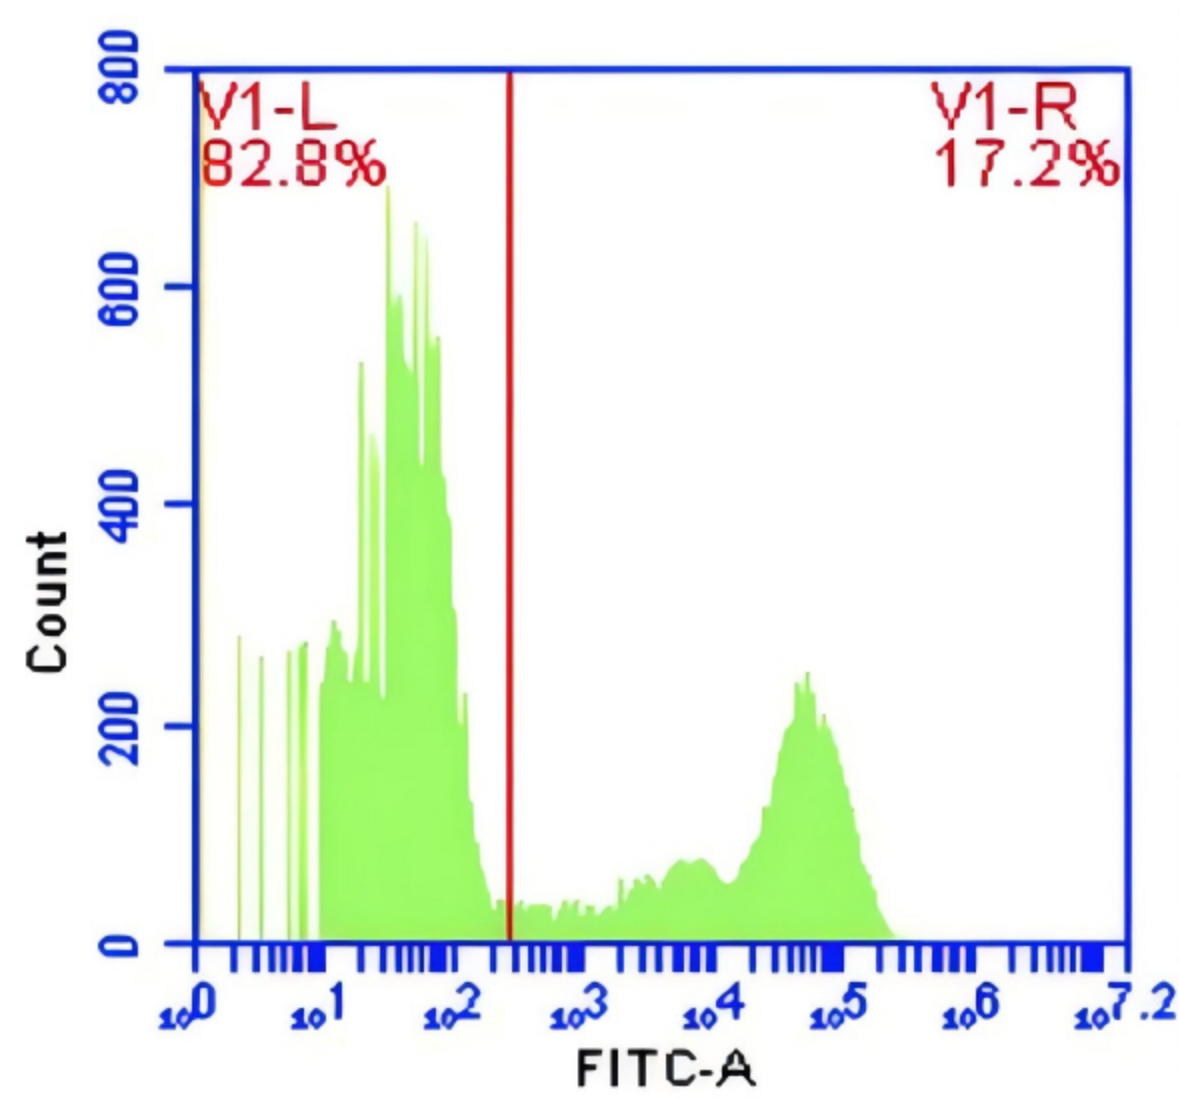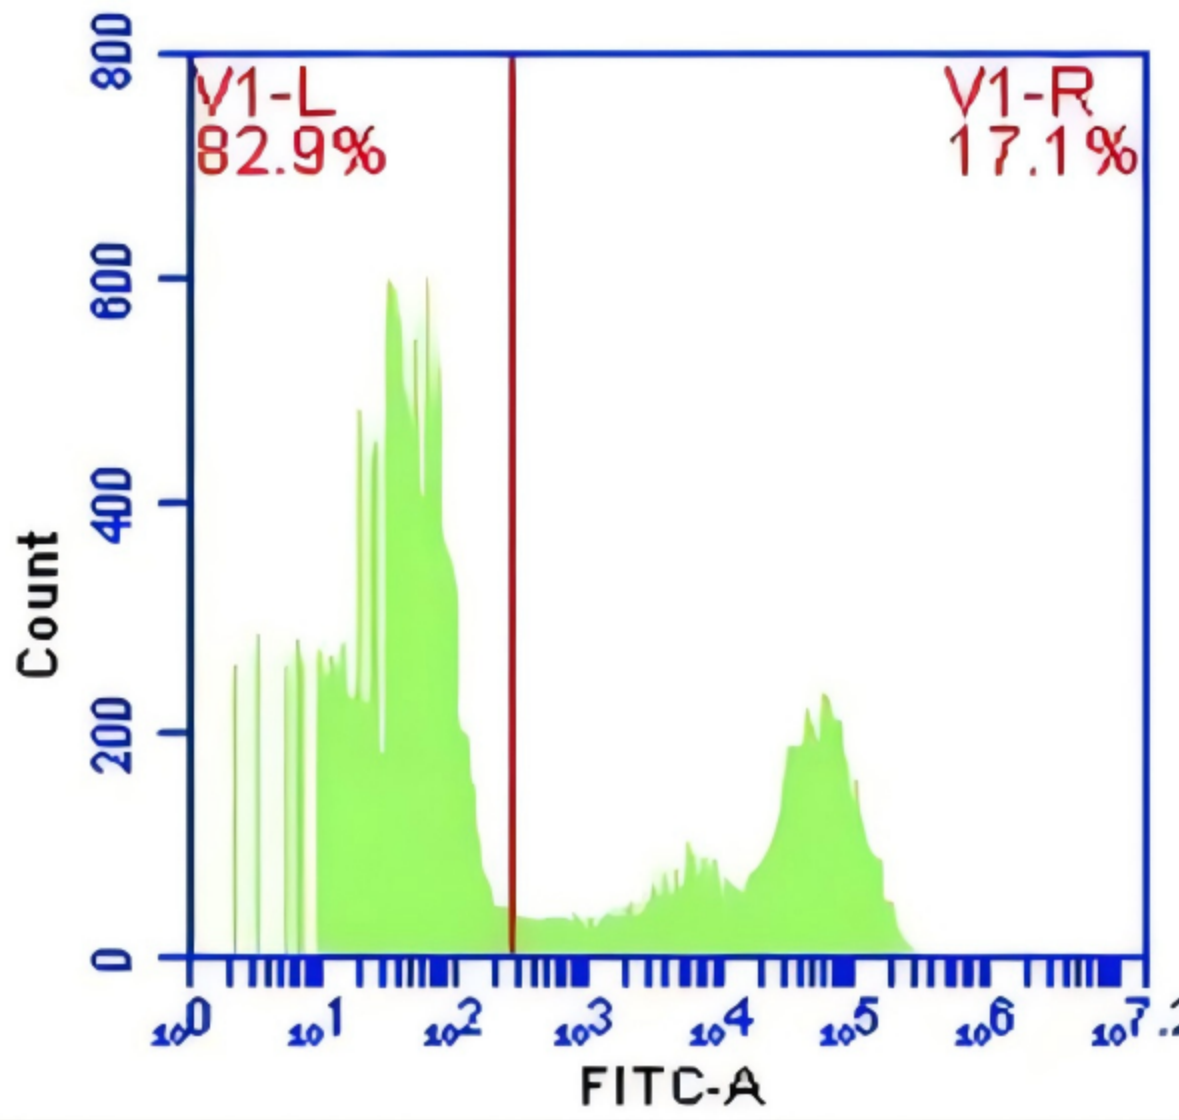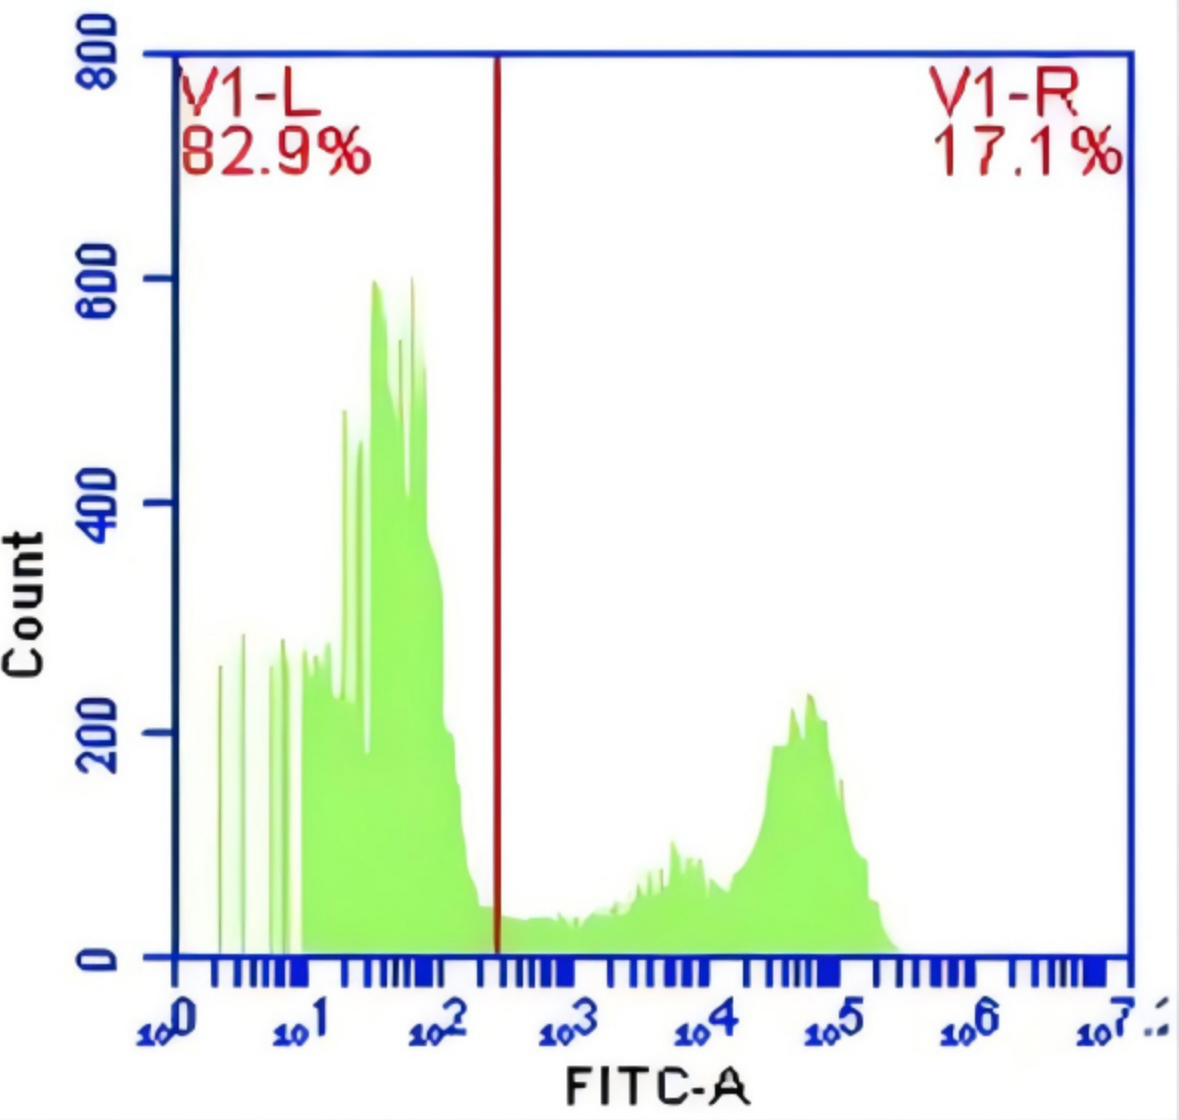

Supplement: Picture_supplement.zip [file Picture_supplement.zip]

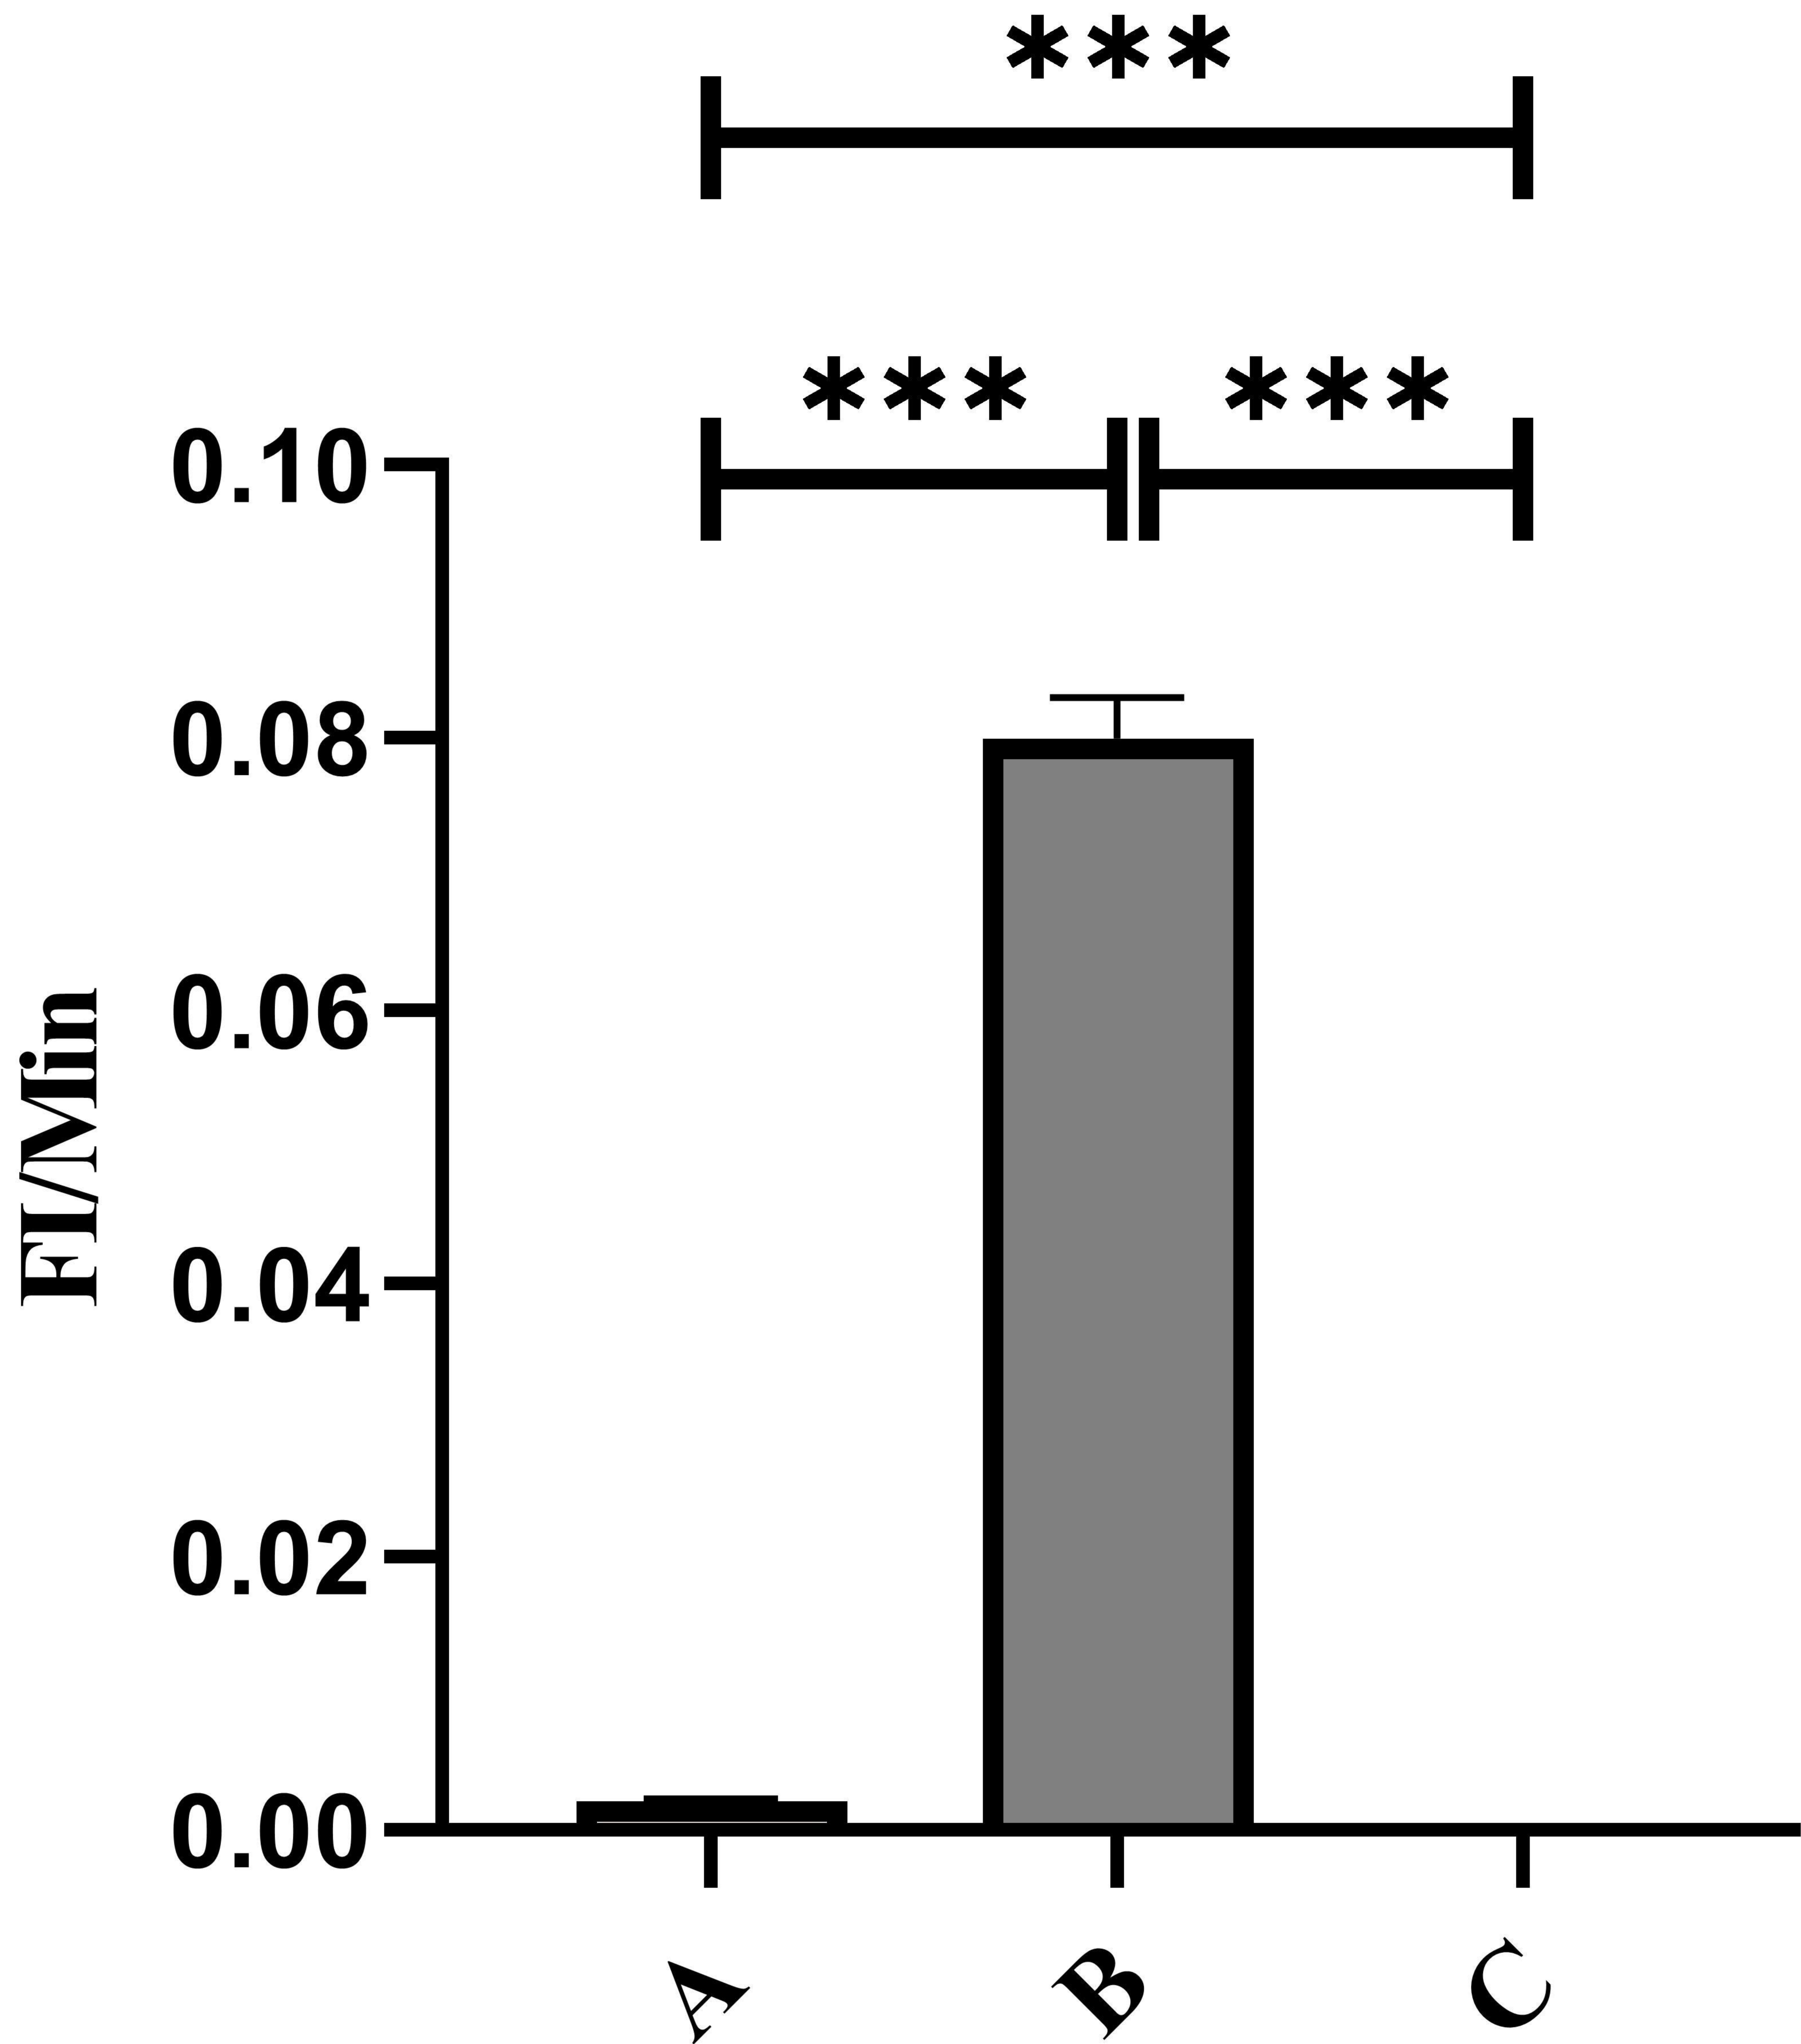

Supplement: Picture_supplement.zip [file Picture_supplement.zip]

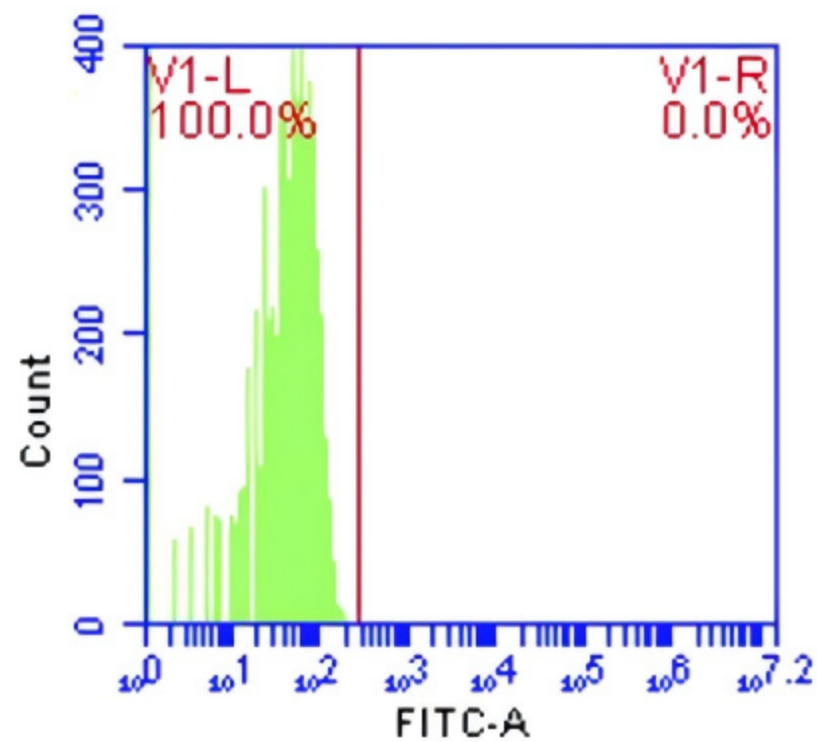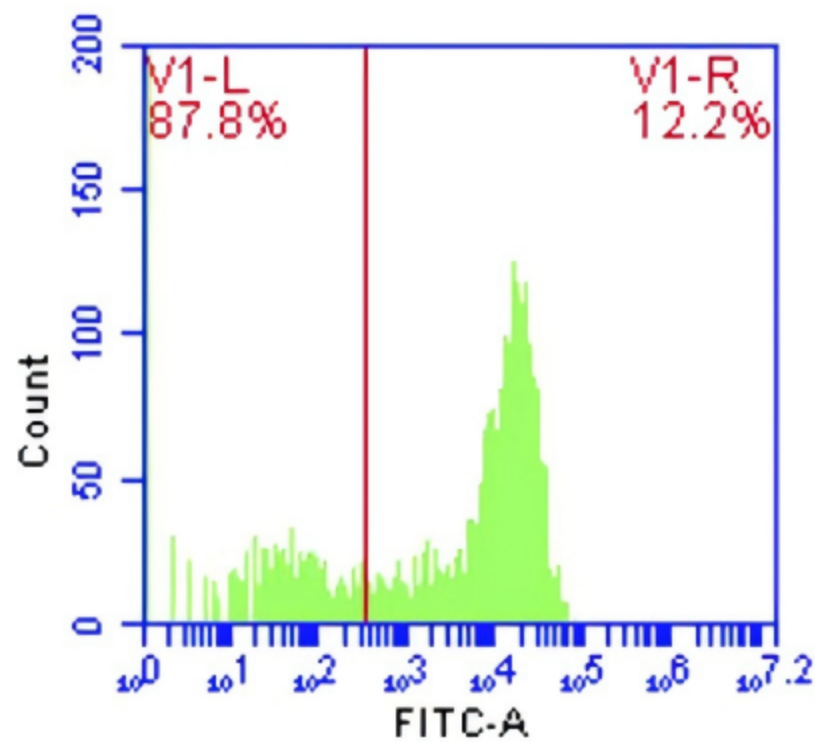

Supplement: Picture_supplement.zip [file Picture_supplement.zip]



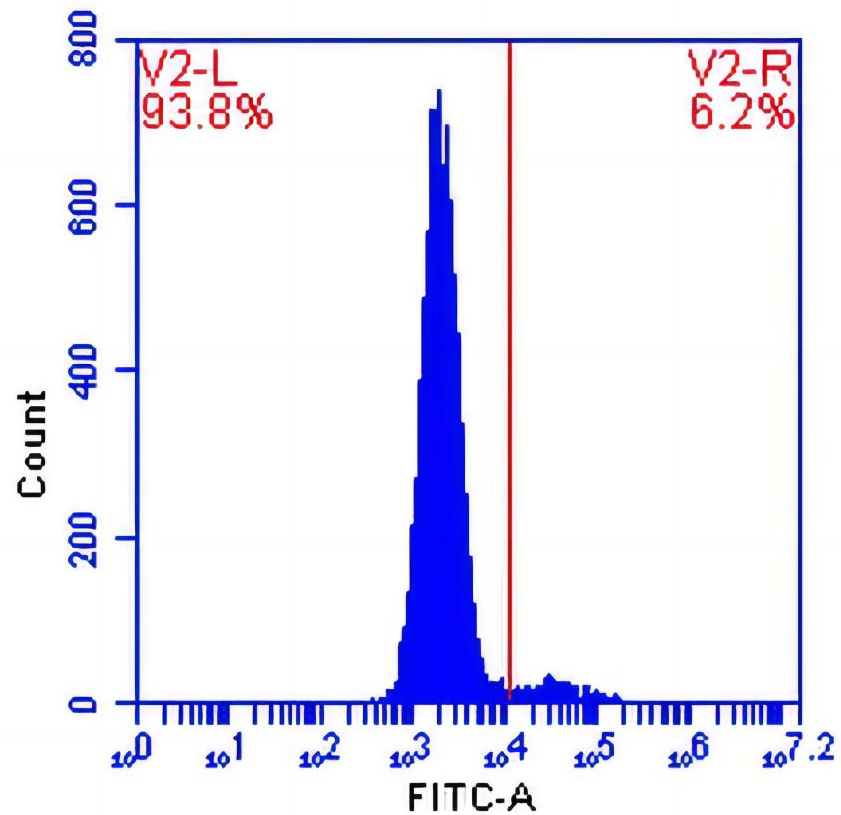

Supplement: Picture_supplement.zip [file Picture_supplement.zip]

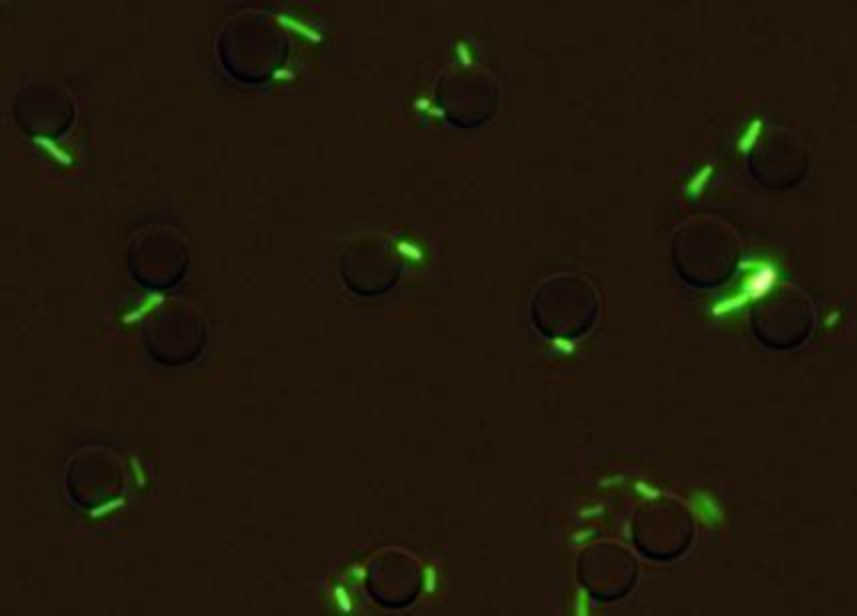

Supplement: Picture_supplement.zip [file Picture_supplement.zip]

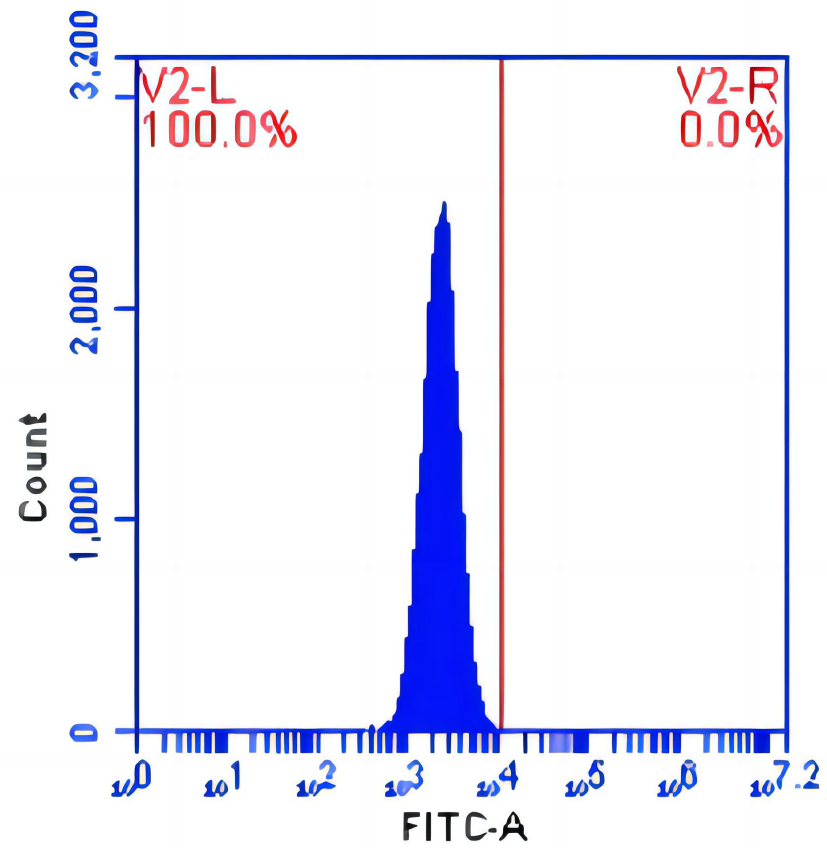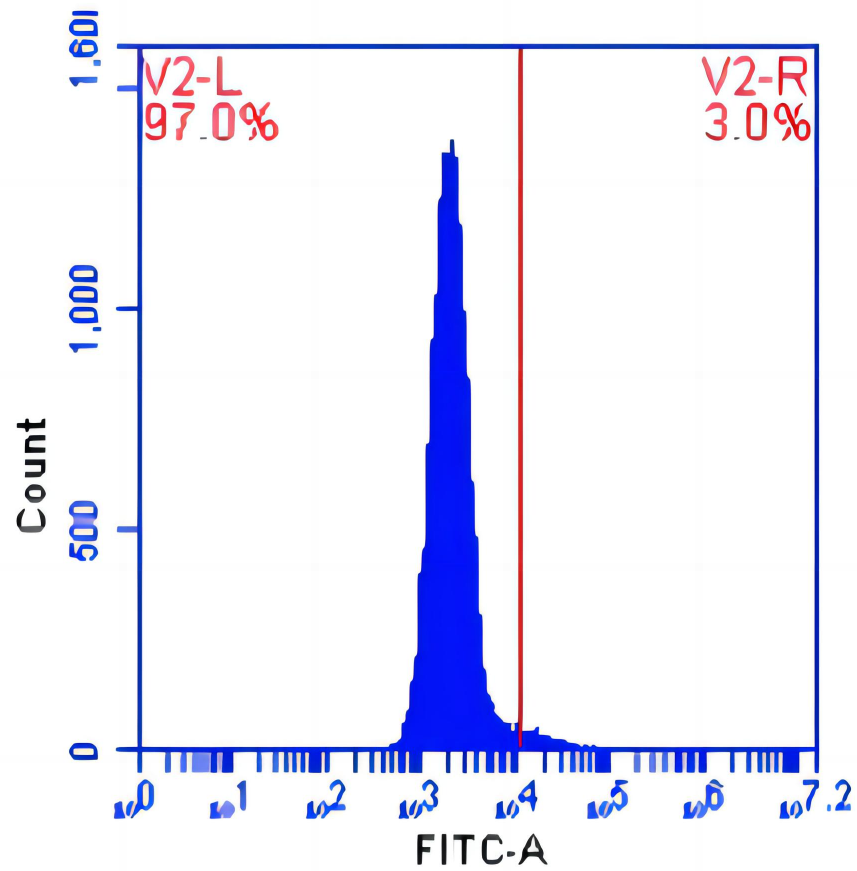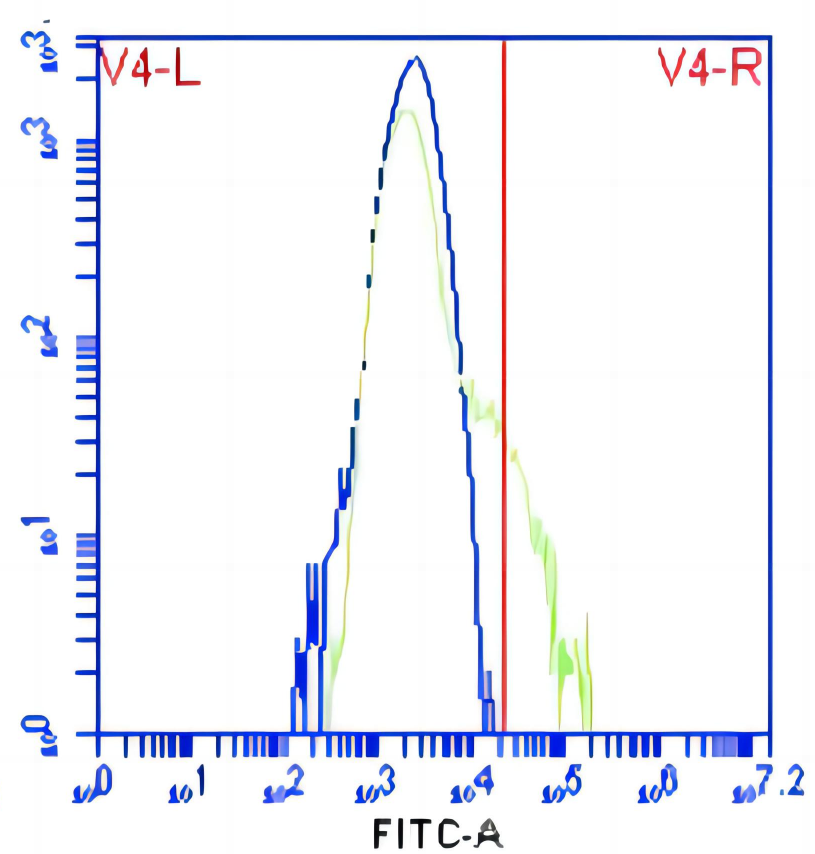

Supplement: Picture_supplement.zip [file Picture_supplement.zip]

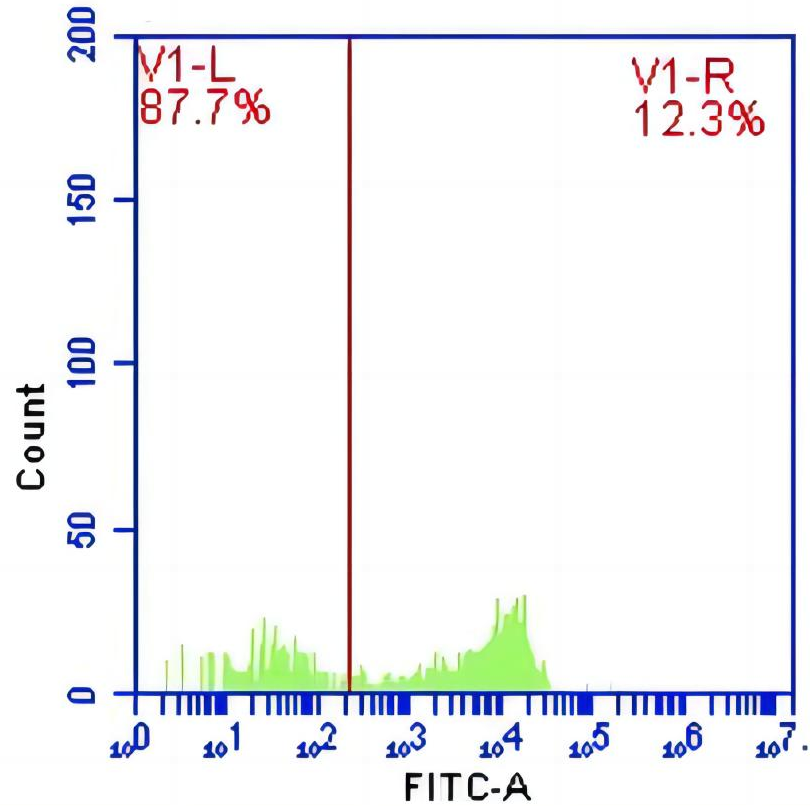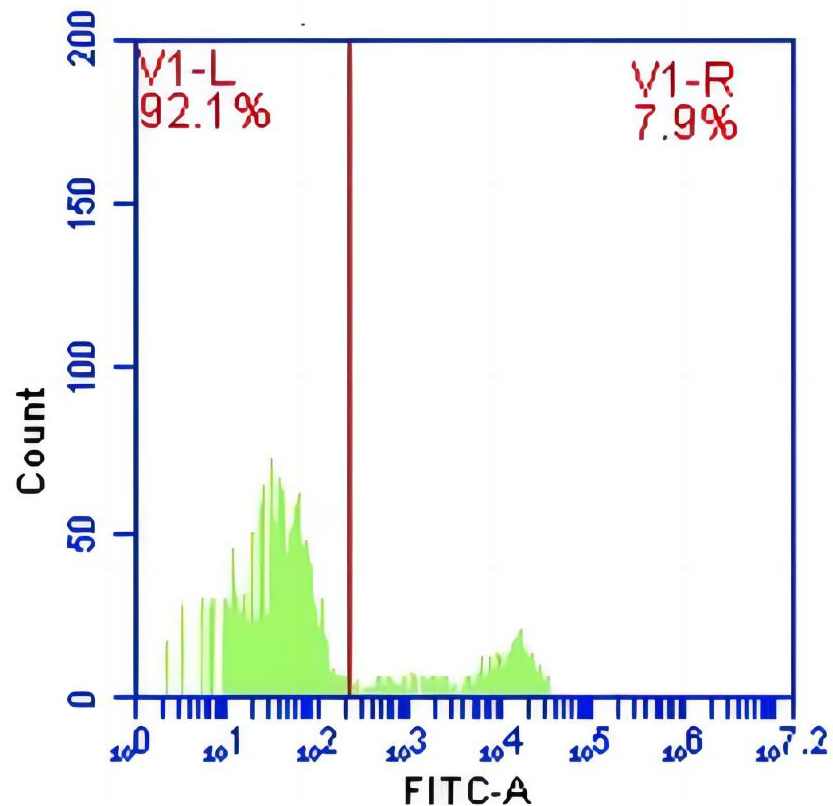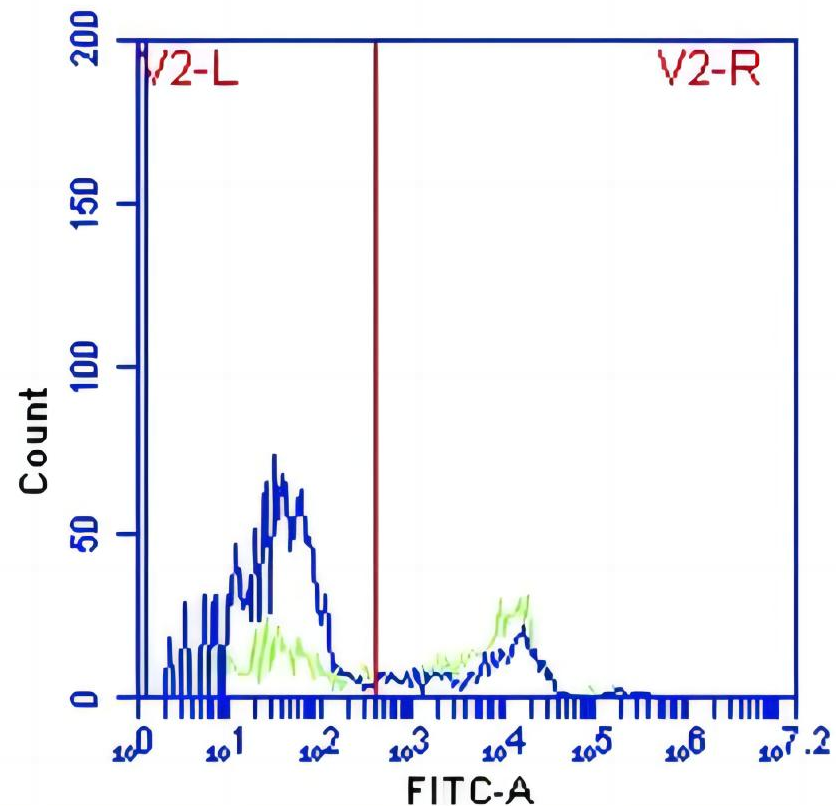

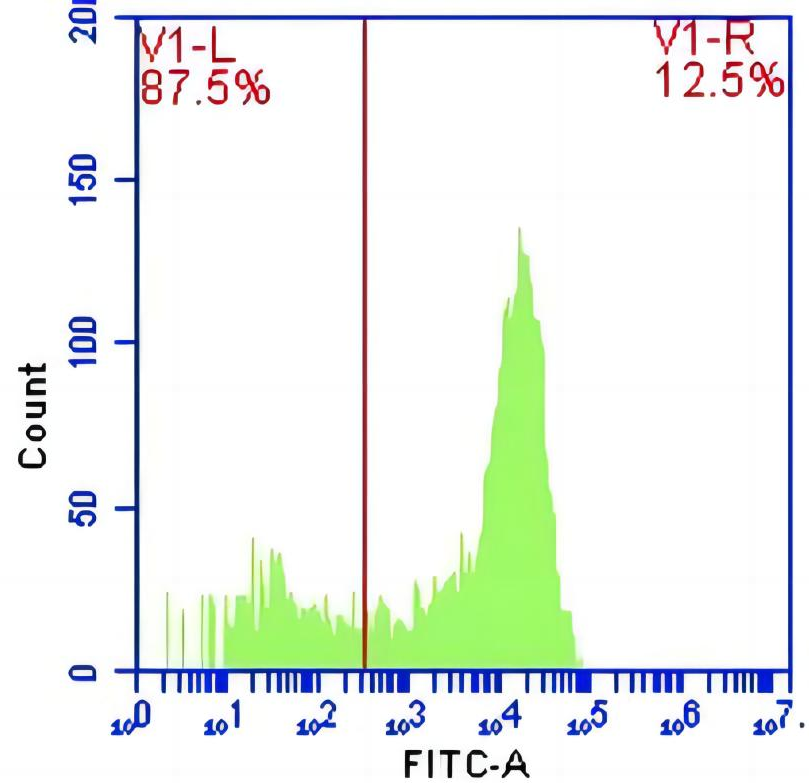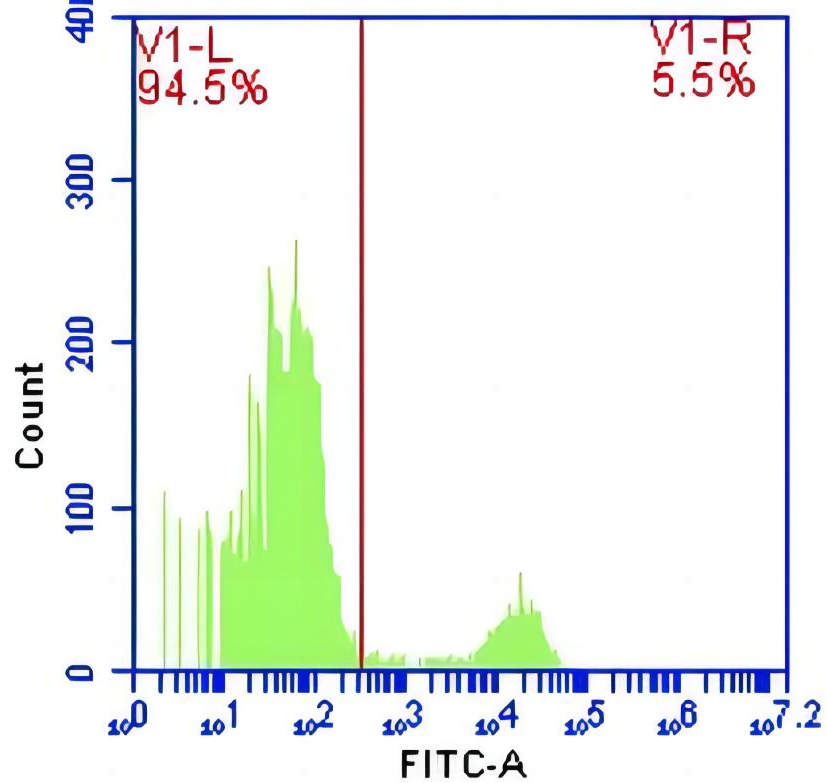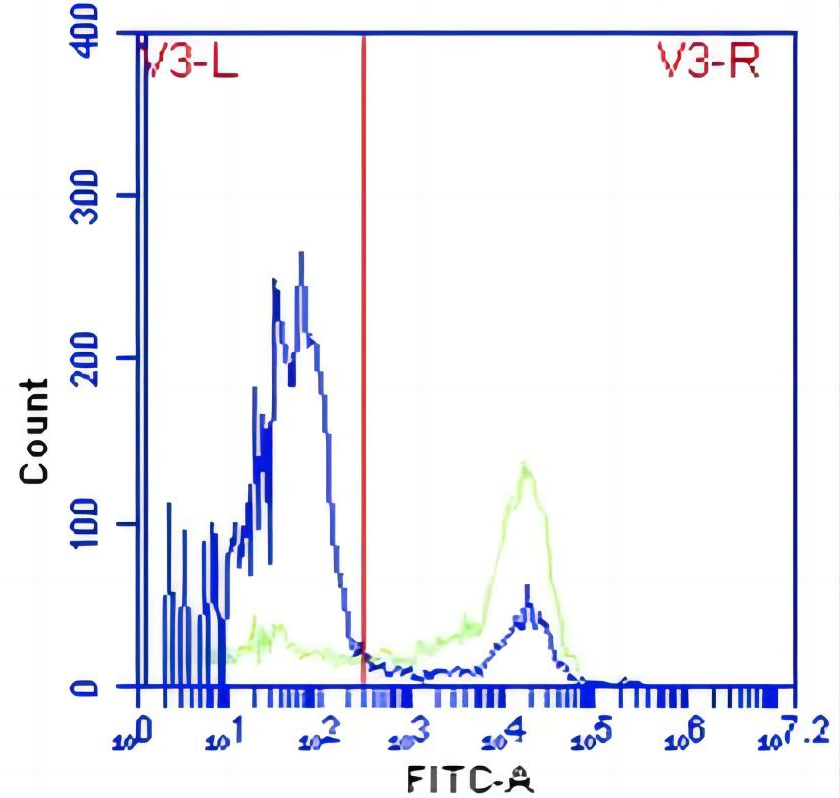

Supplement: Picture_supplement.zip [file Picture_supplement.zip]

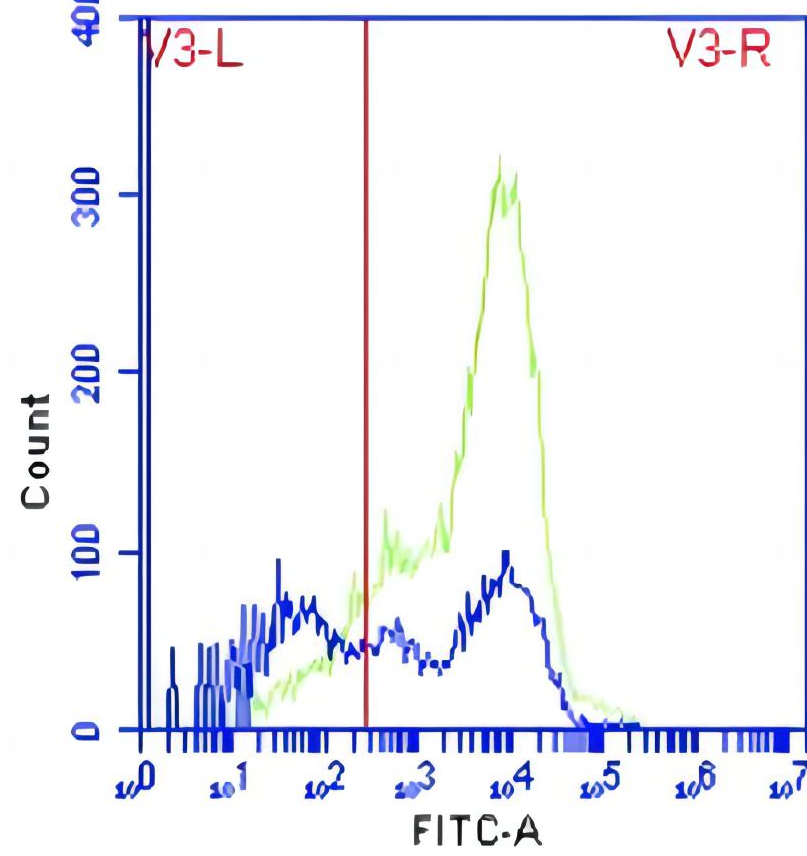

Supplement: Picture_supplement.zip [file Picture_supplement.zip]



Supplement: Picture_supplement.zip [file Picture_supplement.zip]



Supplement: Picture_supplement.zip [file Picture_supplement.zip]

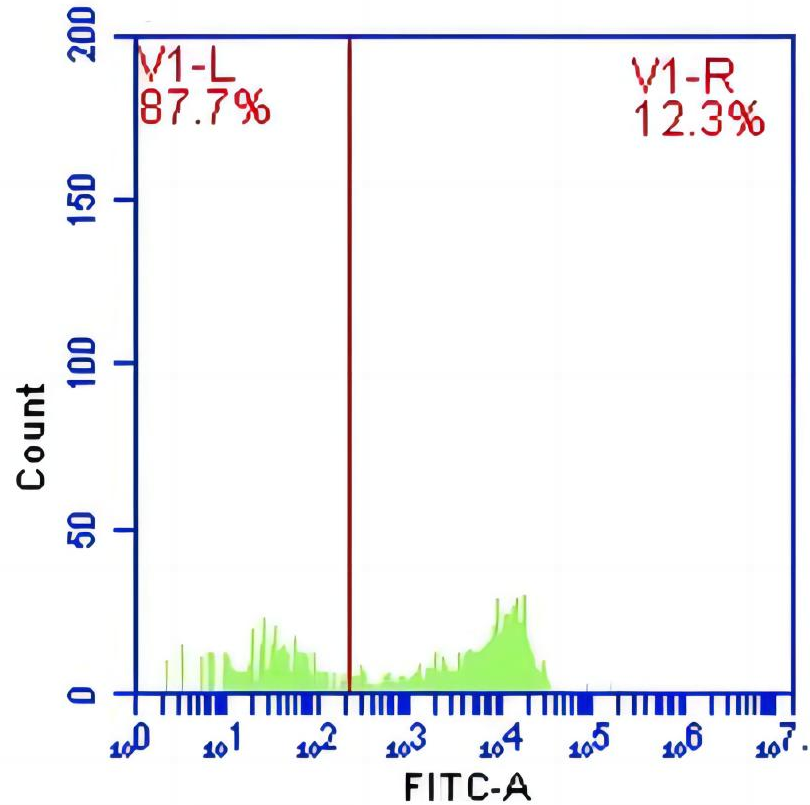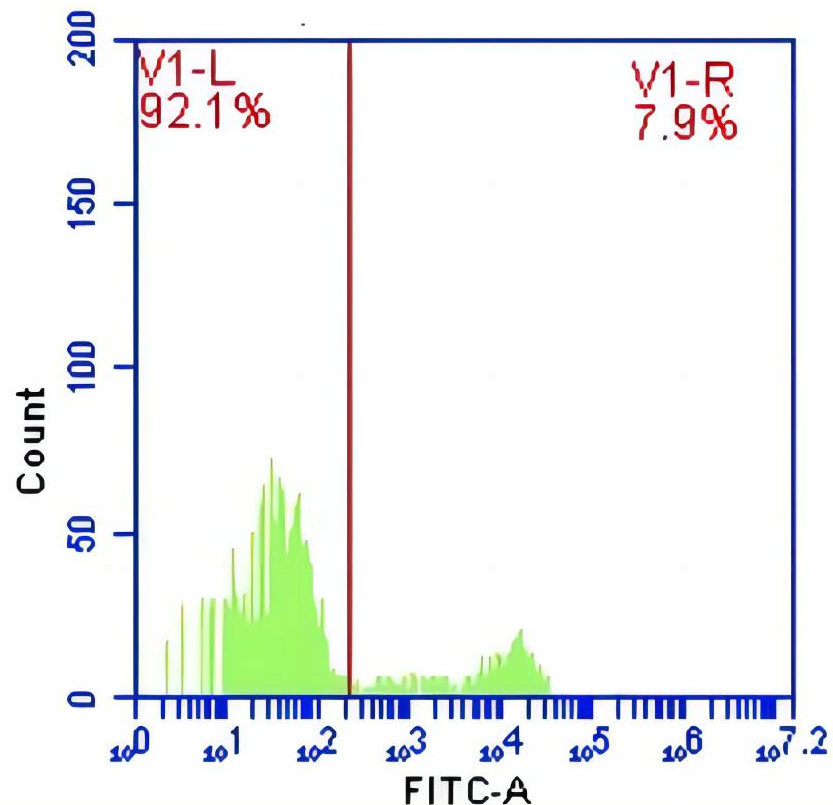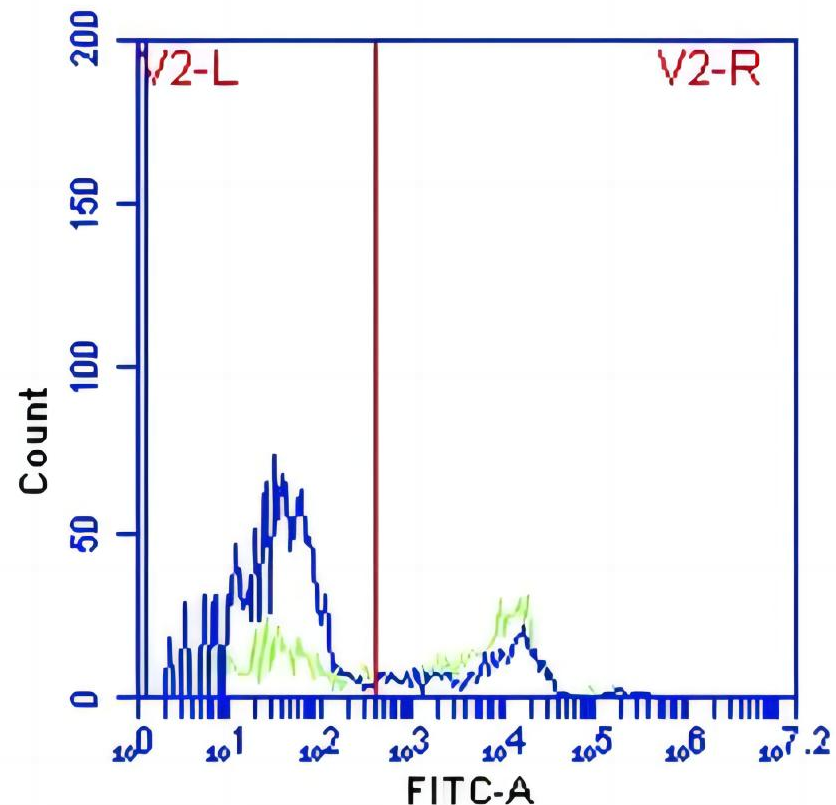

Supplement: Picture_supplement.zip [file Picture_supplement.zip]



Supplement: Picture_supplement.zip [file Picture_supplement.zip]

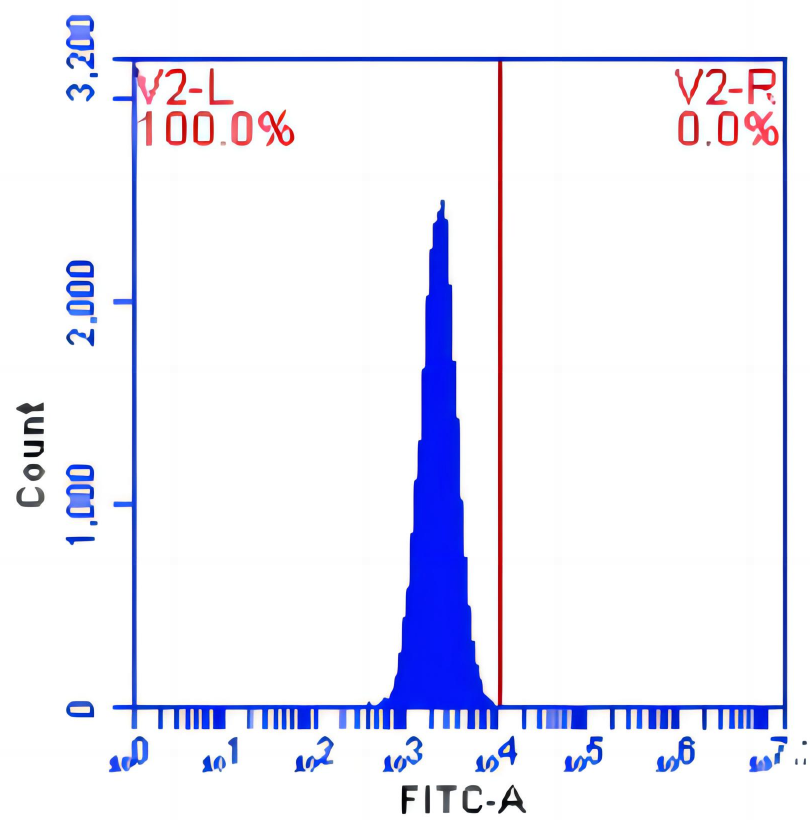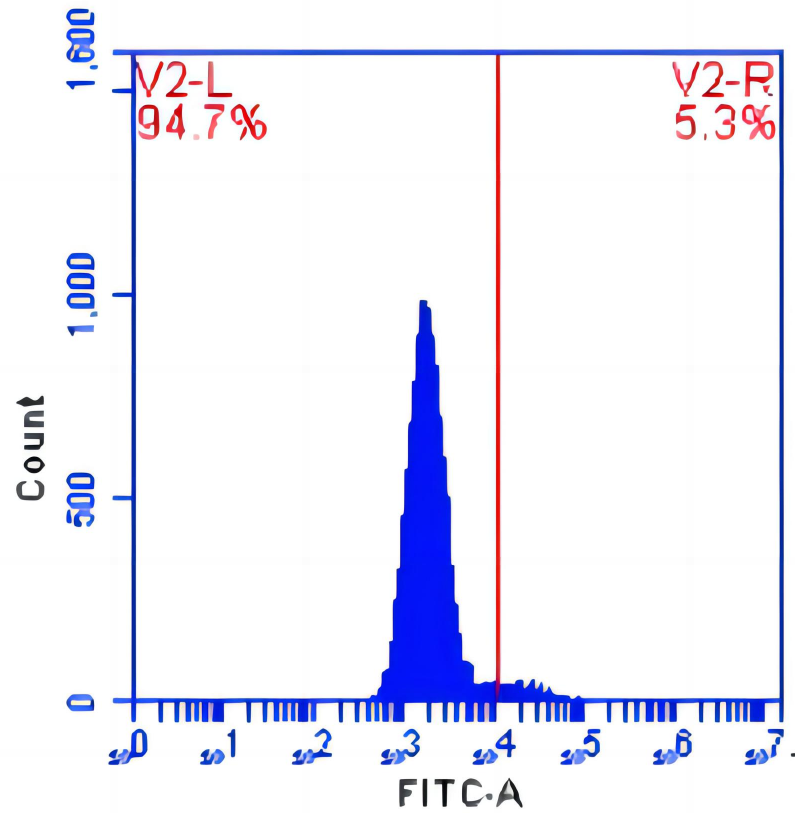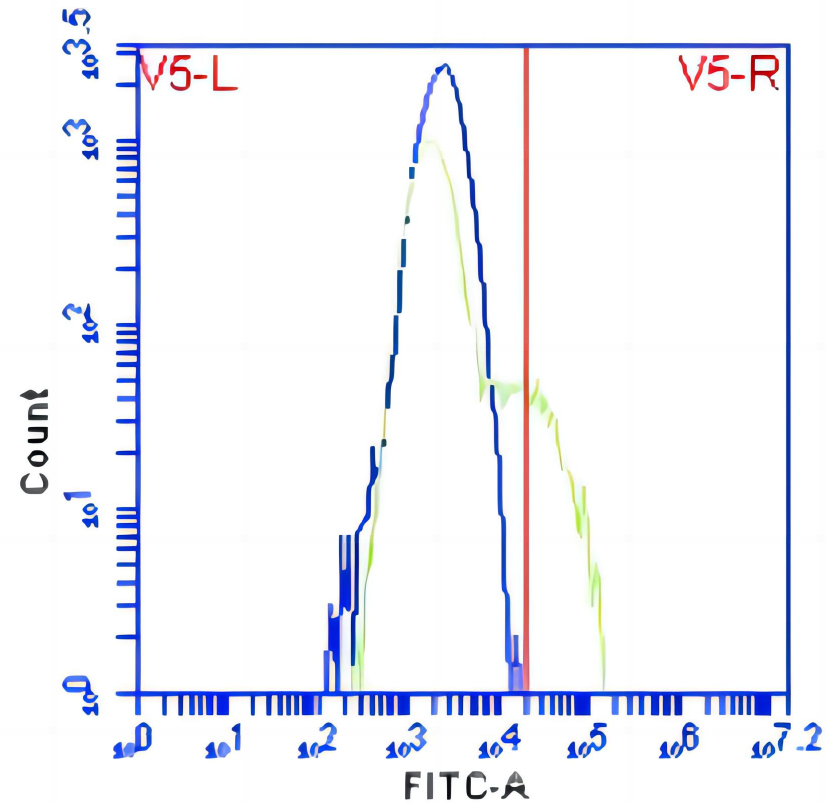

Supplement: Picture_supplement.zip [file Picture_supplement.zip]

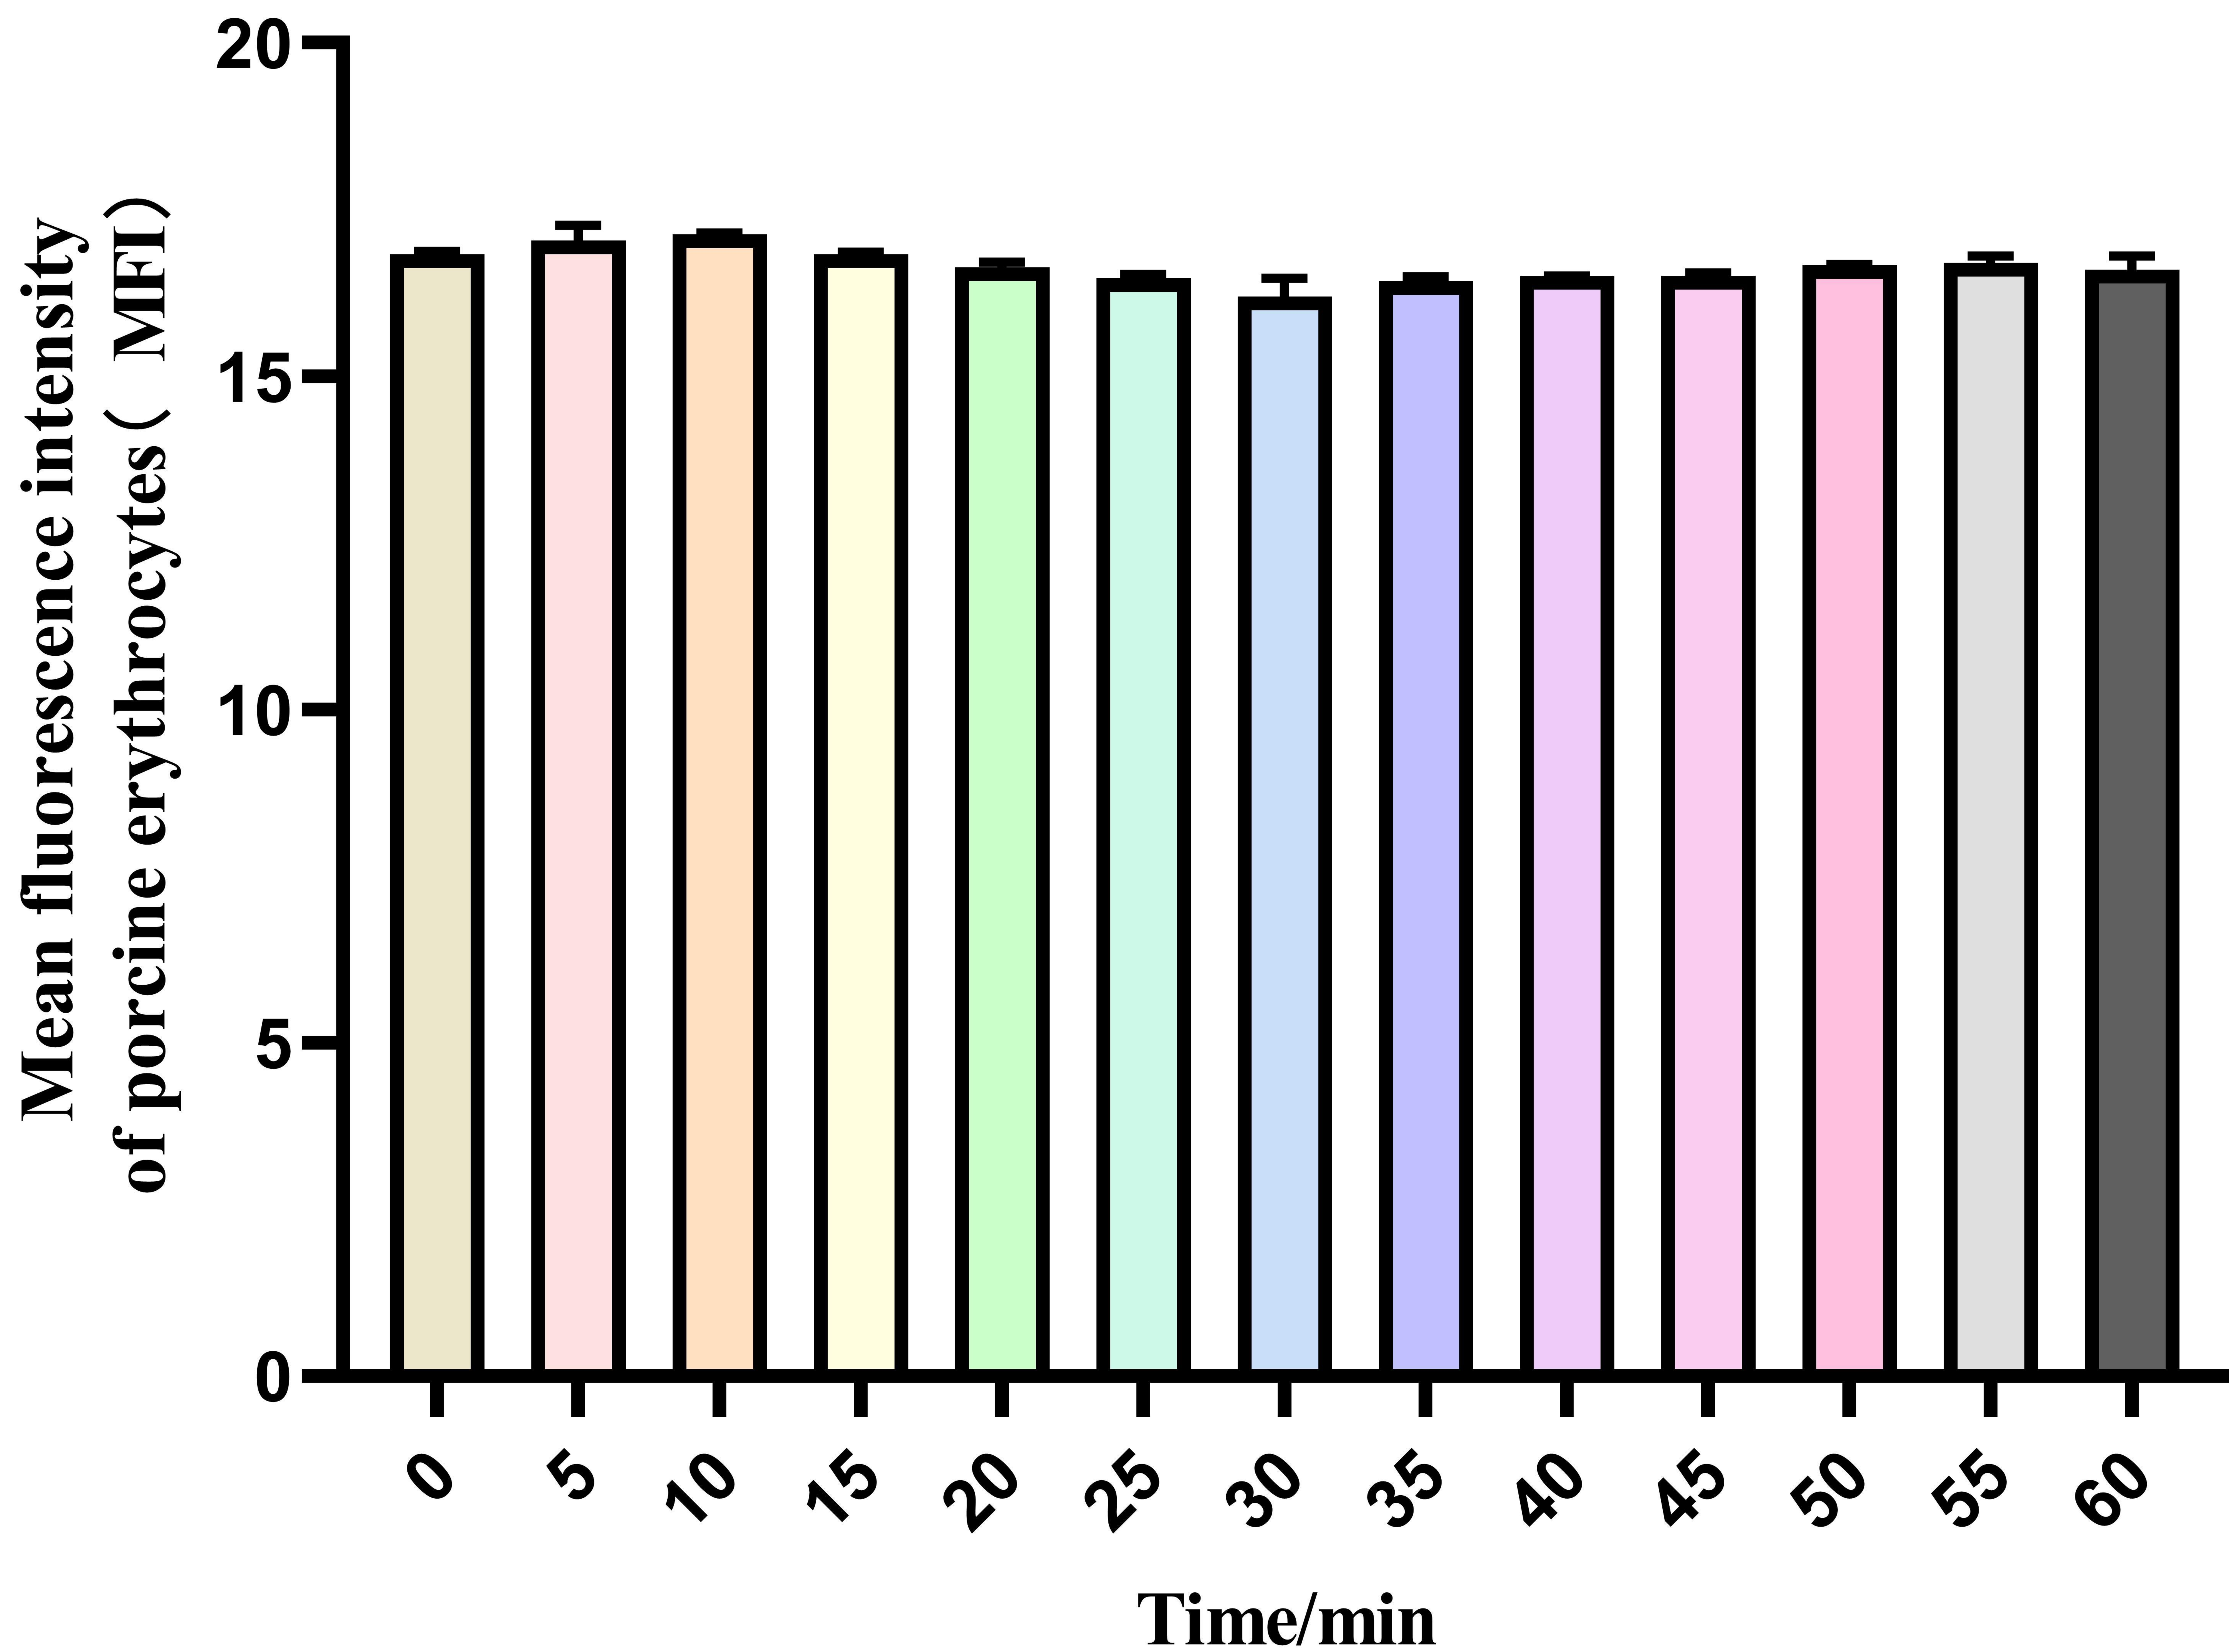

Supplement: Picture_supplement.zip [file Picture_supplement.zip]

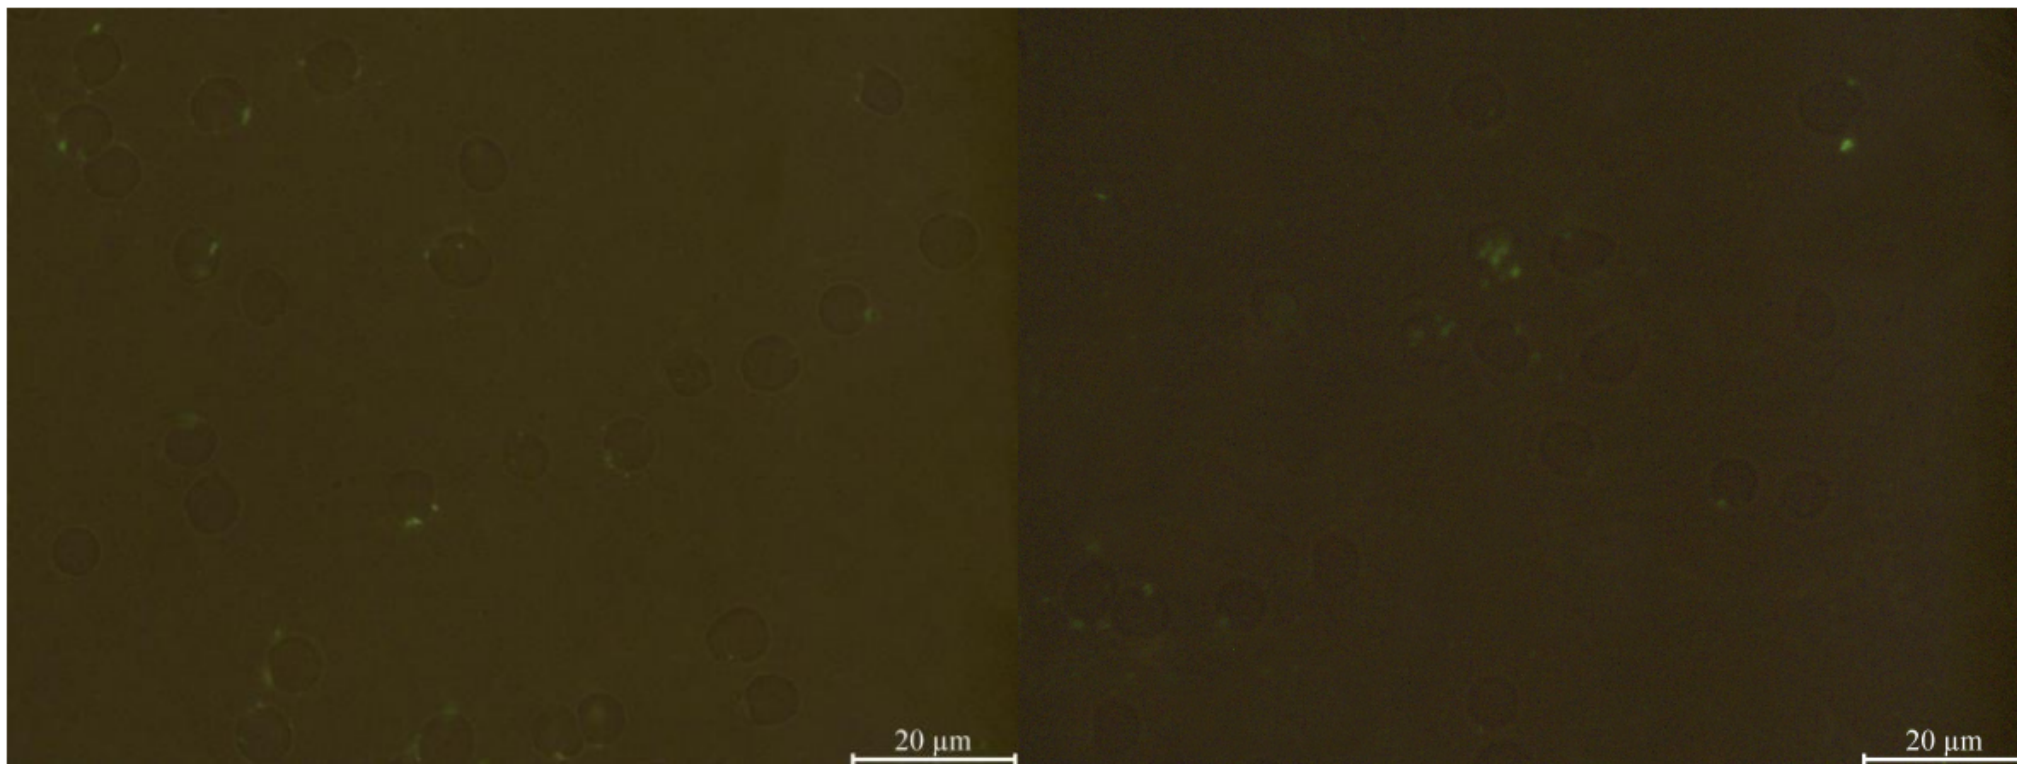

Supplement: Picture_supplement.zip [file Picture_supplement.zip]

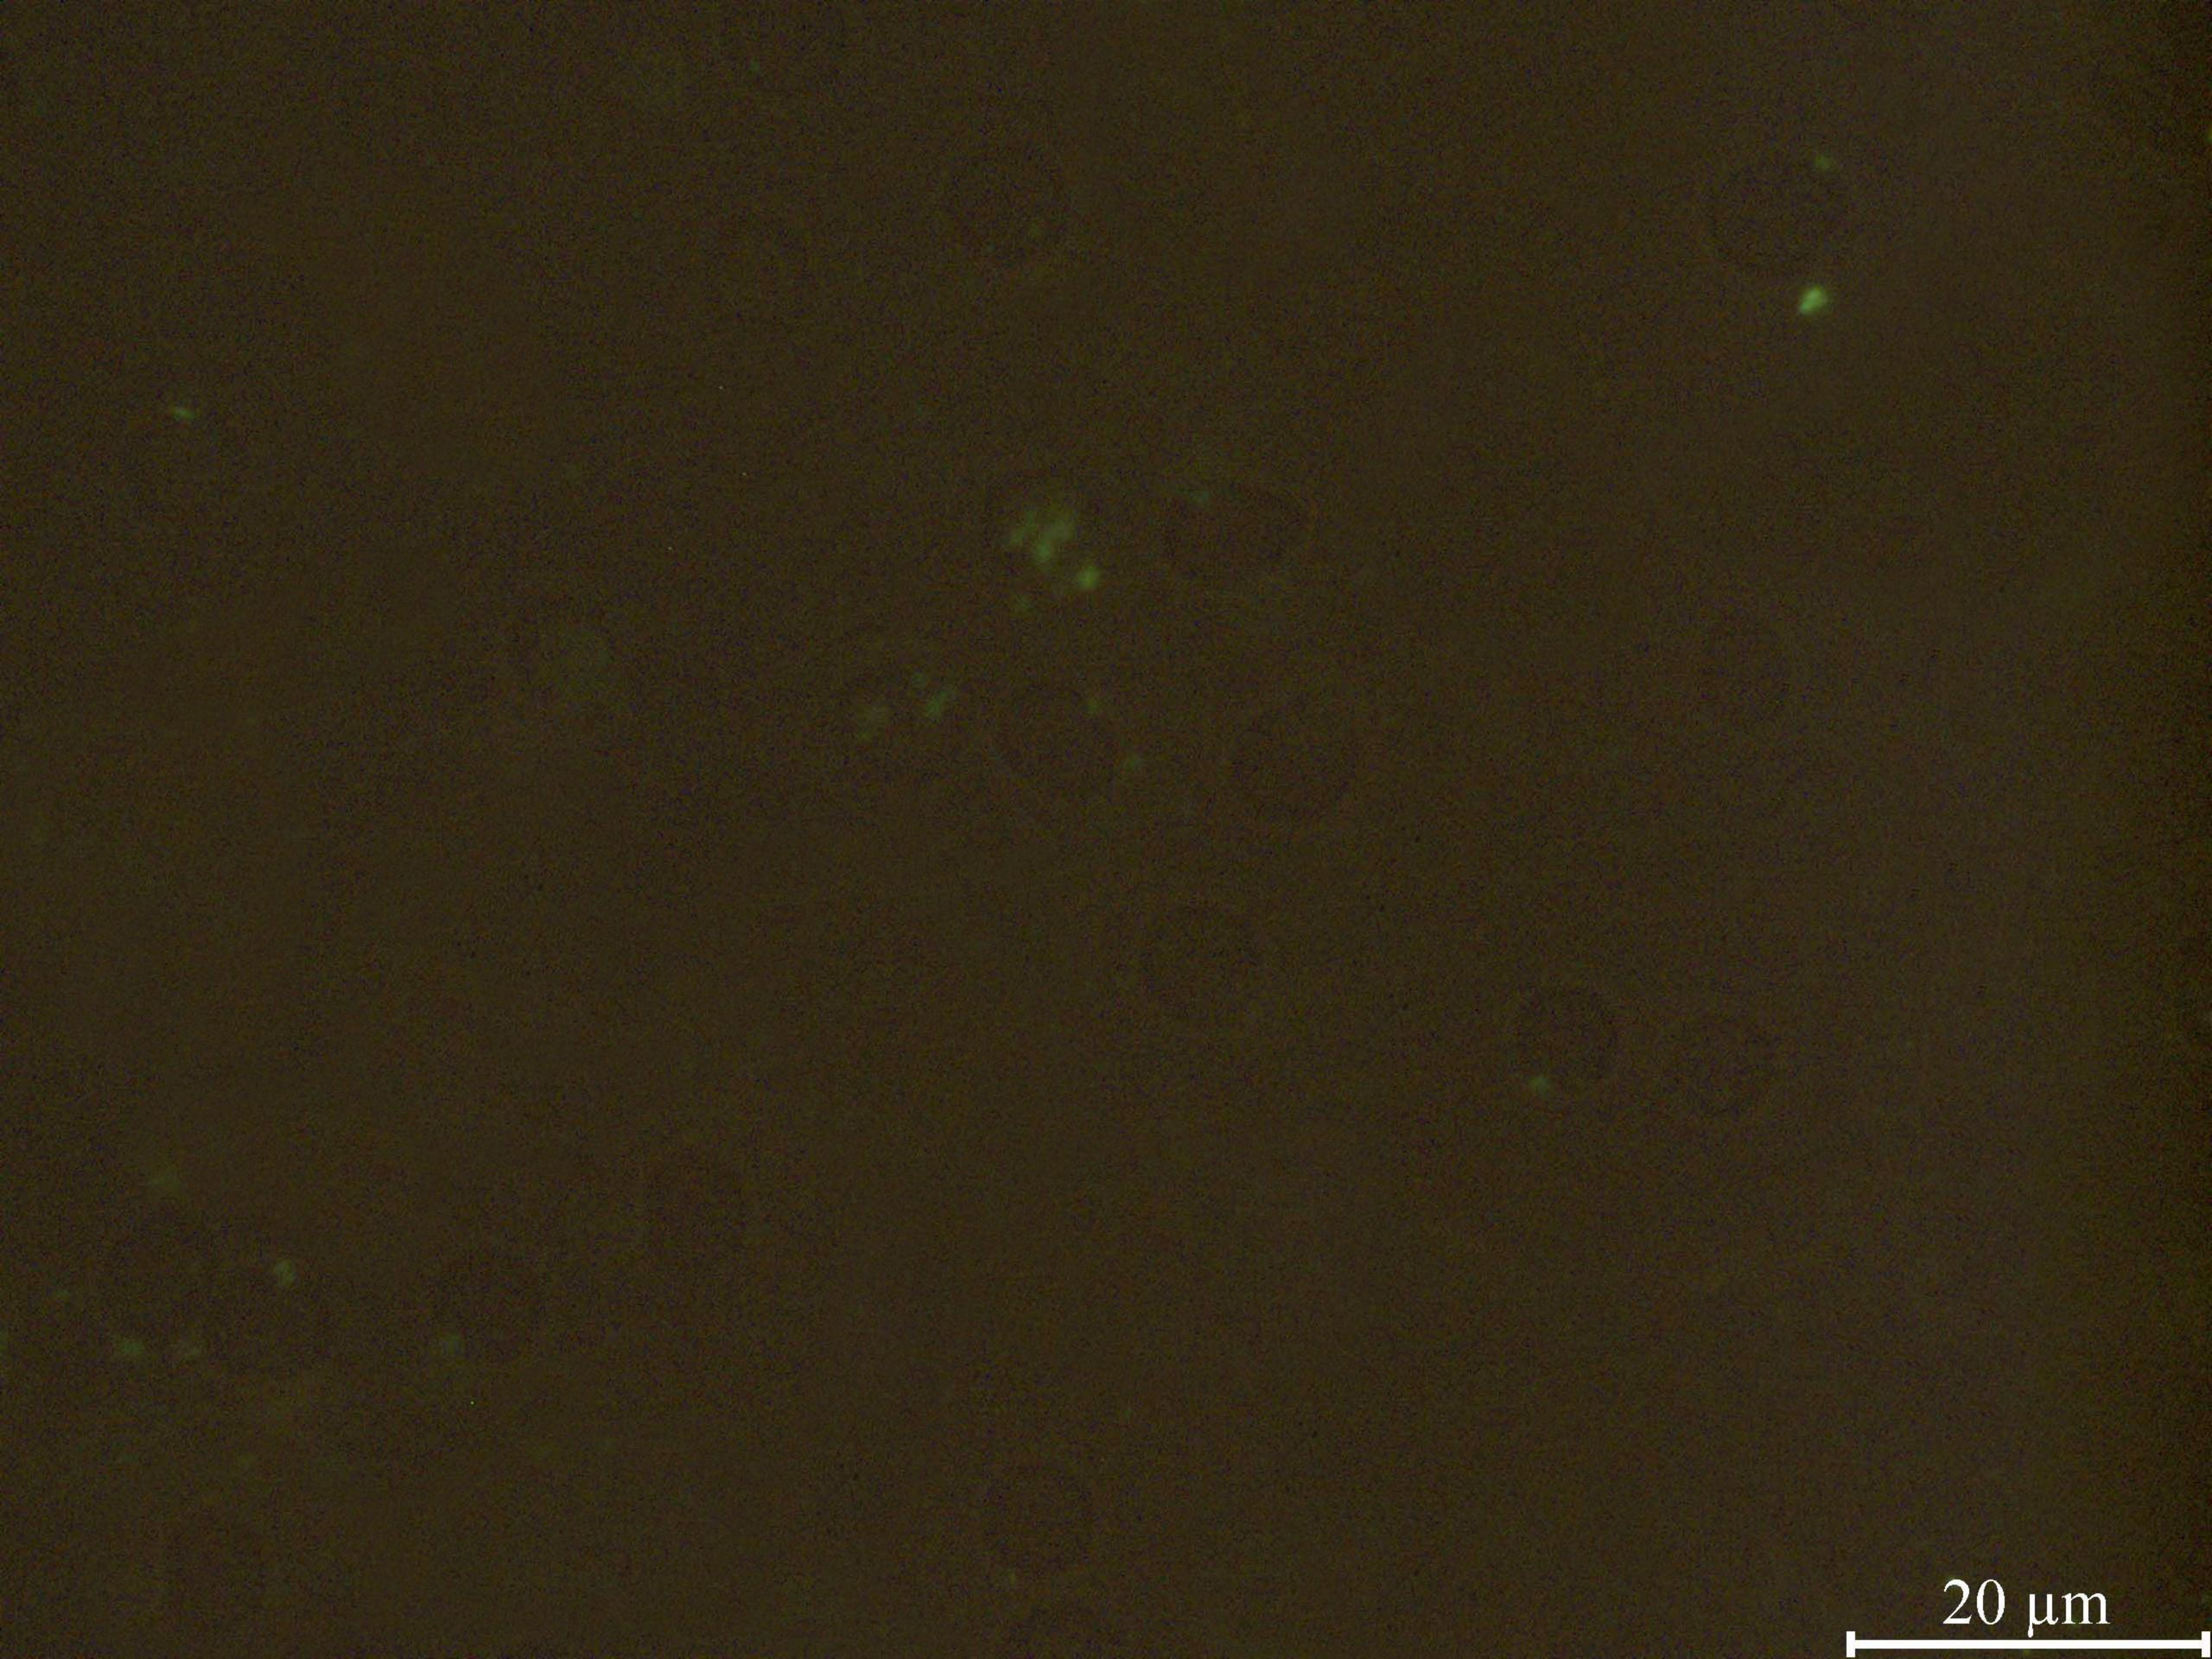

Supplement: Picture_supplement.zip [file Picture_supplement.zip]

**Mean fluorescence intensity  
of porcine erythrocytes ( MIF)**

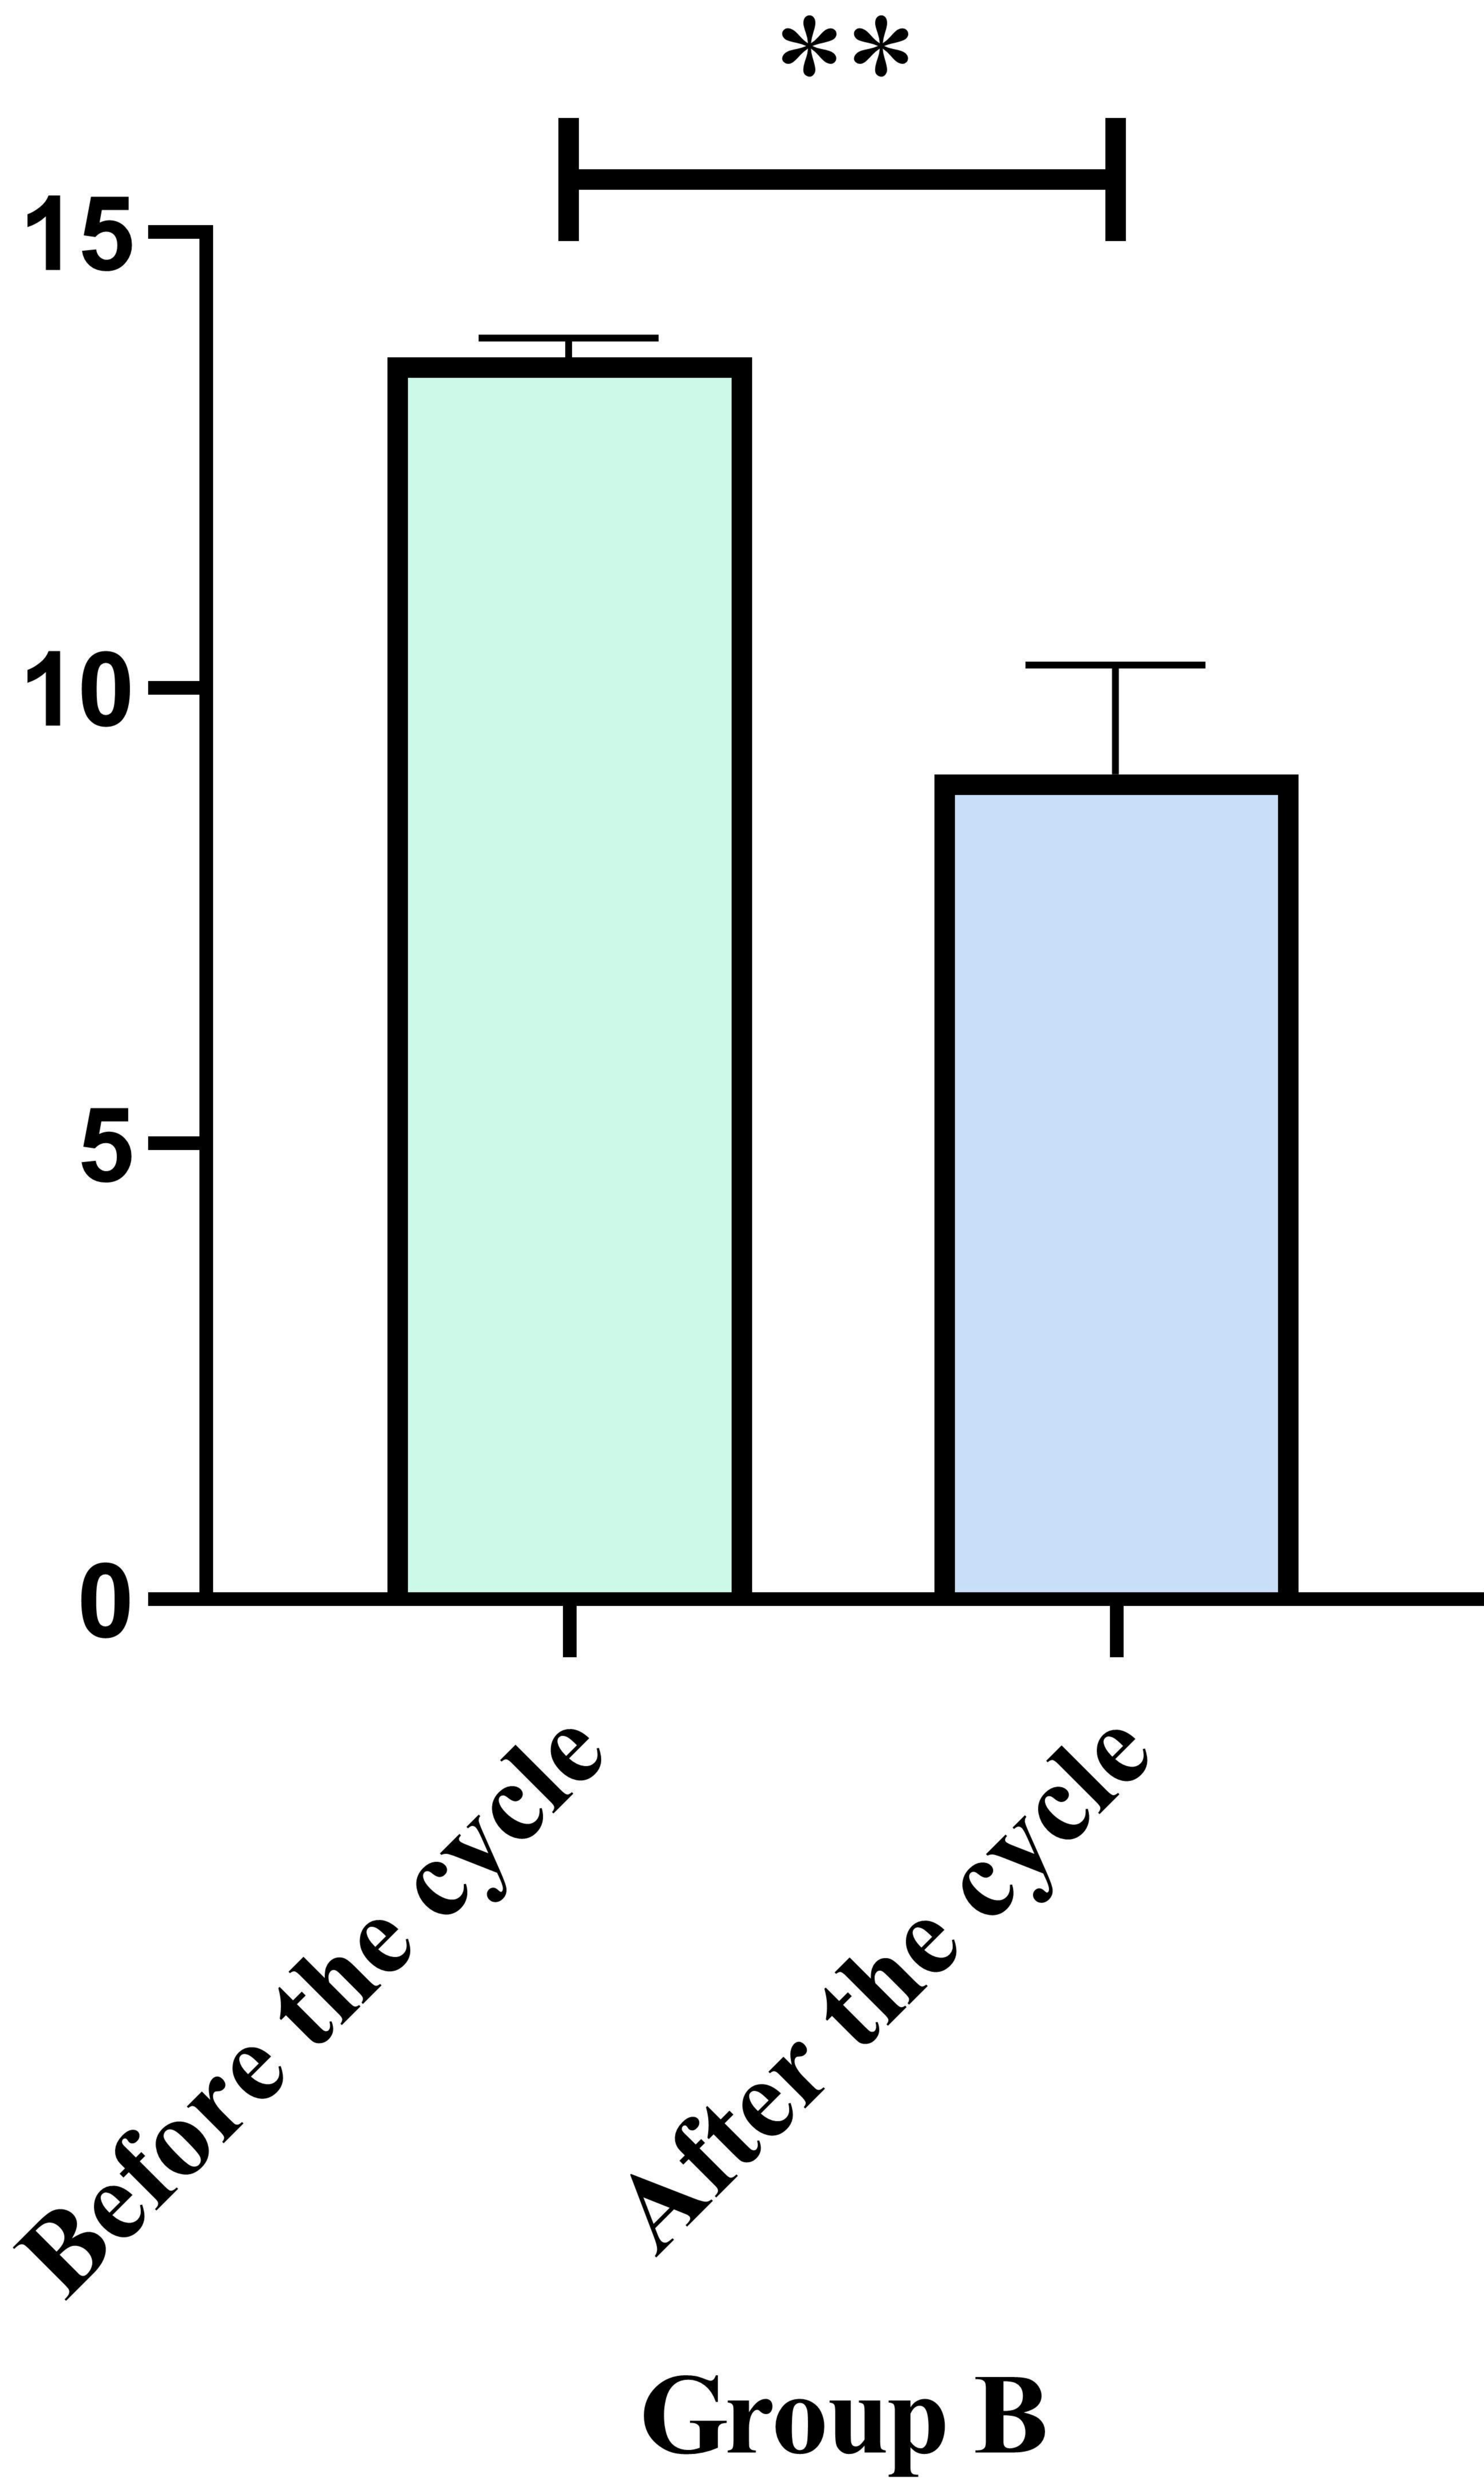

Supplement: Picture_supplement.zip [file Picture_supplement.zip]

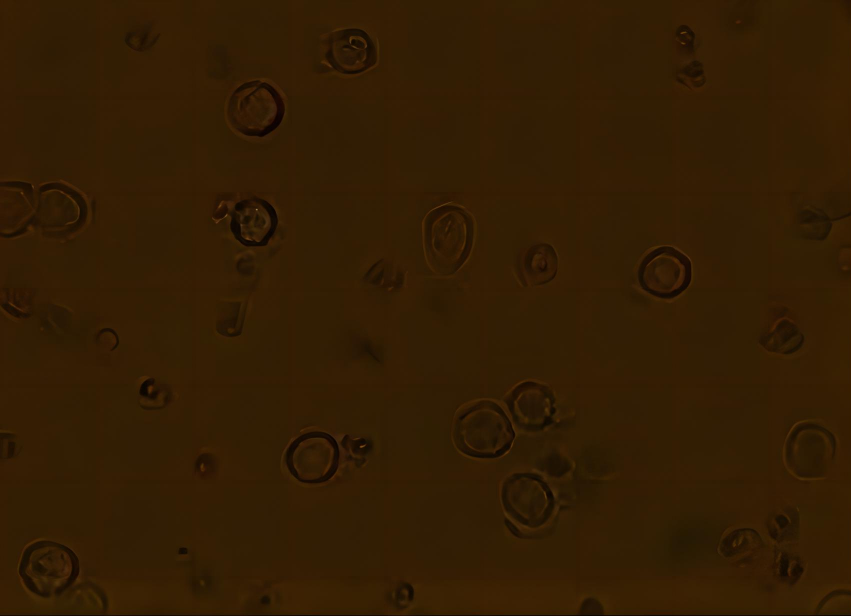

Supplement: Picture_supplement.zip [file Picture_supplement.zip]

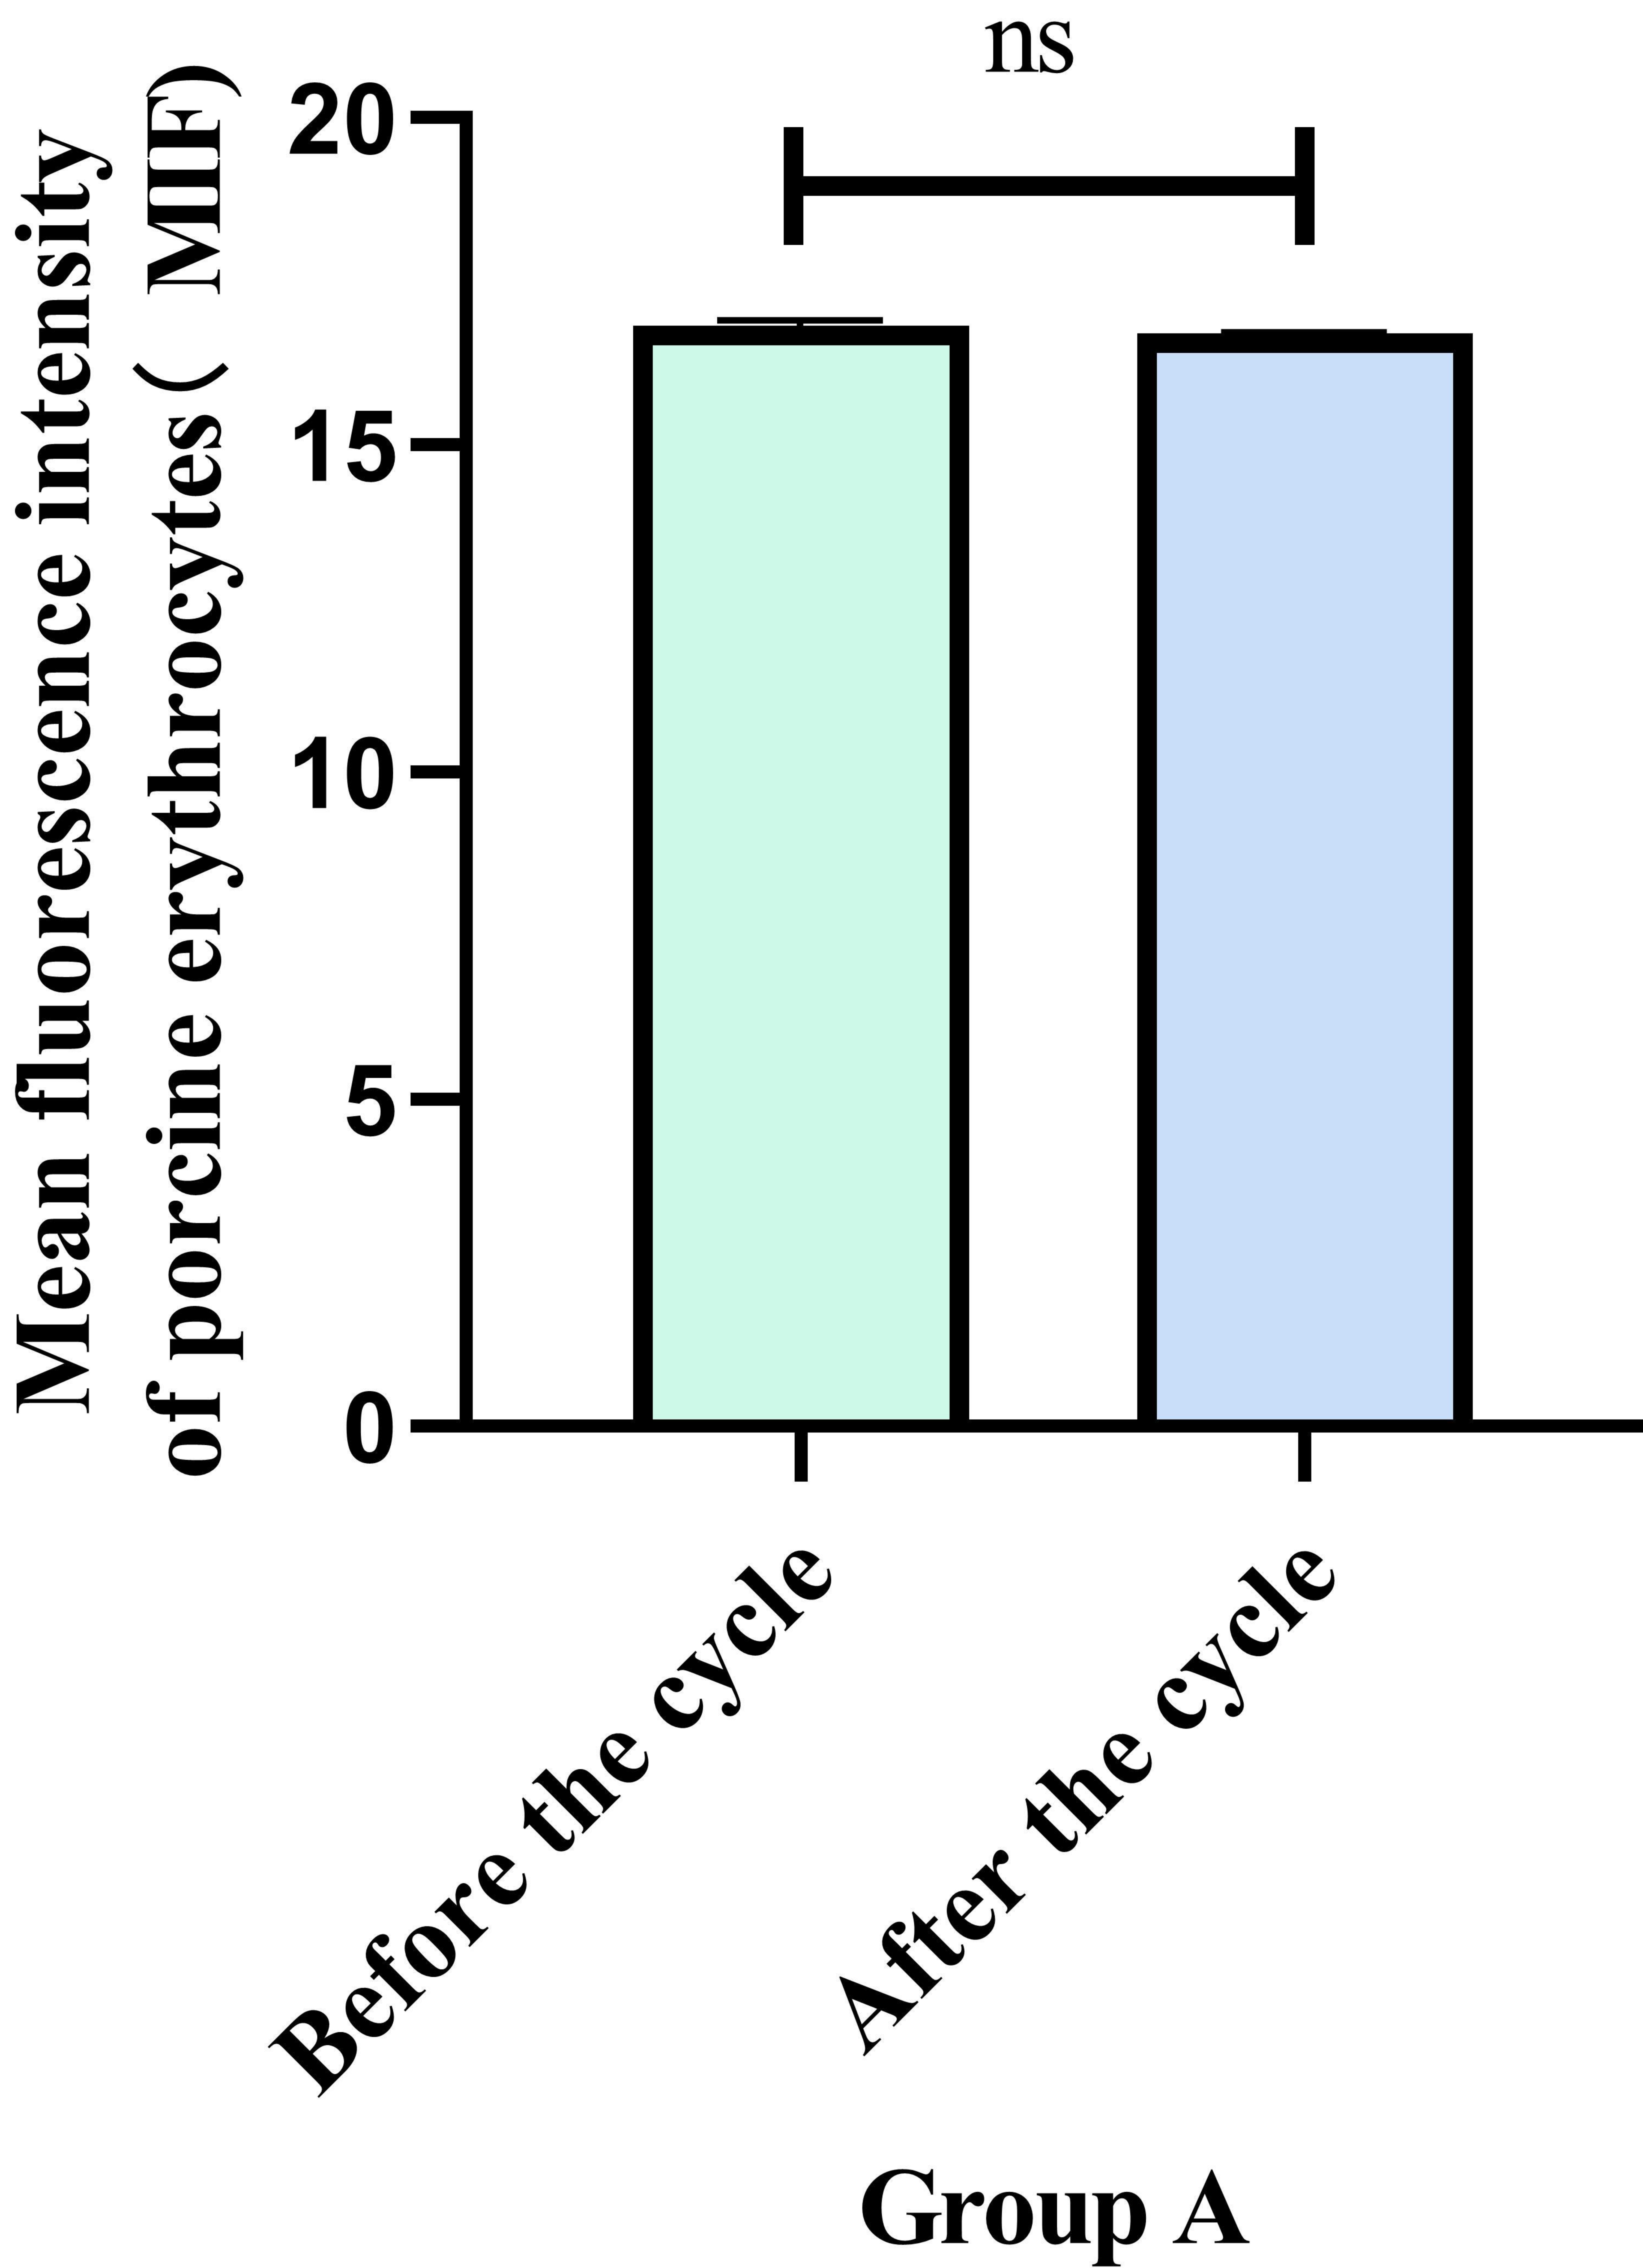

Supplement: Picture_supplement.zip [file Picture_supplement.zip]

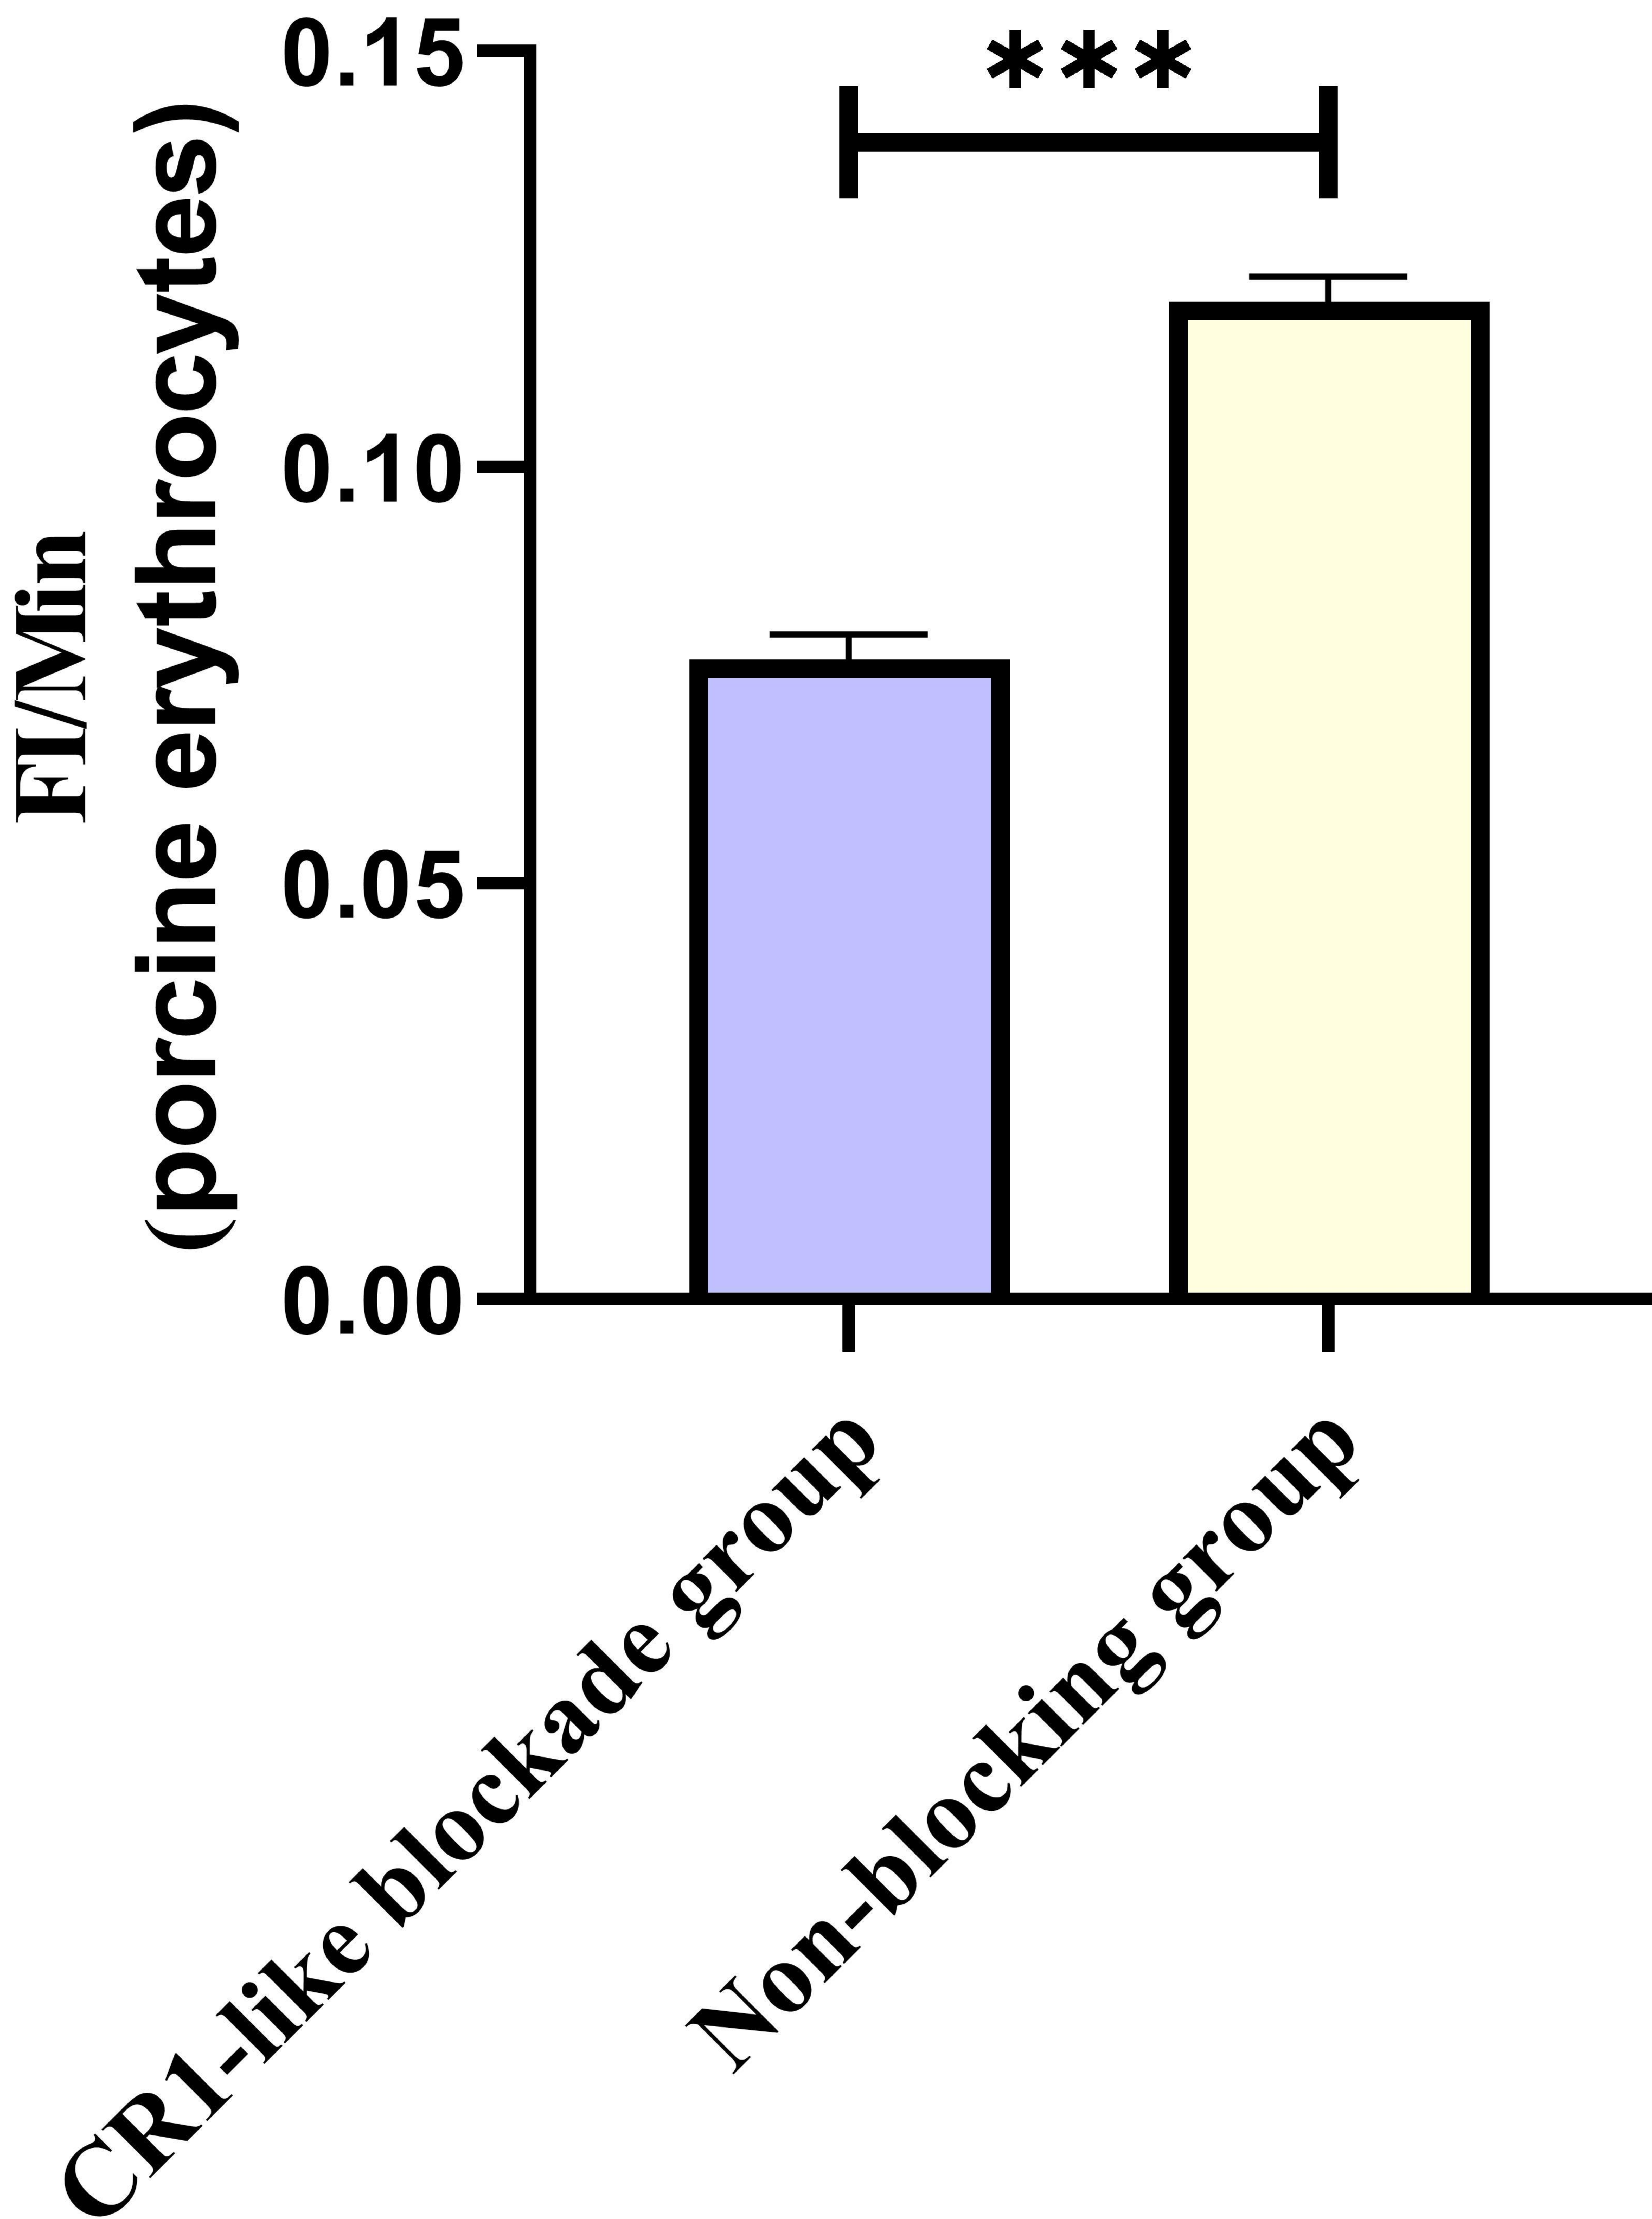

Supplement: Picture_supplement.zip [file Picture_supplement.zip]

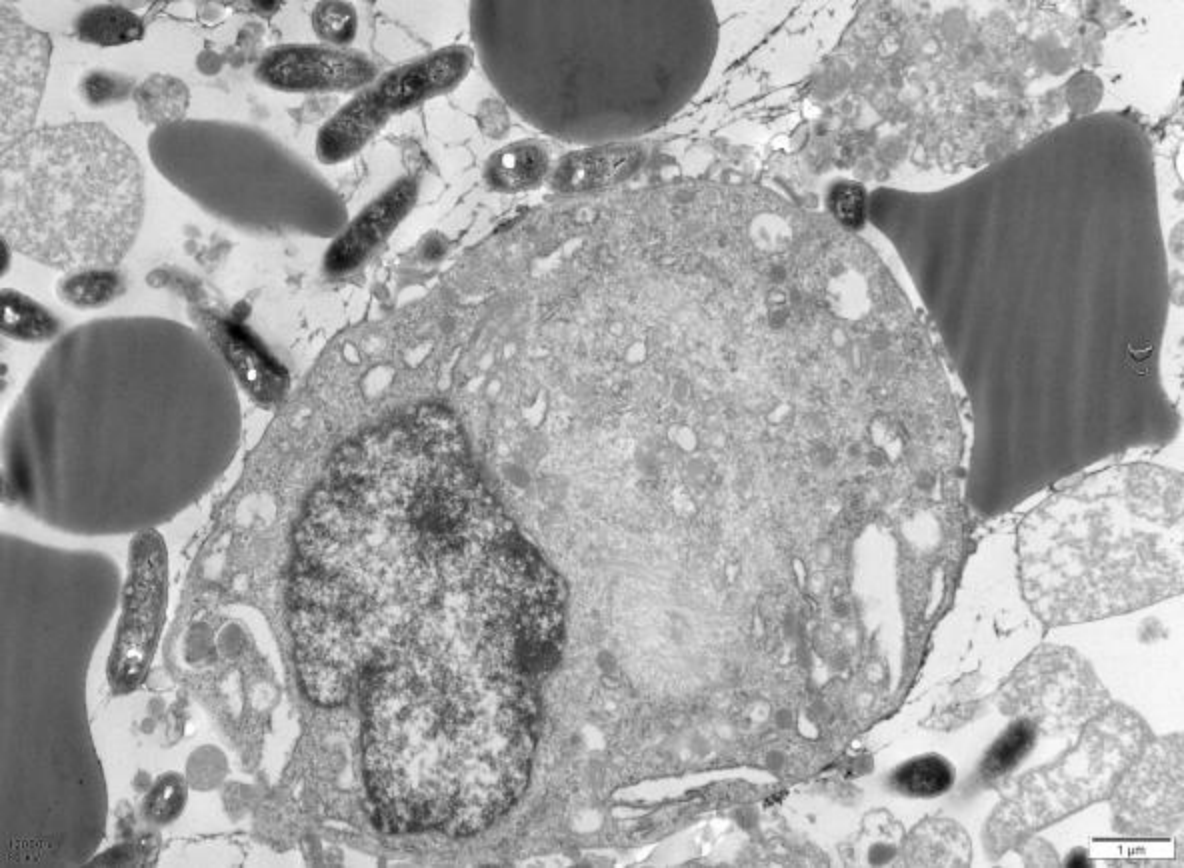

Supplement: Picture_supplement.zip [file Picture_supplement.zip]

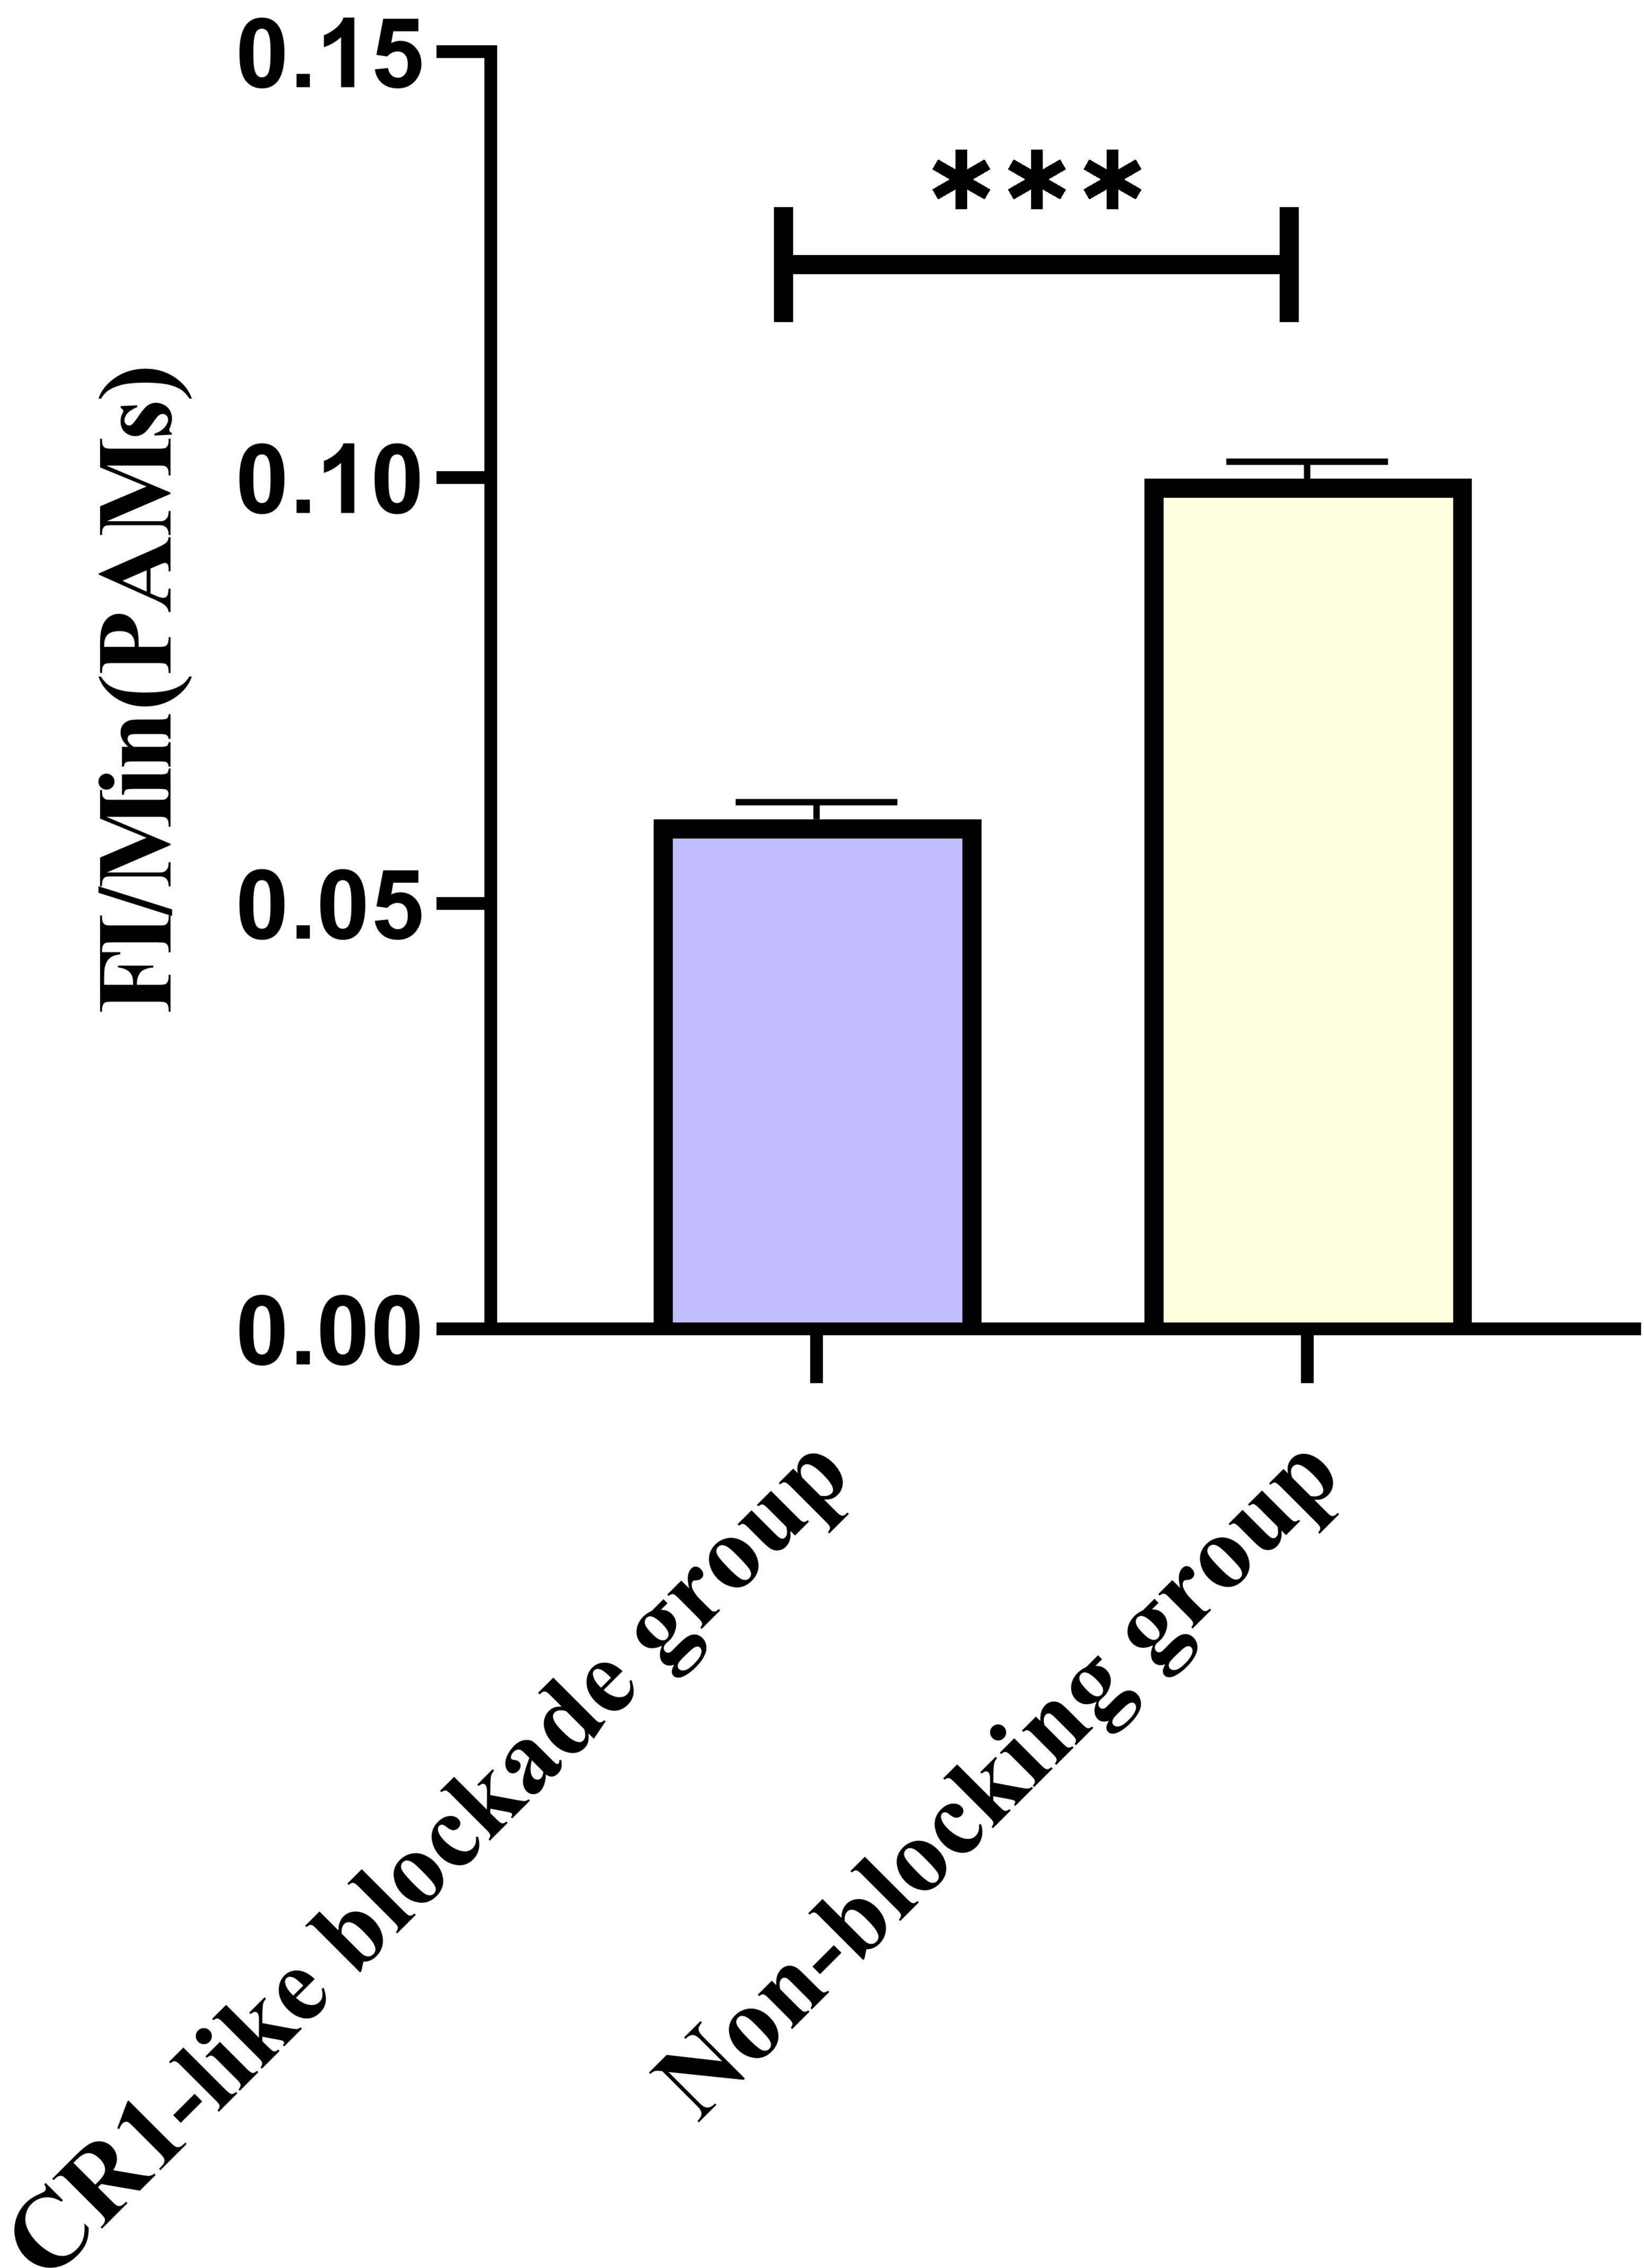

Supplement: Picture_supplement.zip [file Picture_supplement.zip]

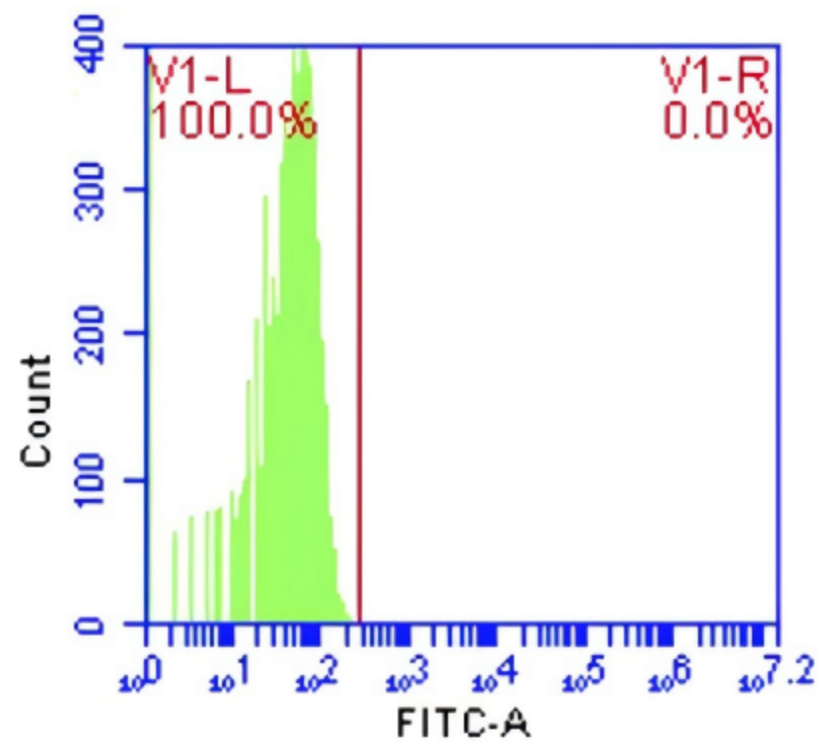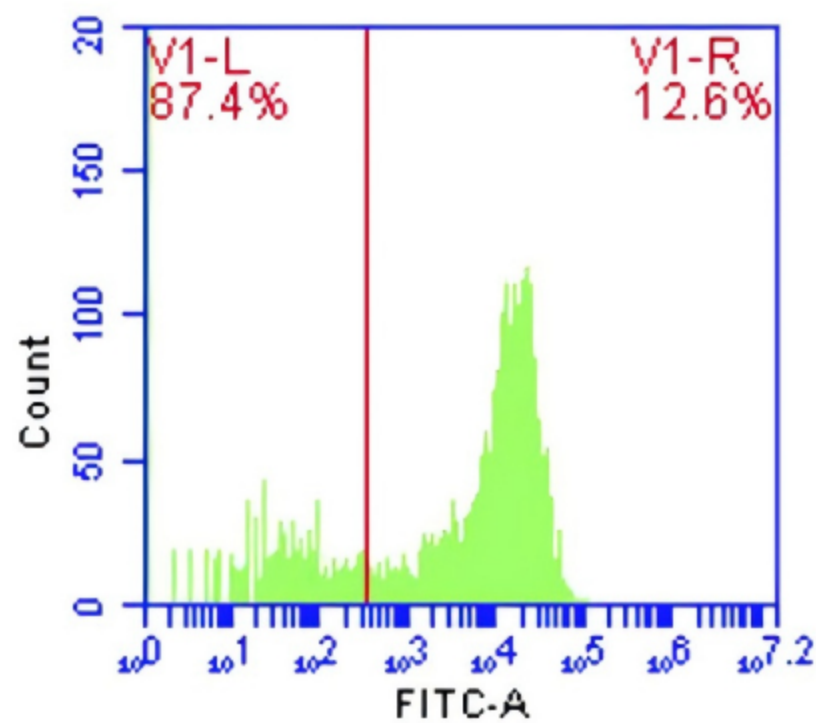

Supplement: Picture_supplement.zip [file Picture_supplement.zip]



Supplement: Picture_supplement.zip [file Picture_supplement.zip]

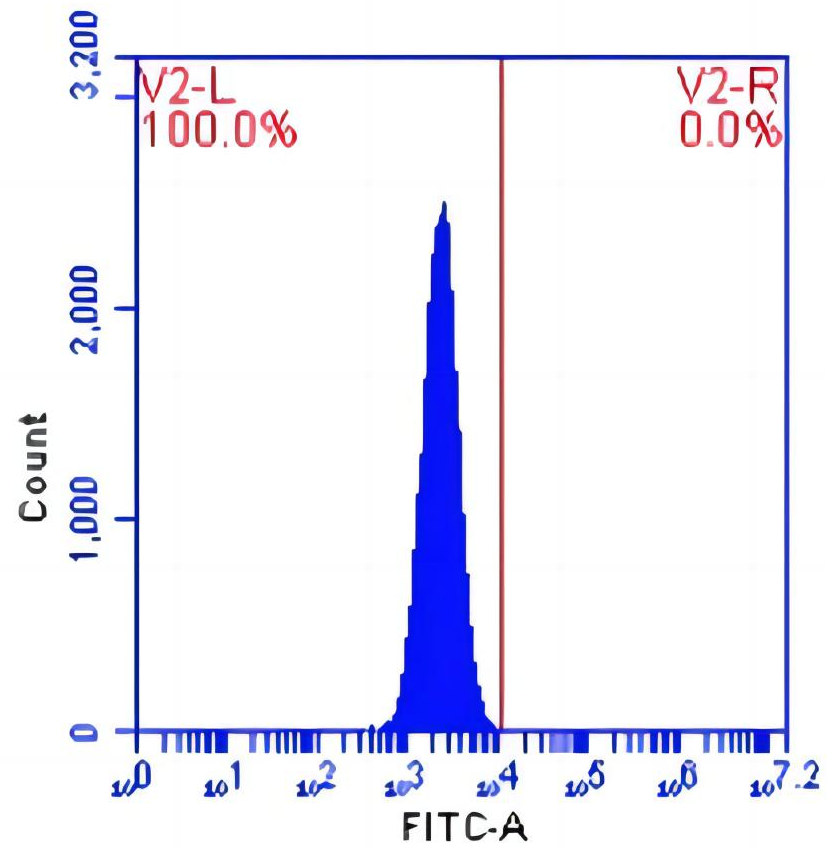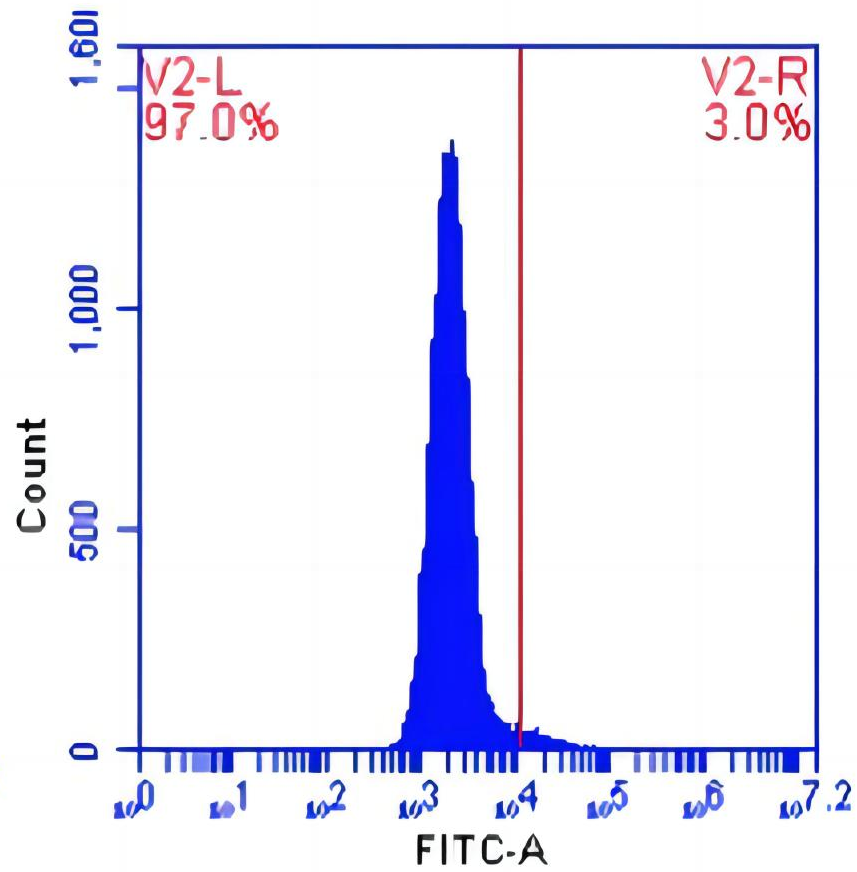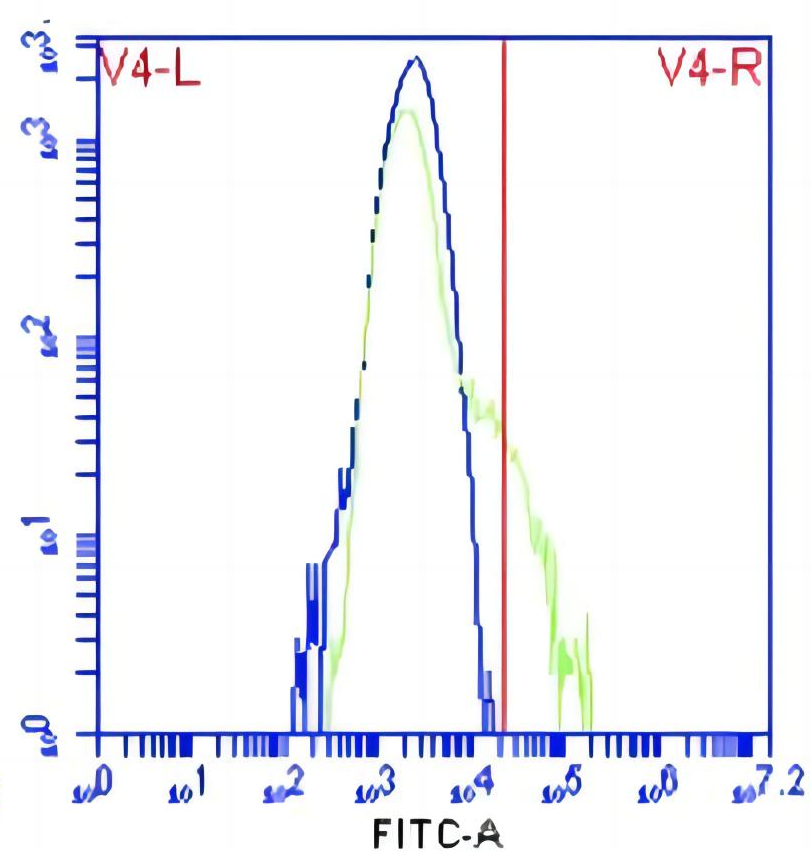

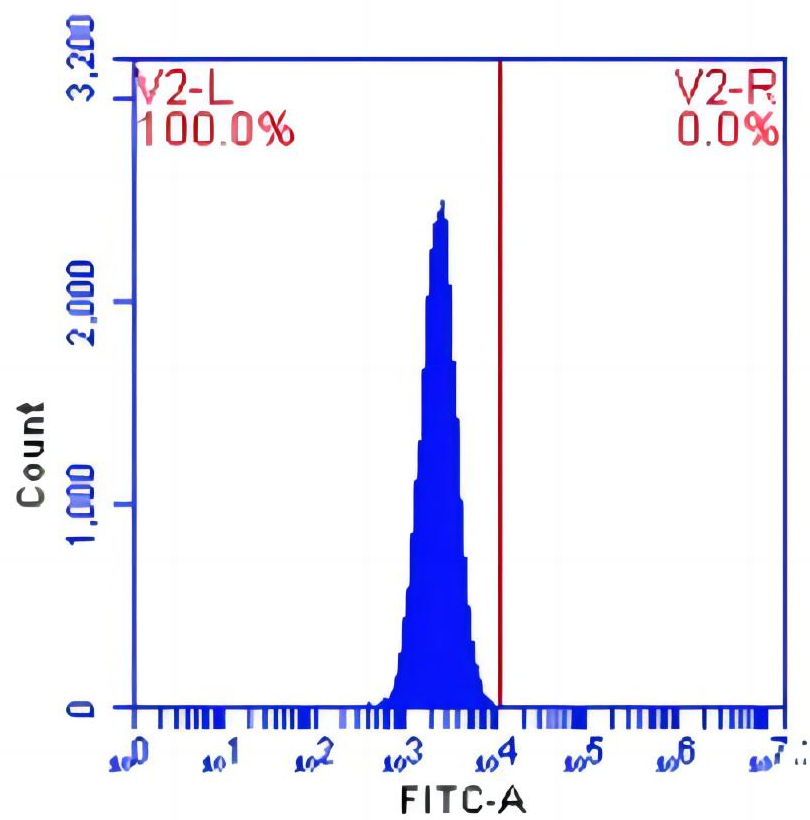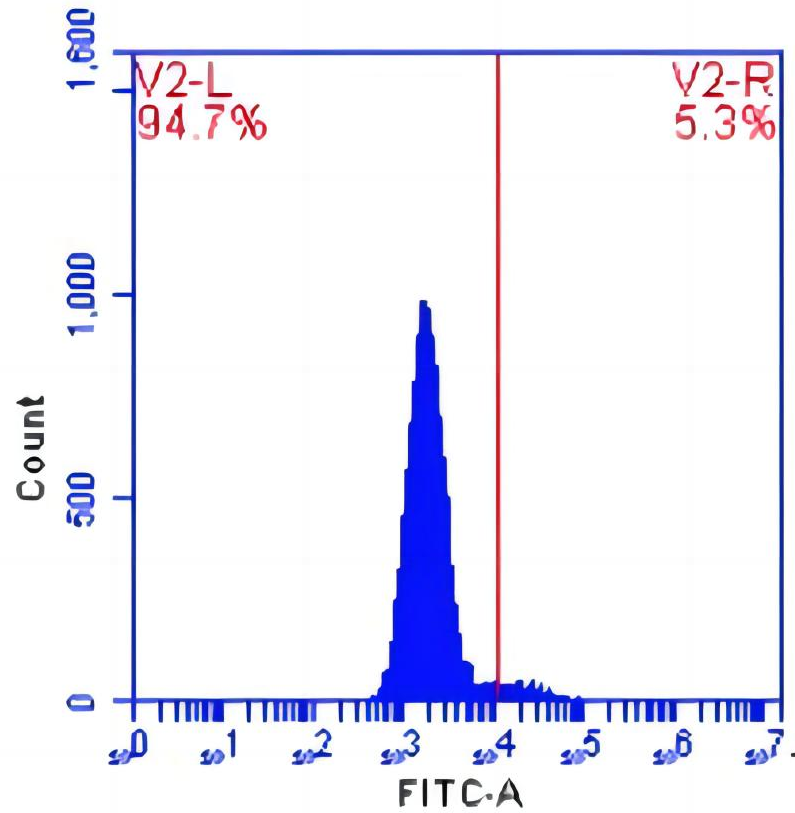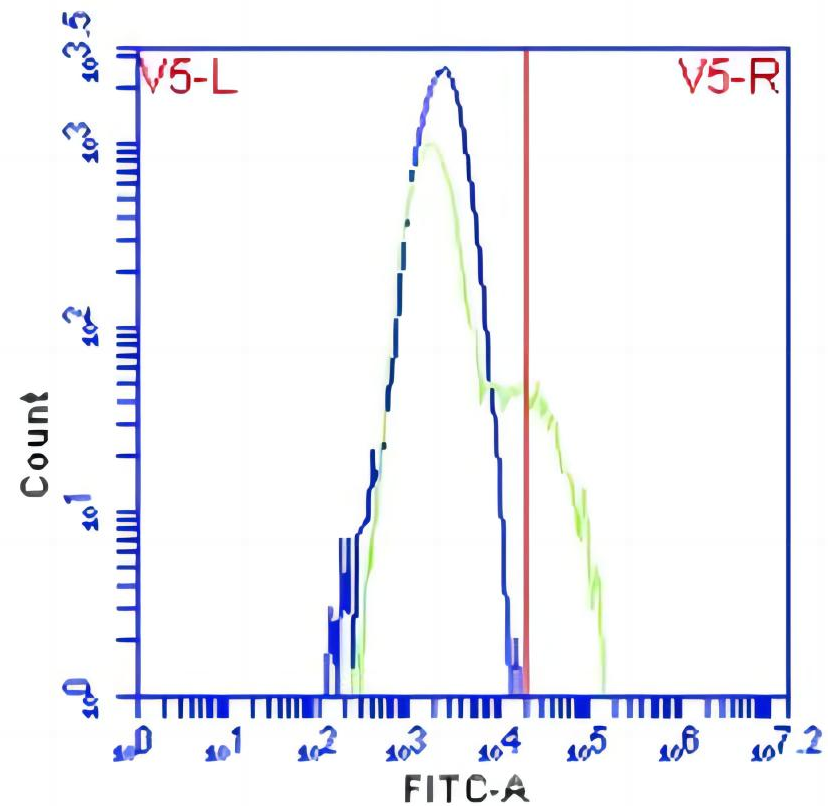

Supplement: Picture_supplement.zip [file Picture_supplement.zip]



Supplement: Picture_supplement.zip [file Picture_supplement.zip]

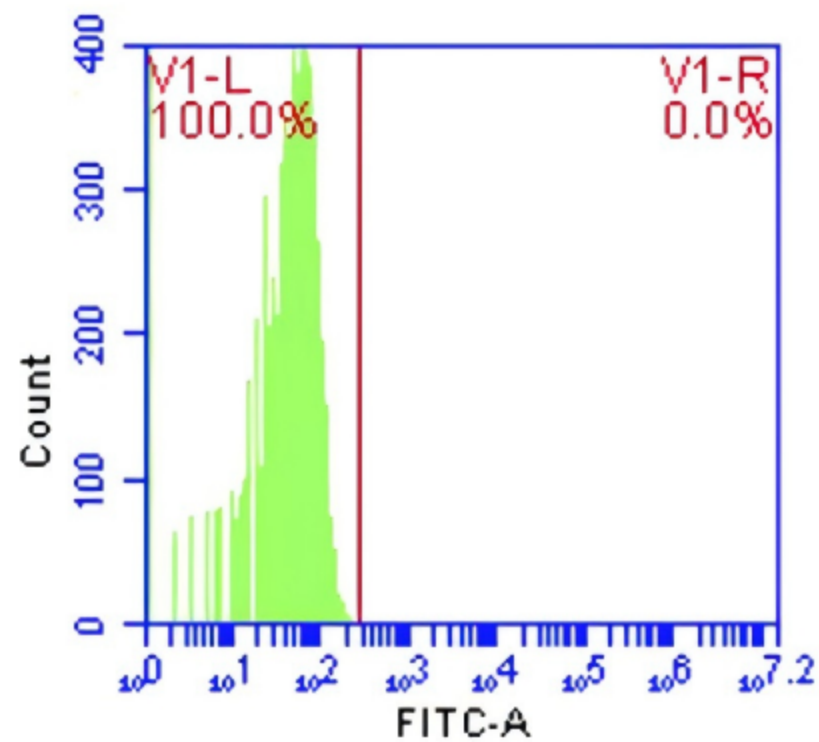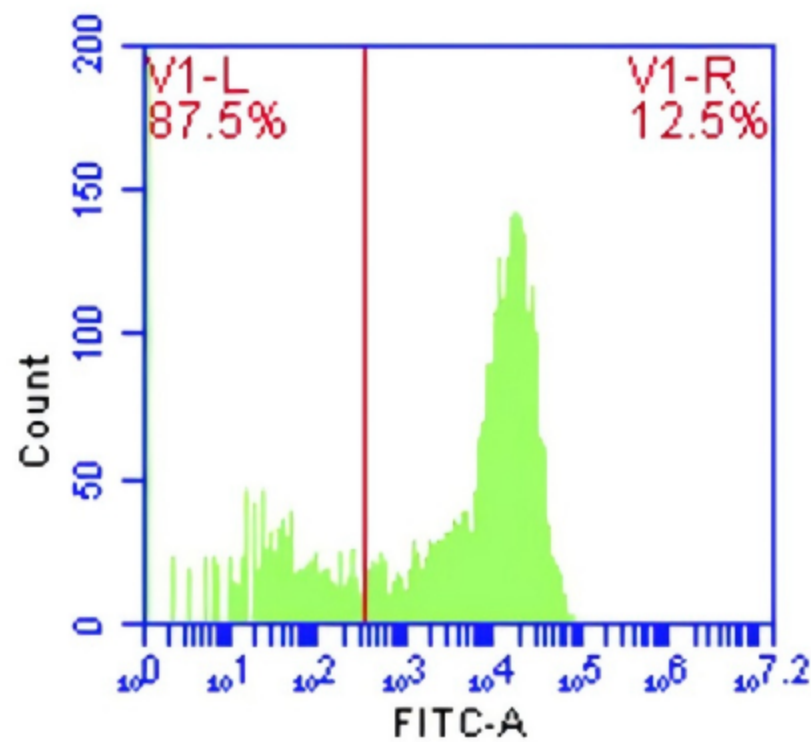

Supplement: Picture_supplement.zip [file Picture_supplement.zip]

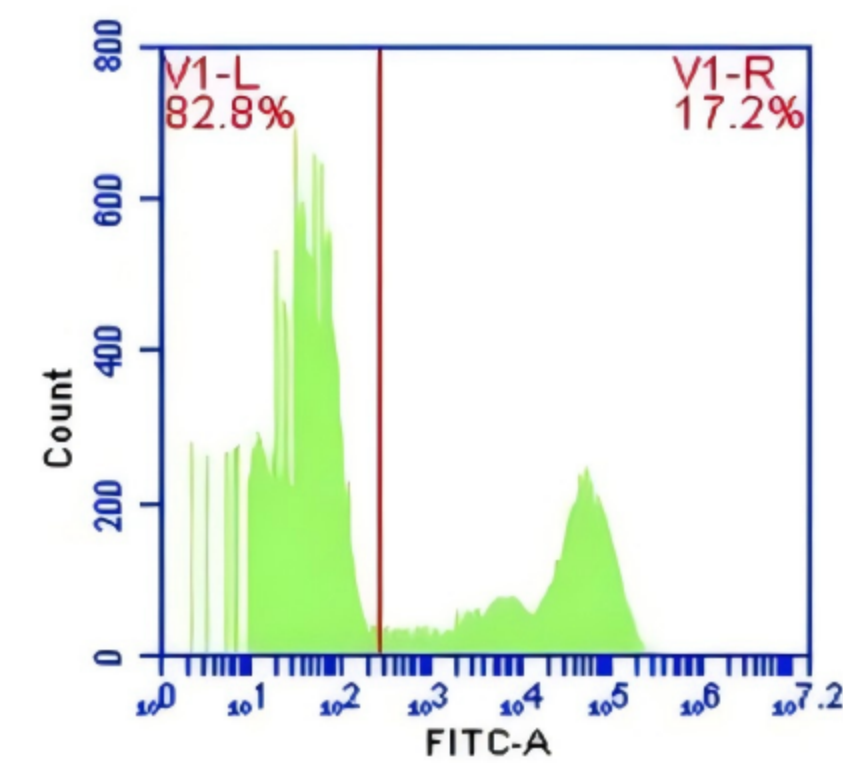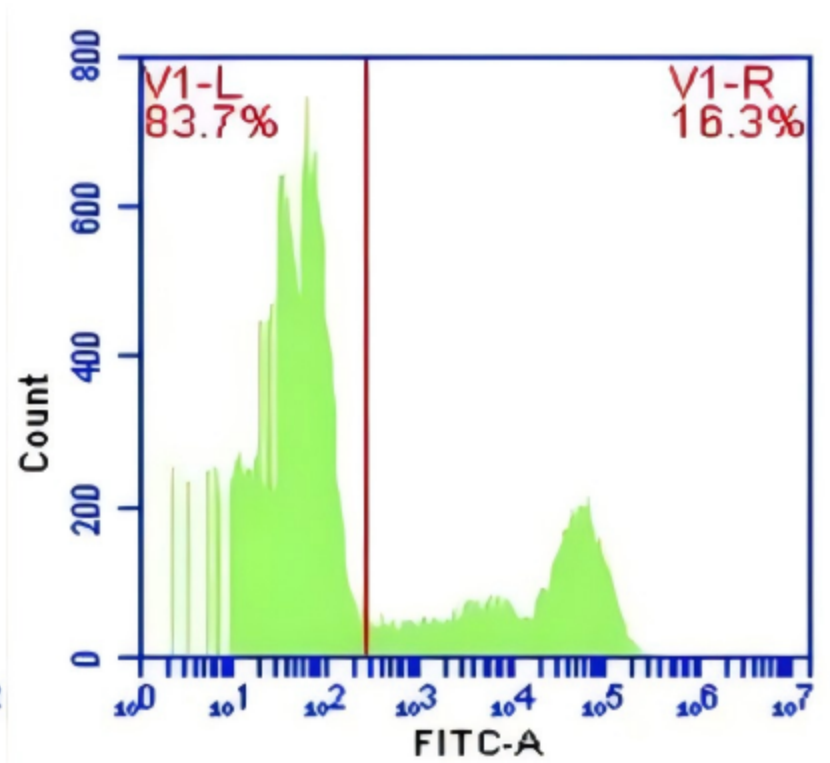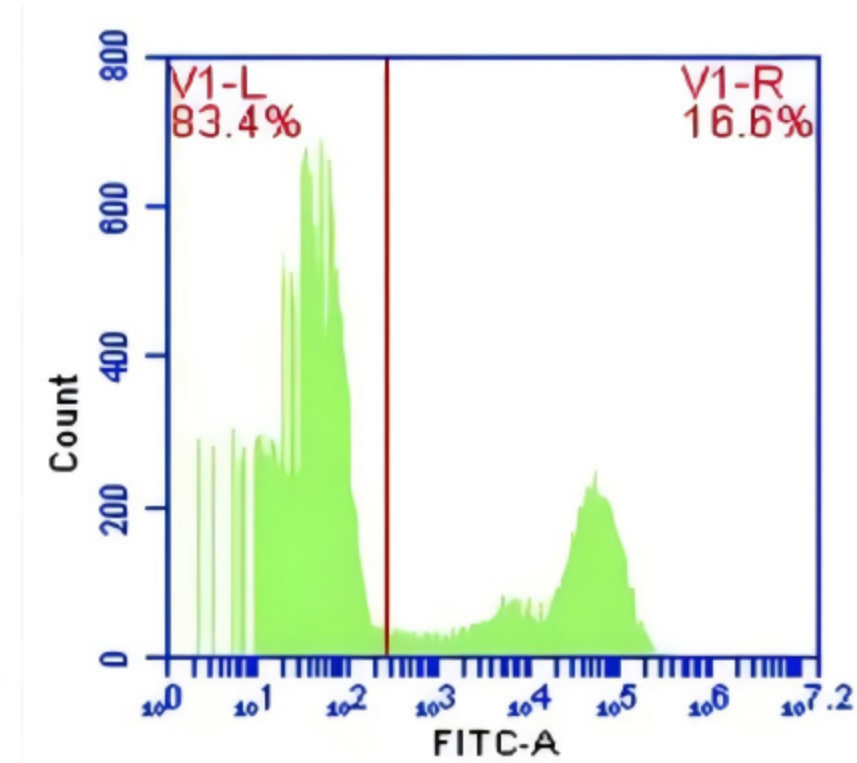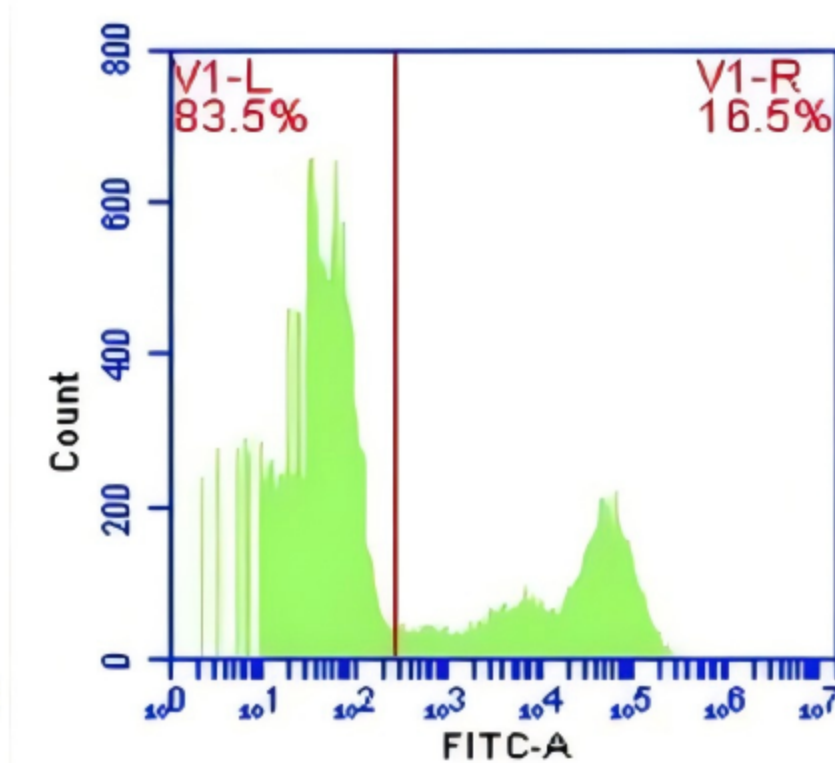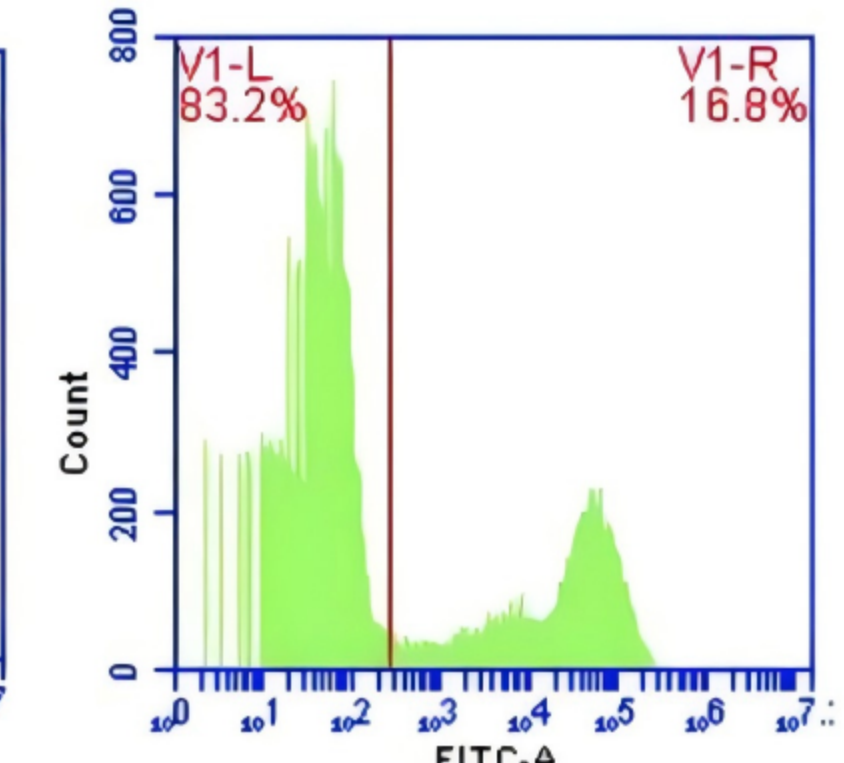

Supplement: Picture_supplement.zip [file Picture_supplement.zip]

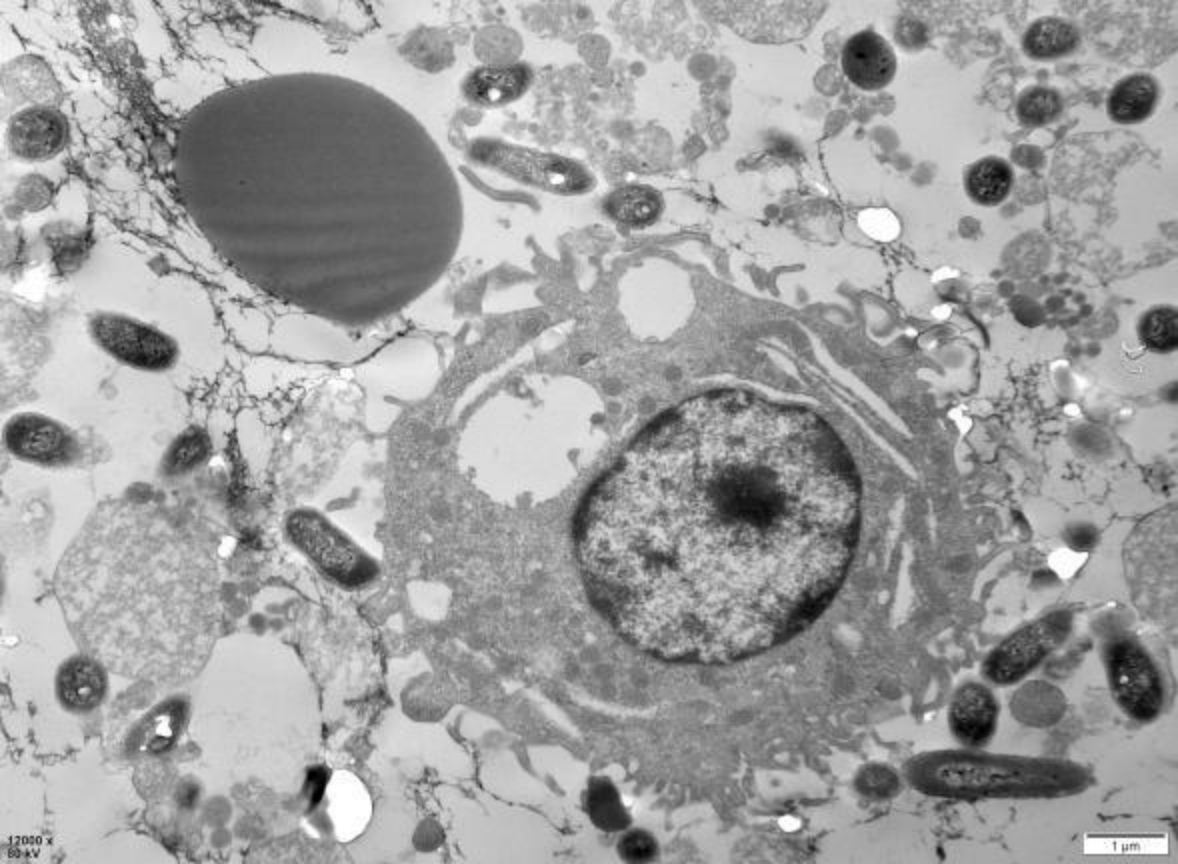

Supplement: Picture_supplement.zip [file Picture_supplement.zip]

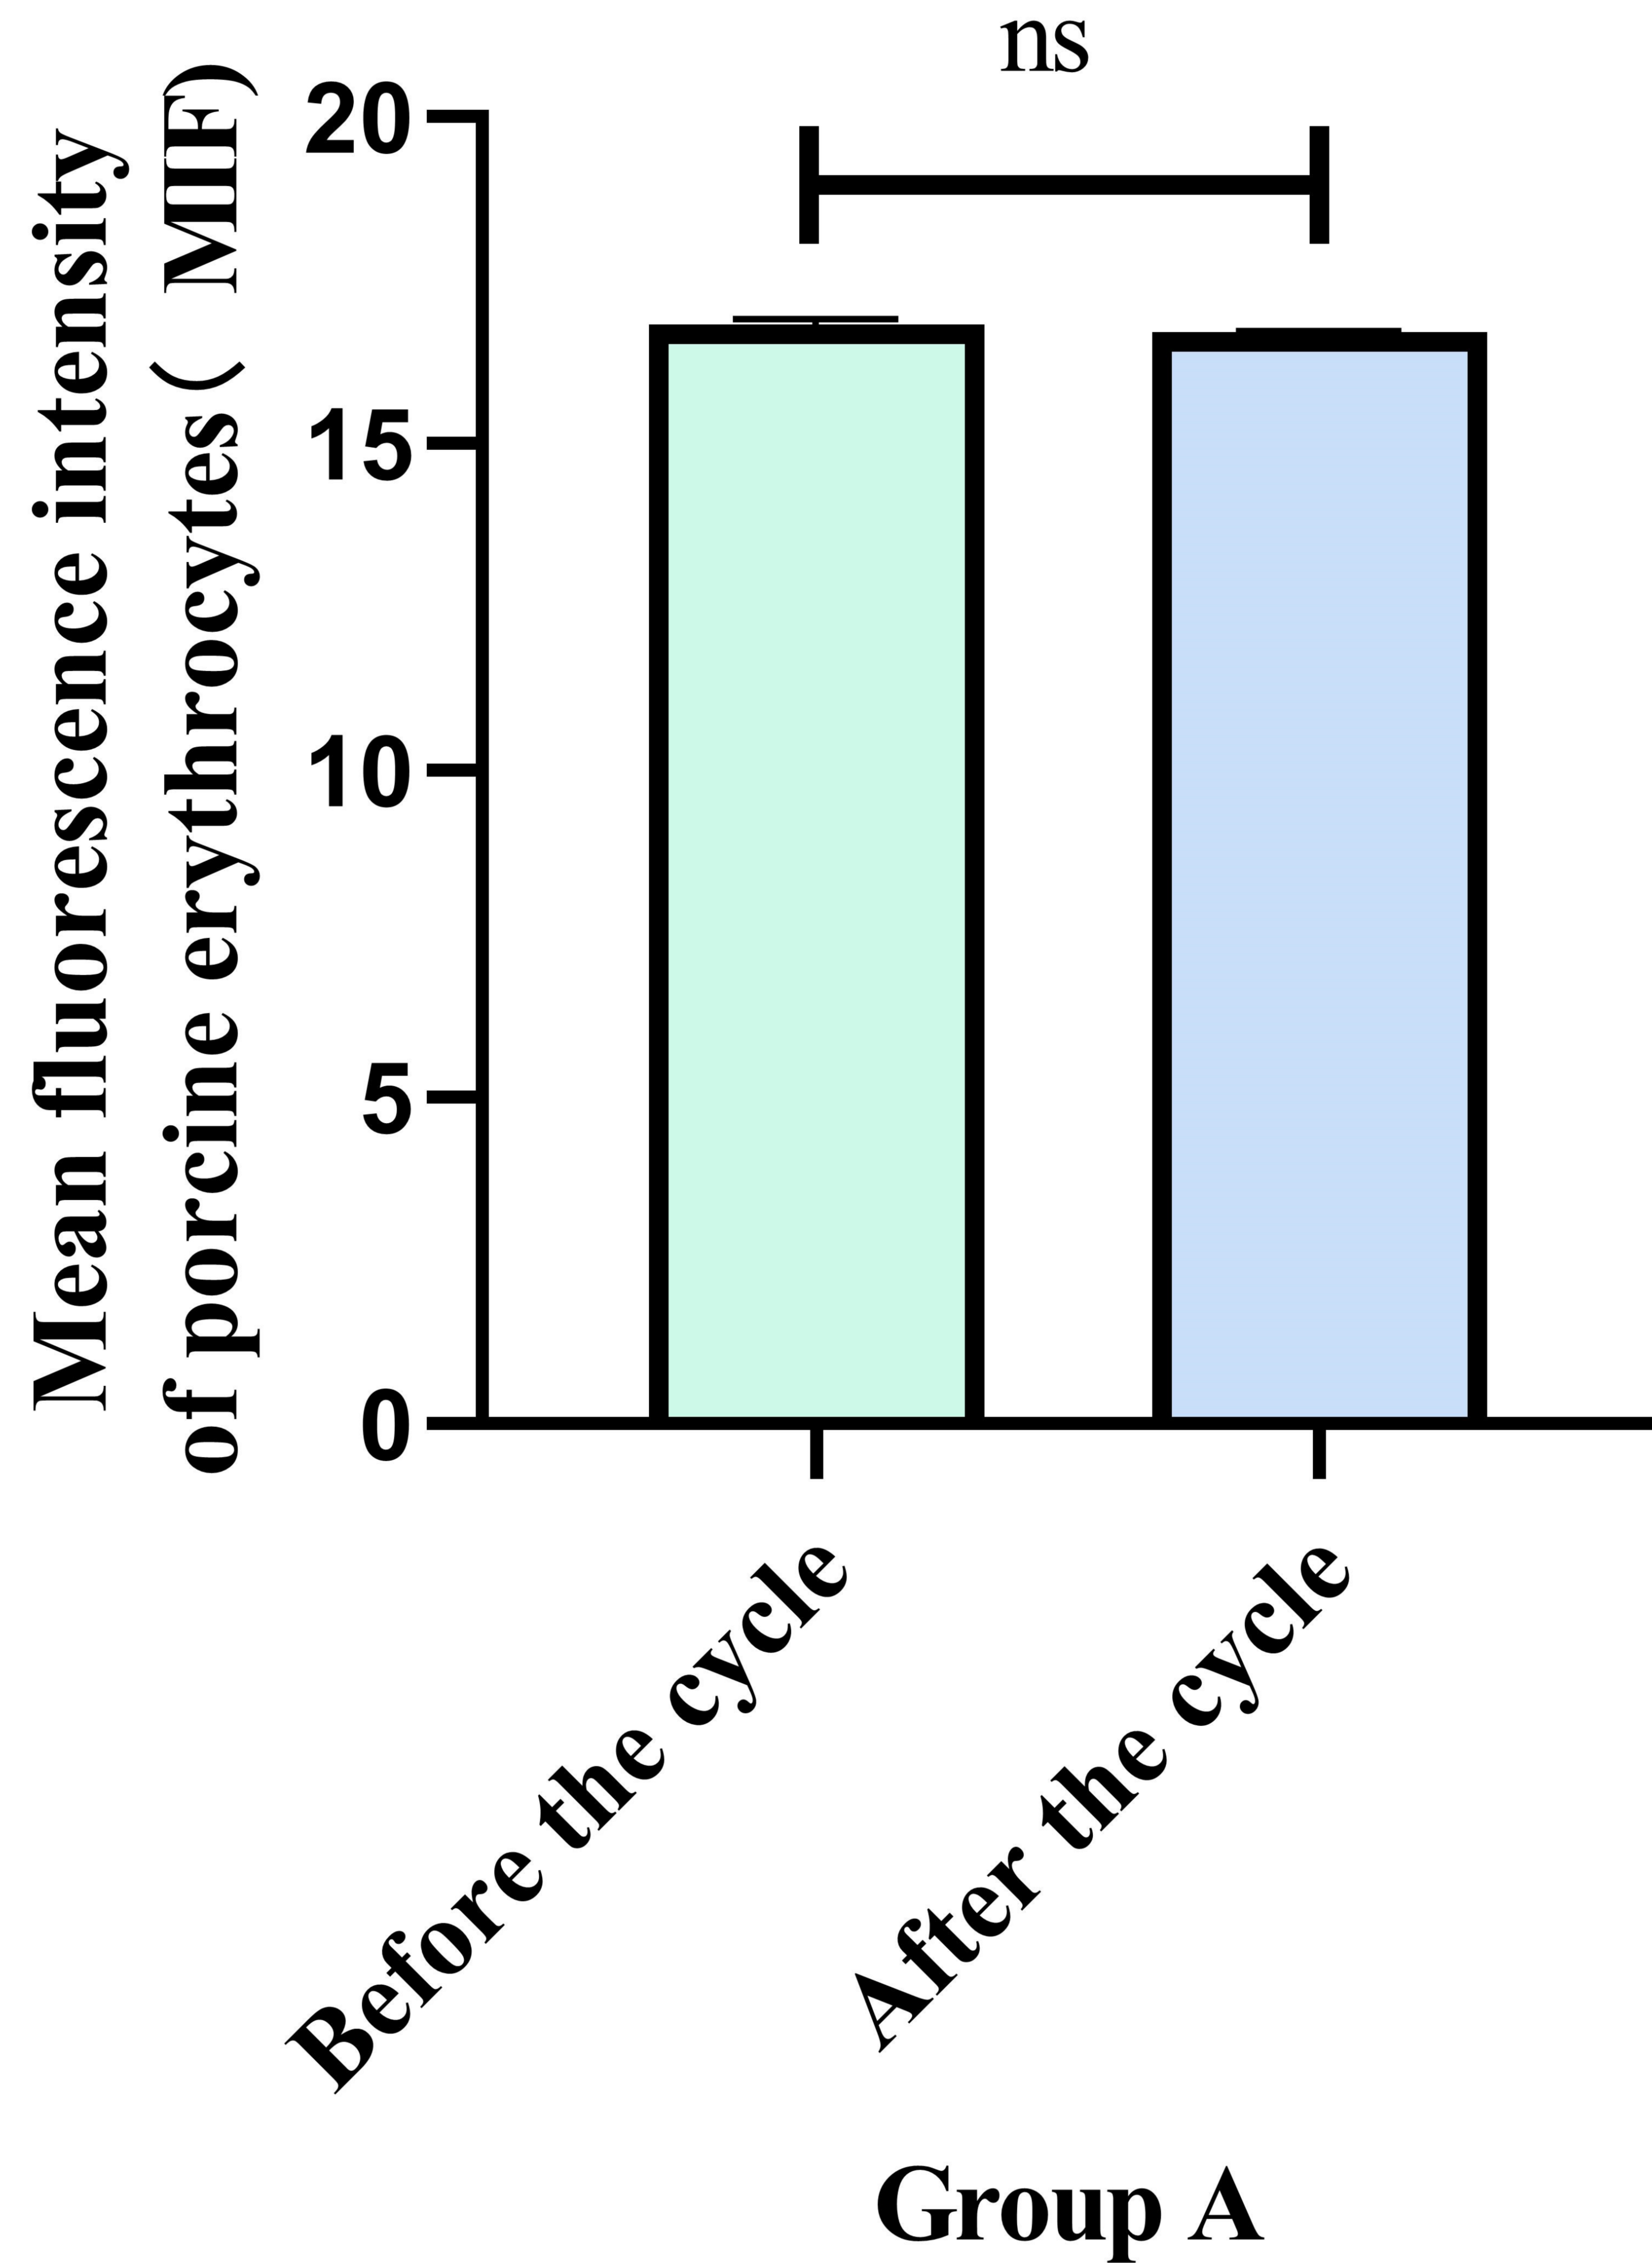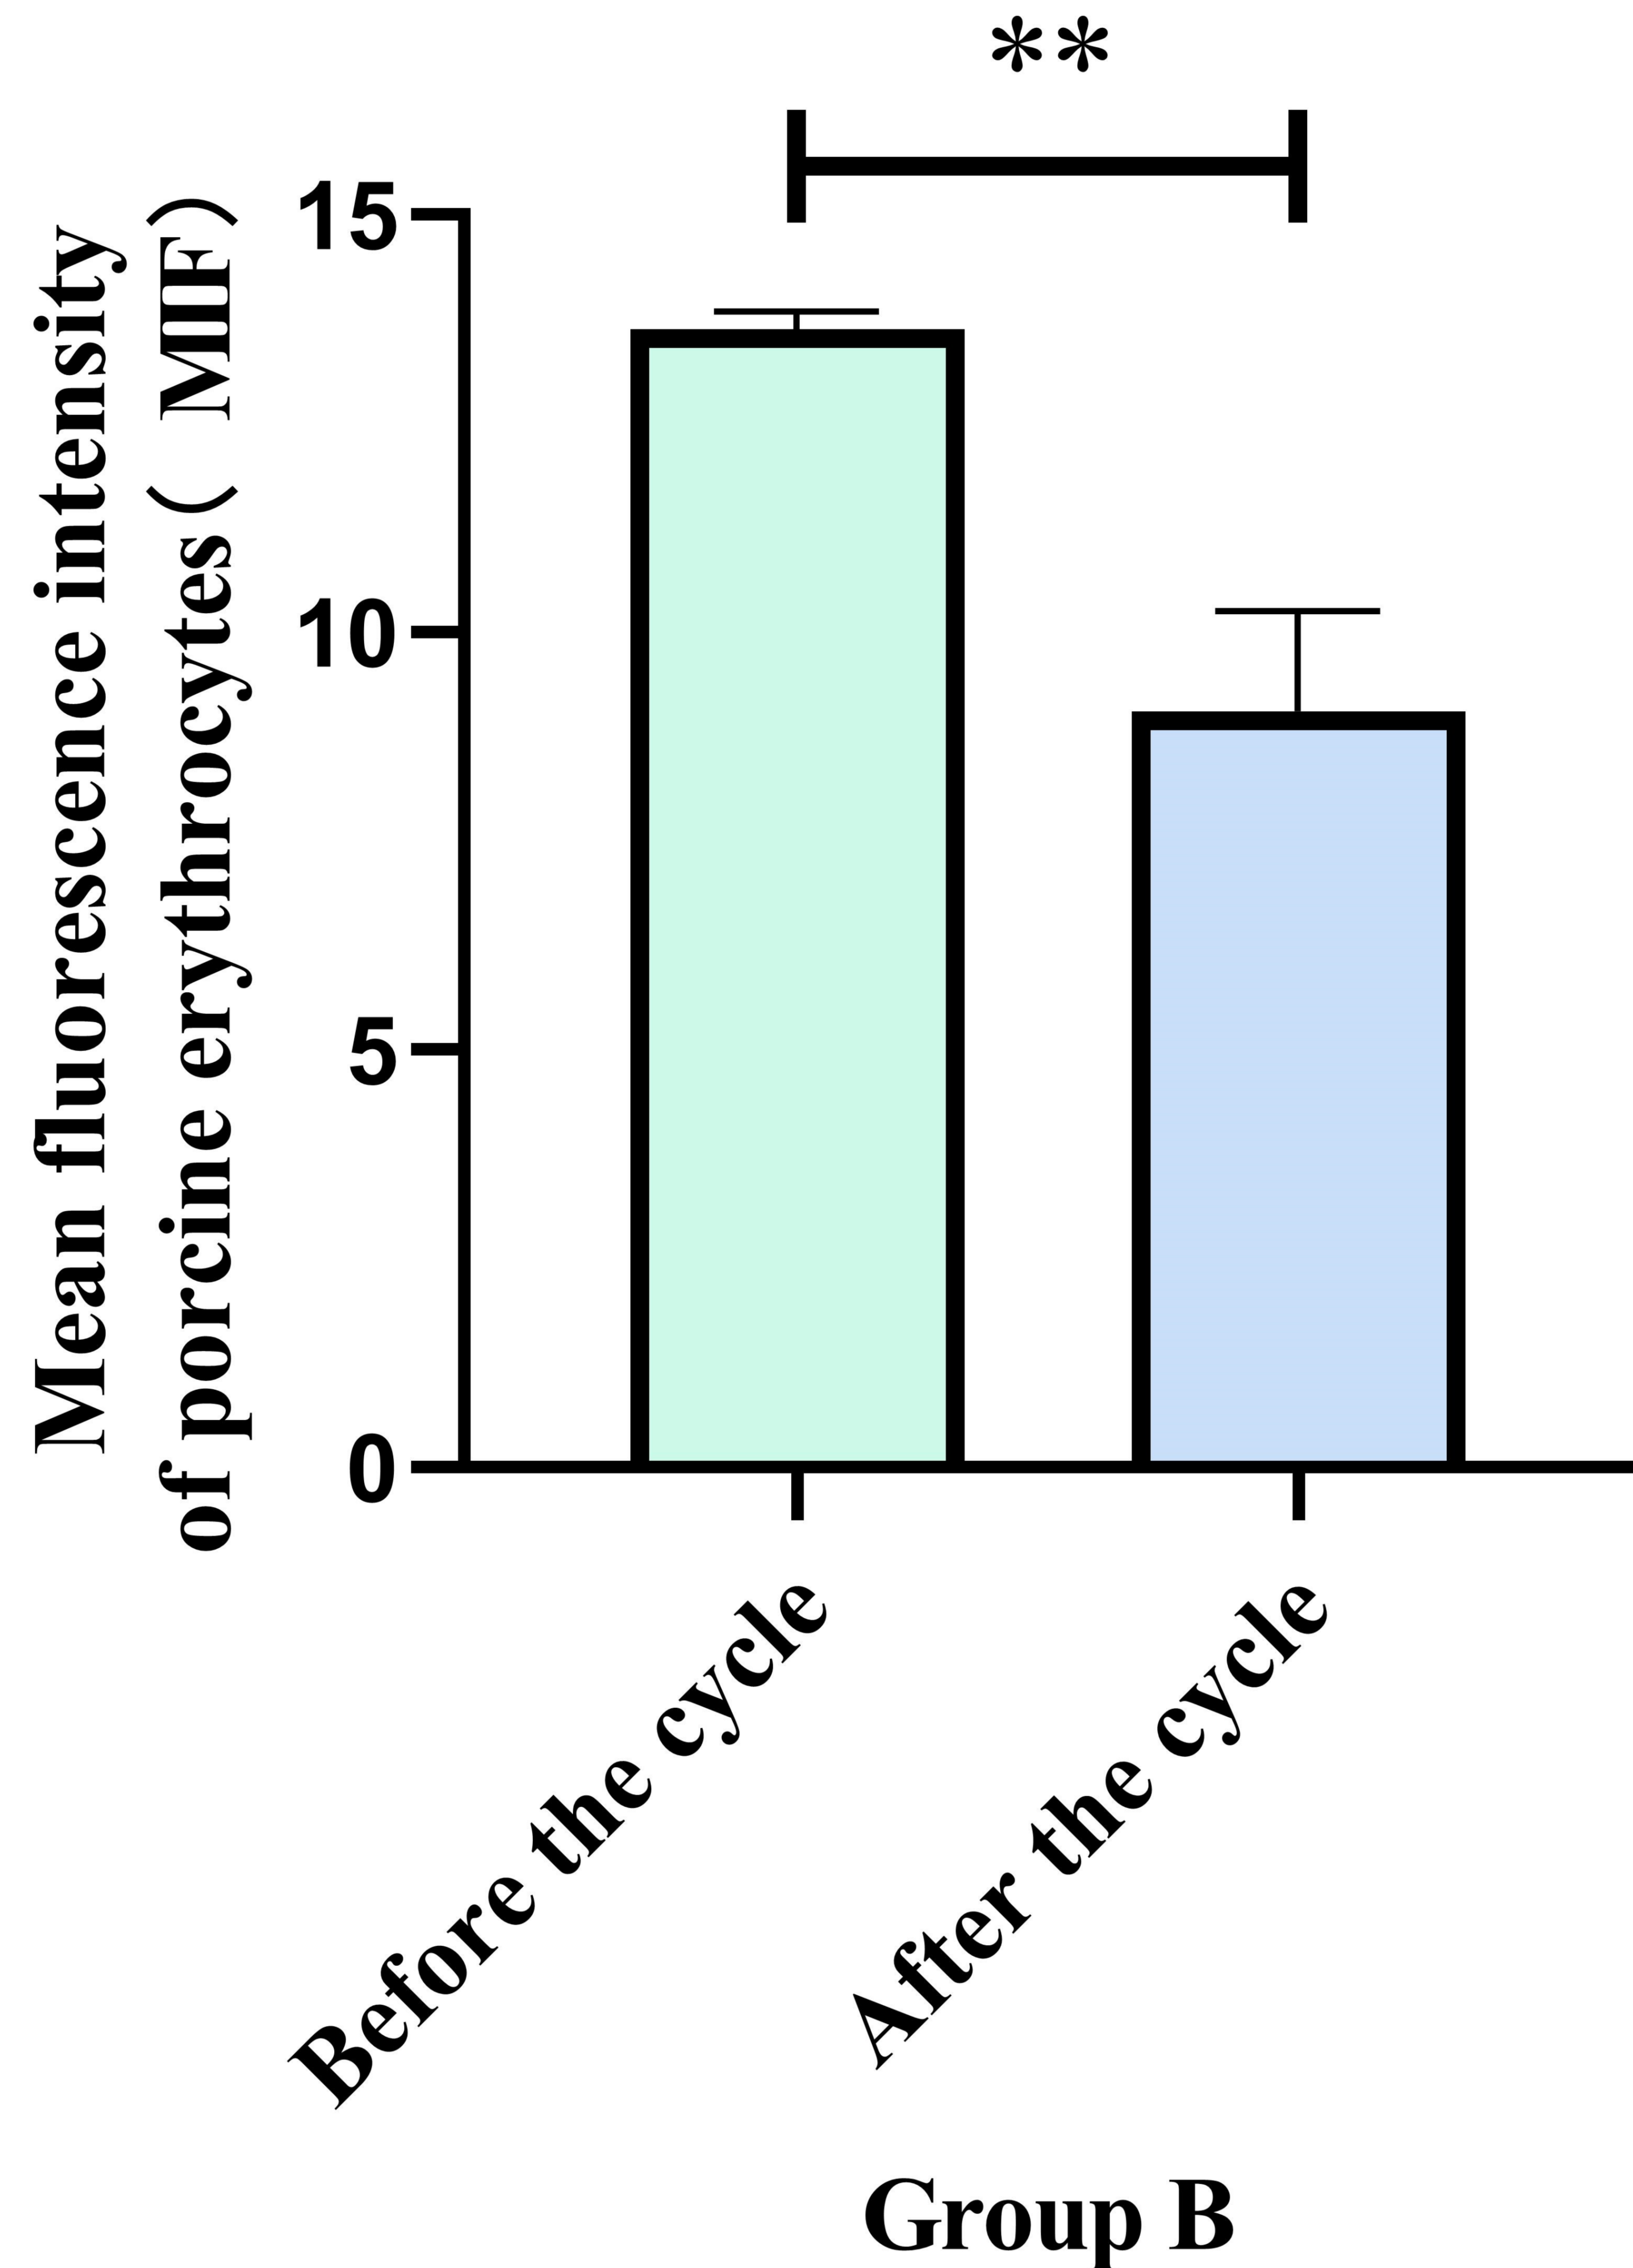

Supplement: Picture_supplement.zip [file Picture_supplement.zip]

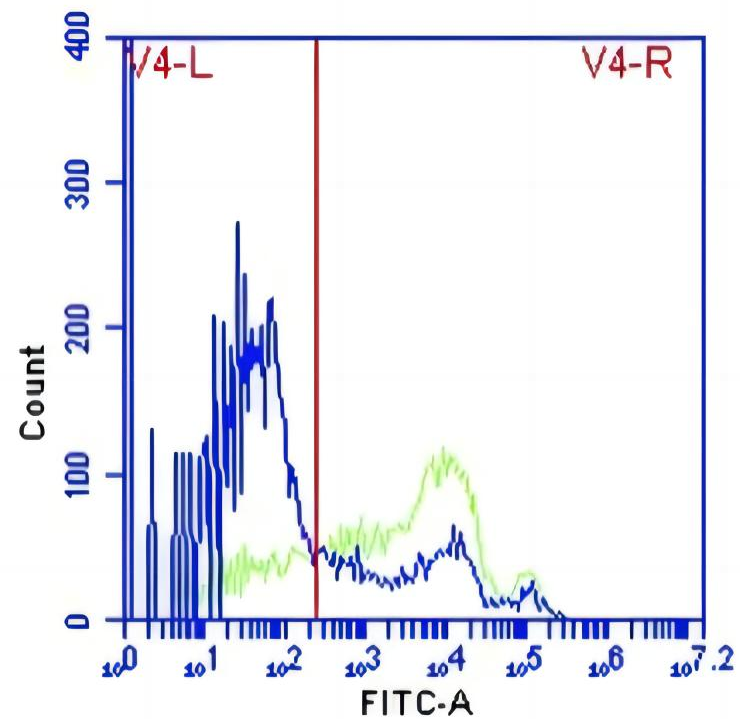

Supplement: Picture_supplement.zip [file Picture_supplement.zip]

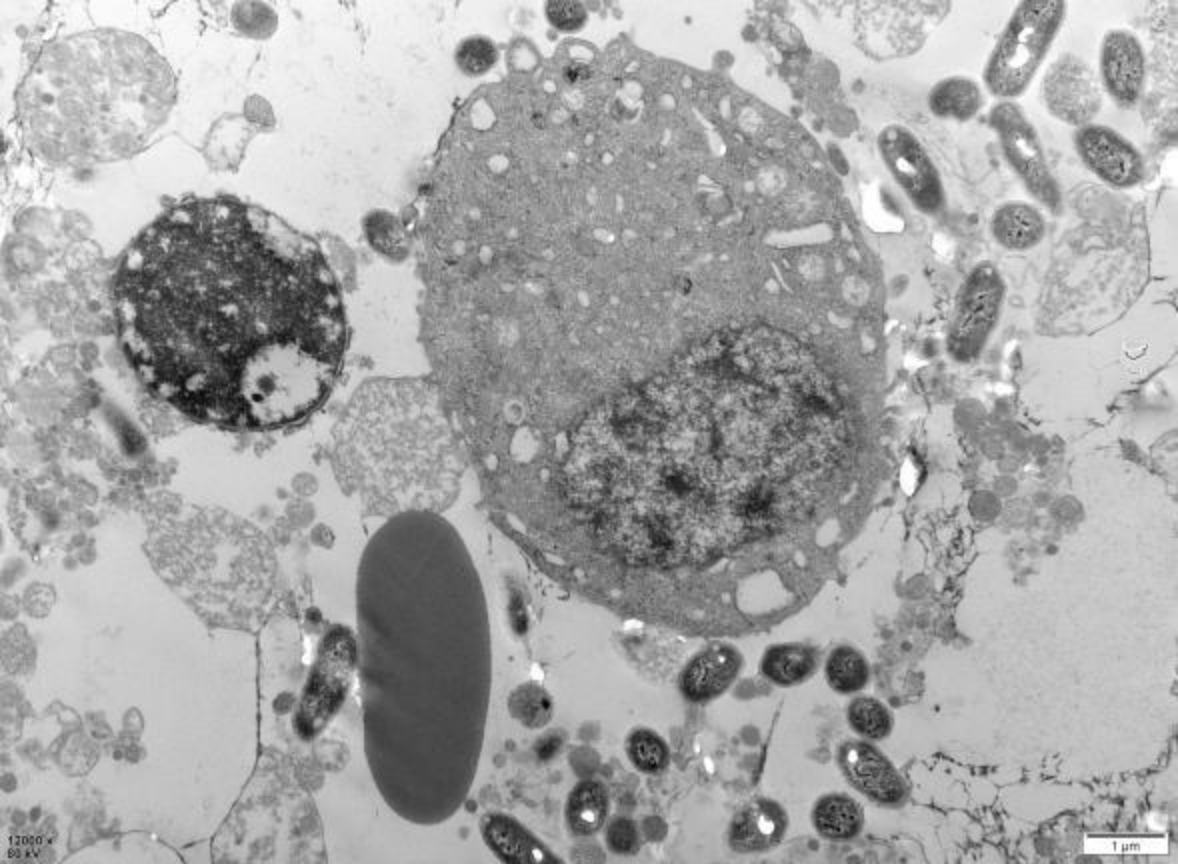

Supplement: Picture_supplement.zip [file Picture_supplement.zip]



Supplement: Picture_supplement.zip [file Picture_supplement.zip]

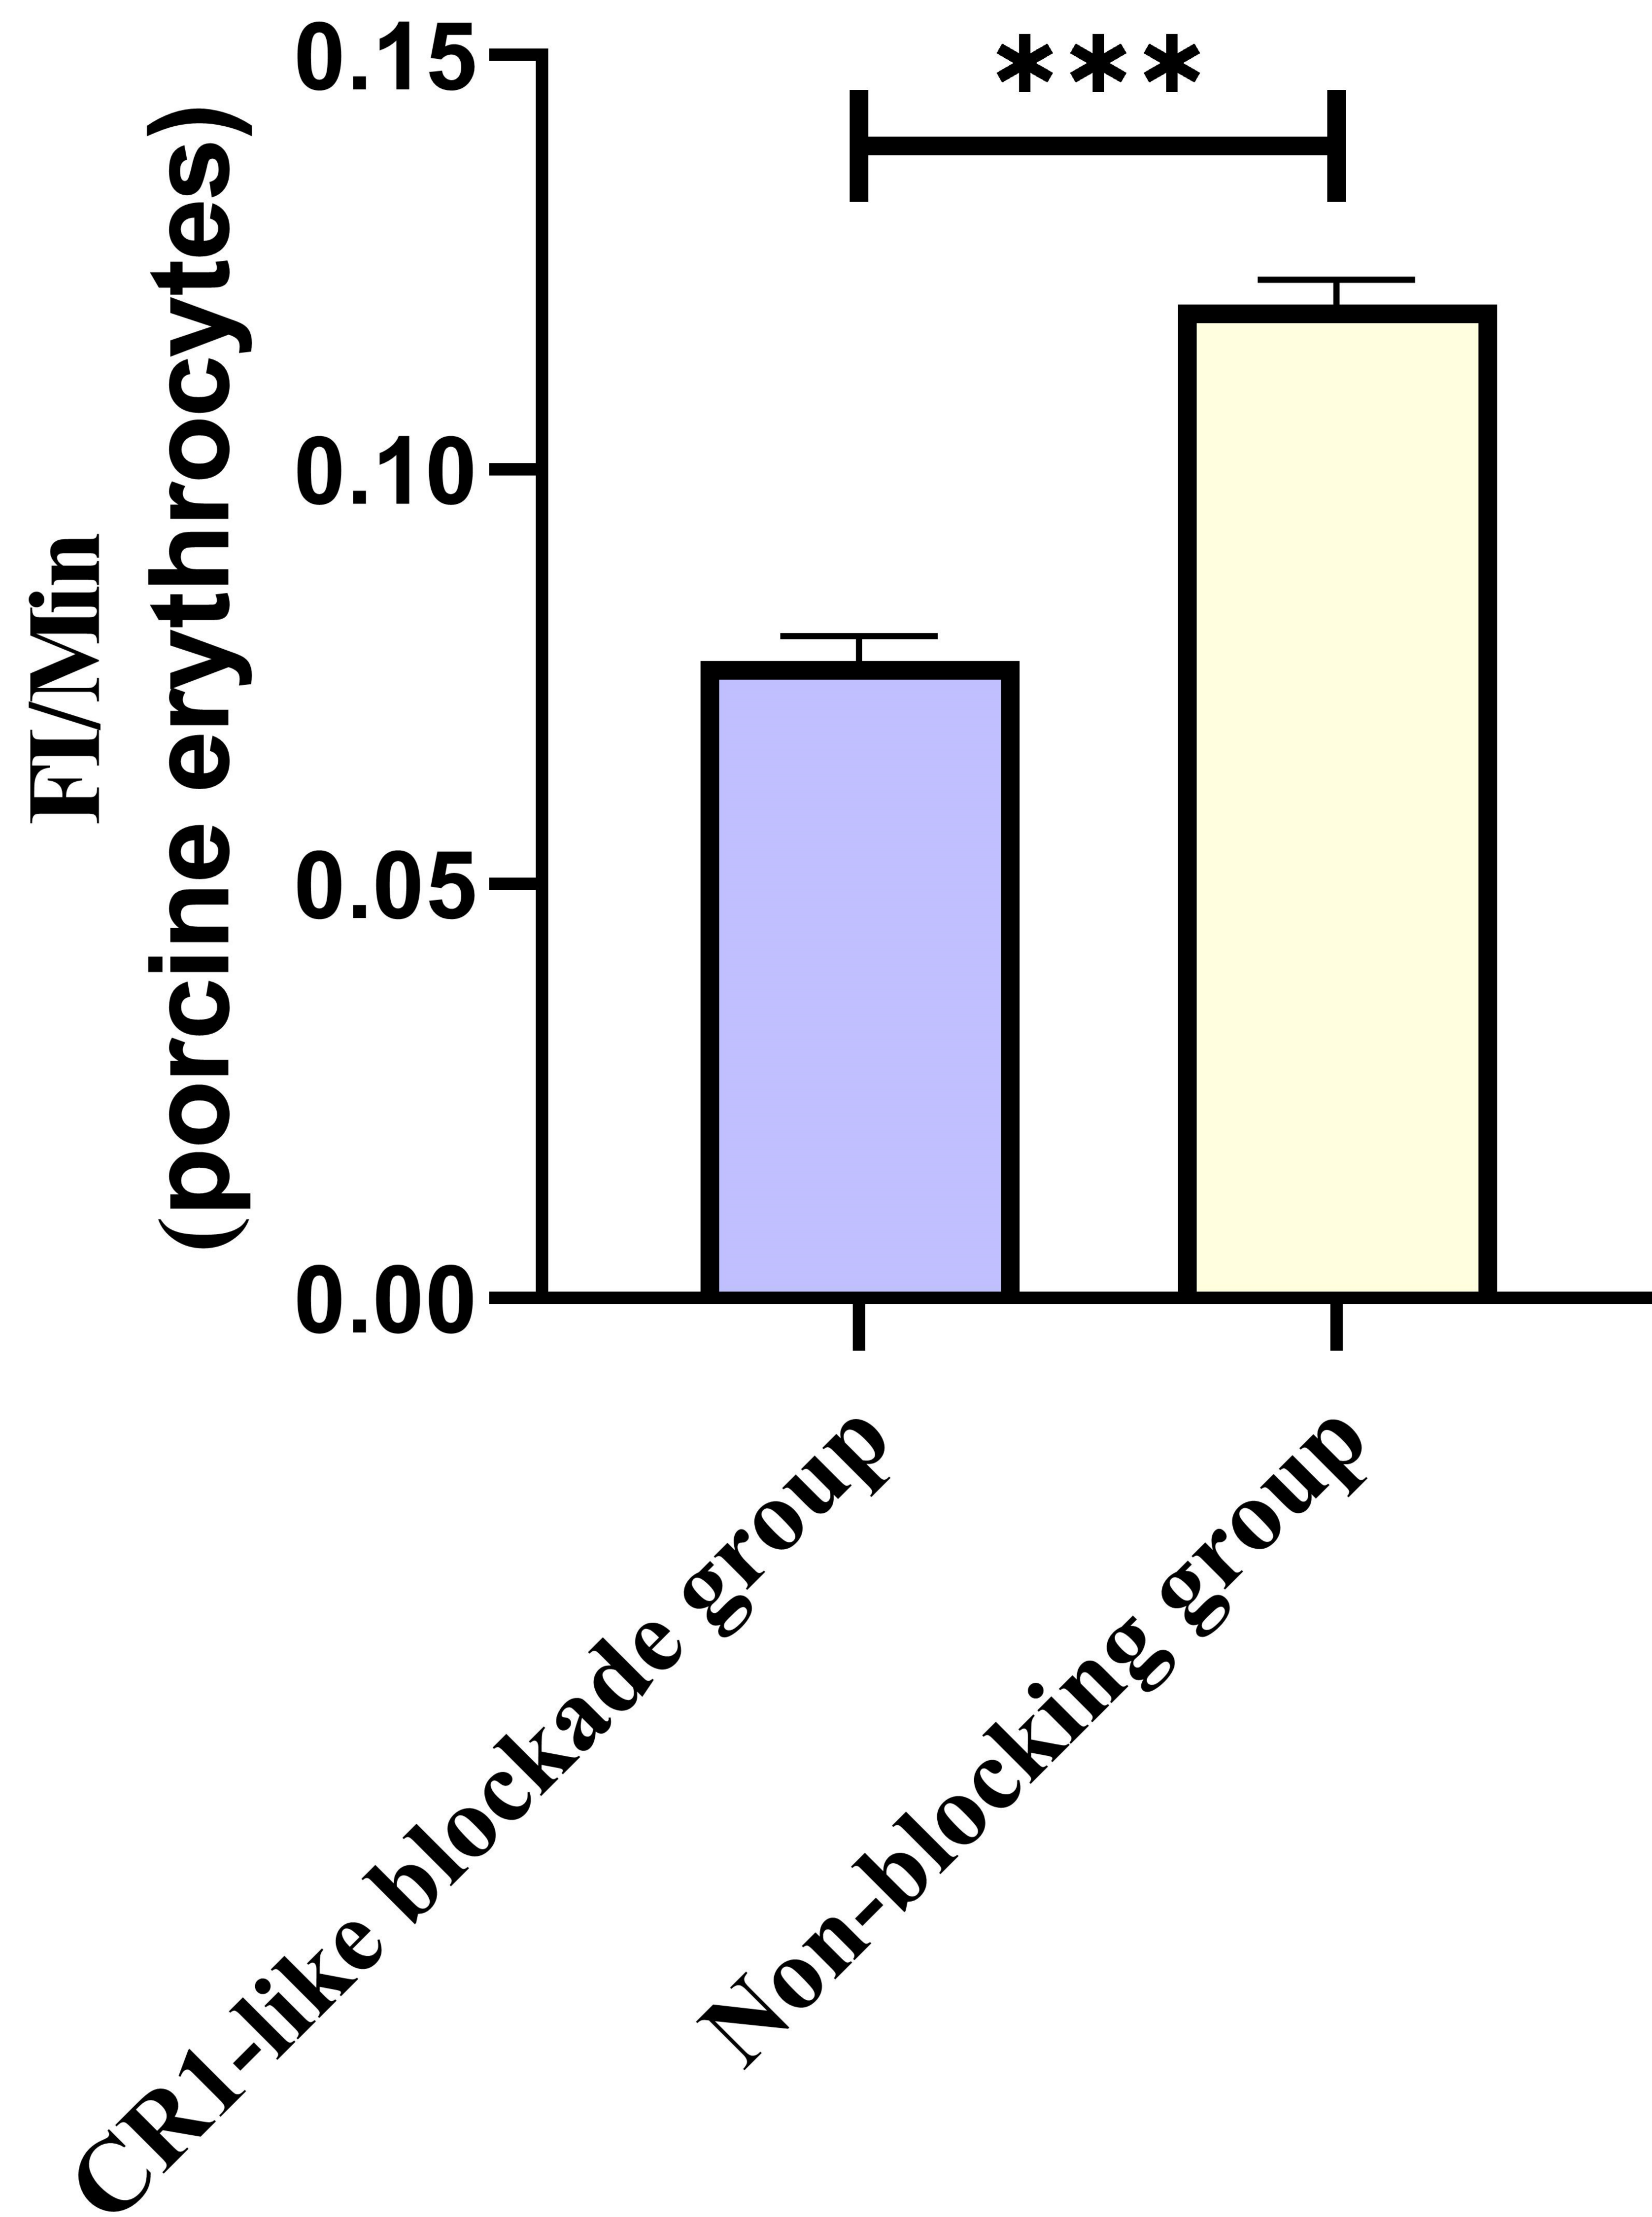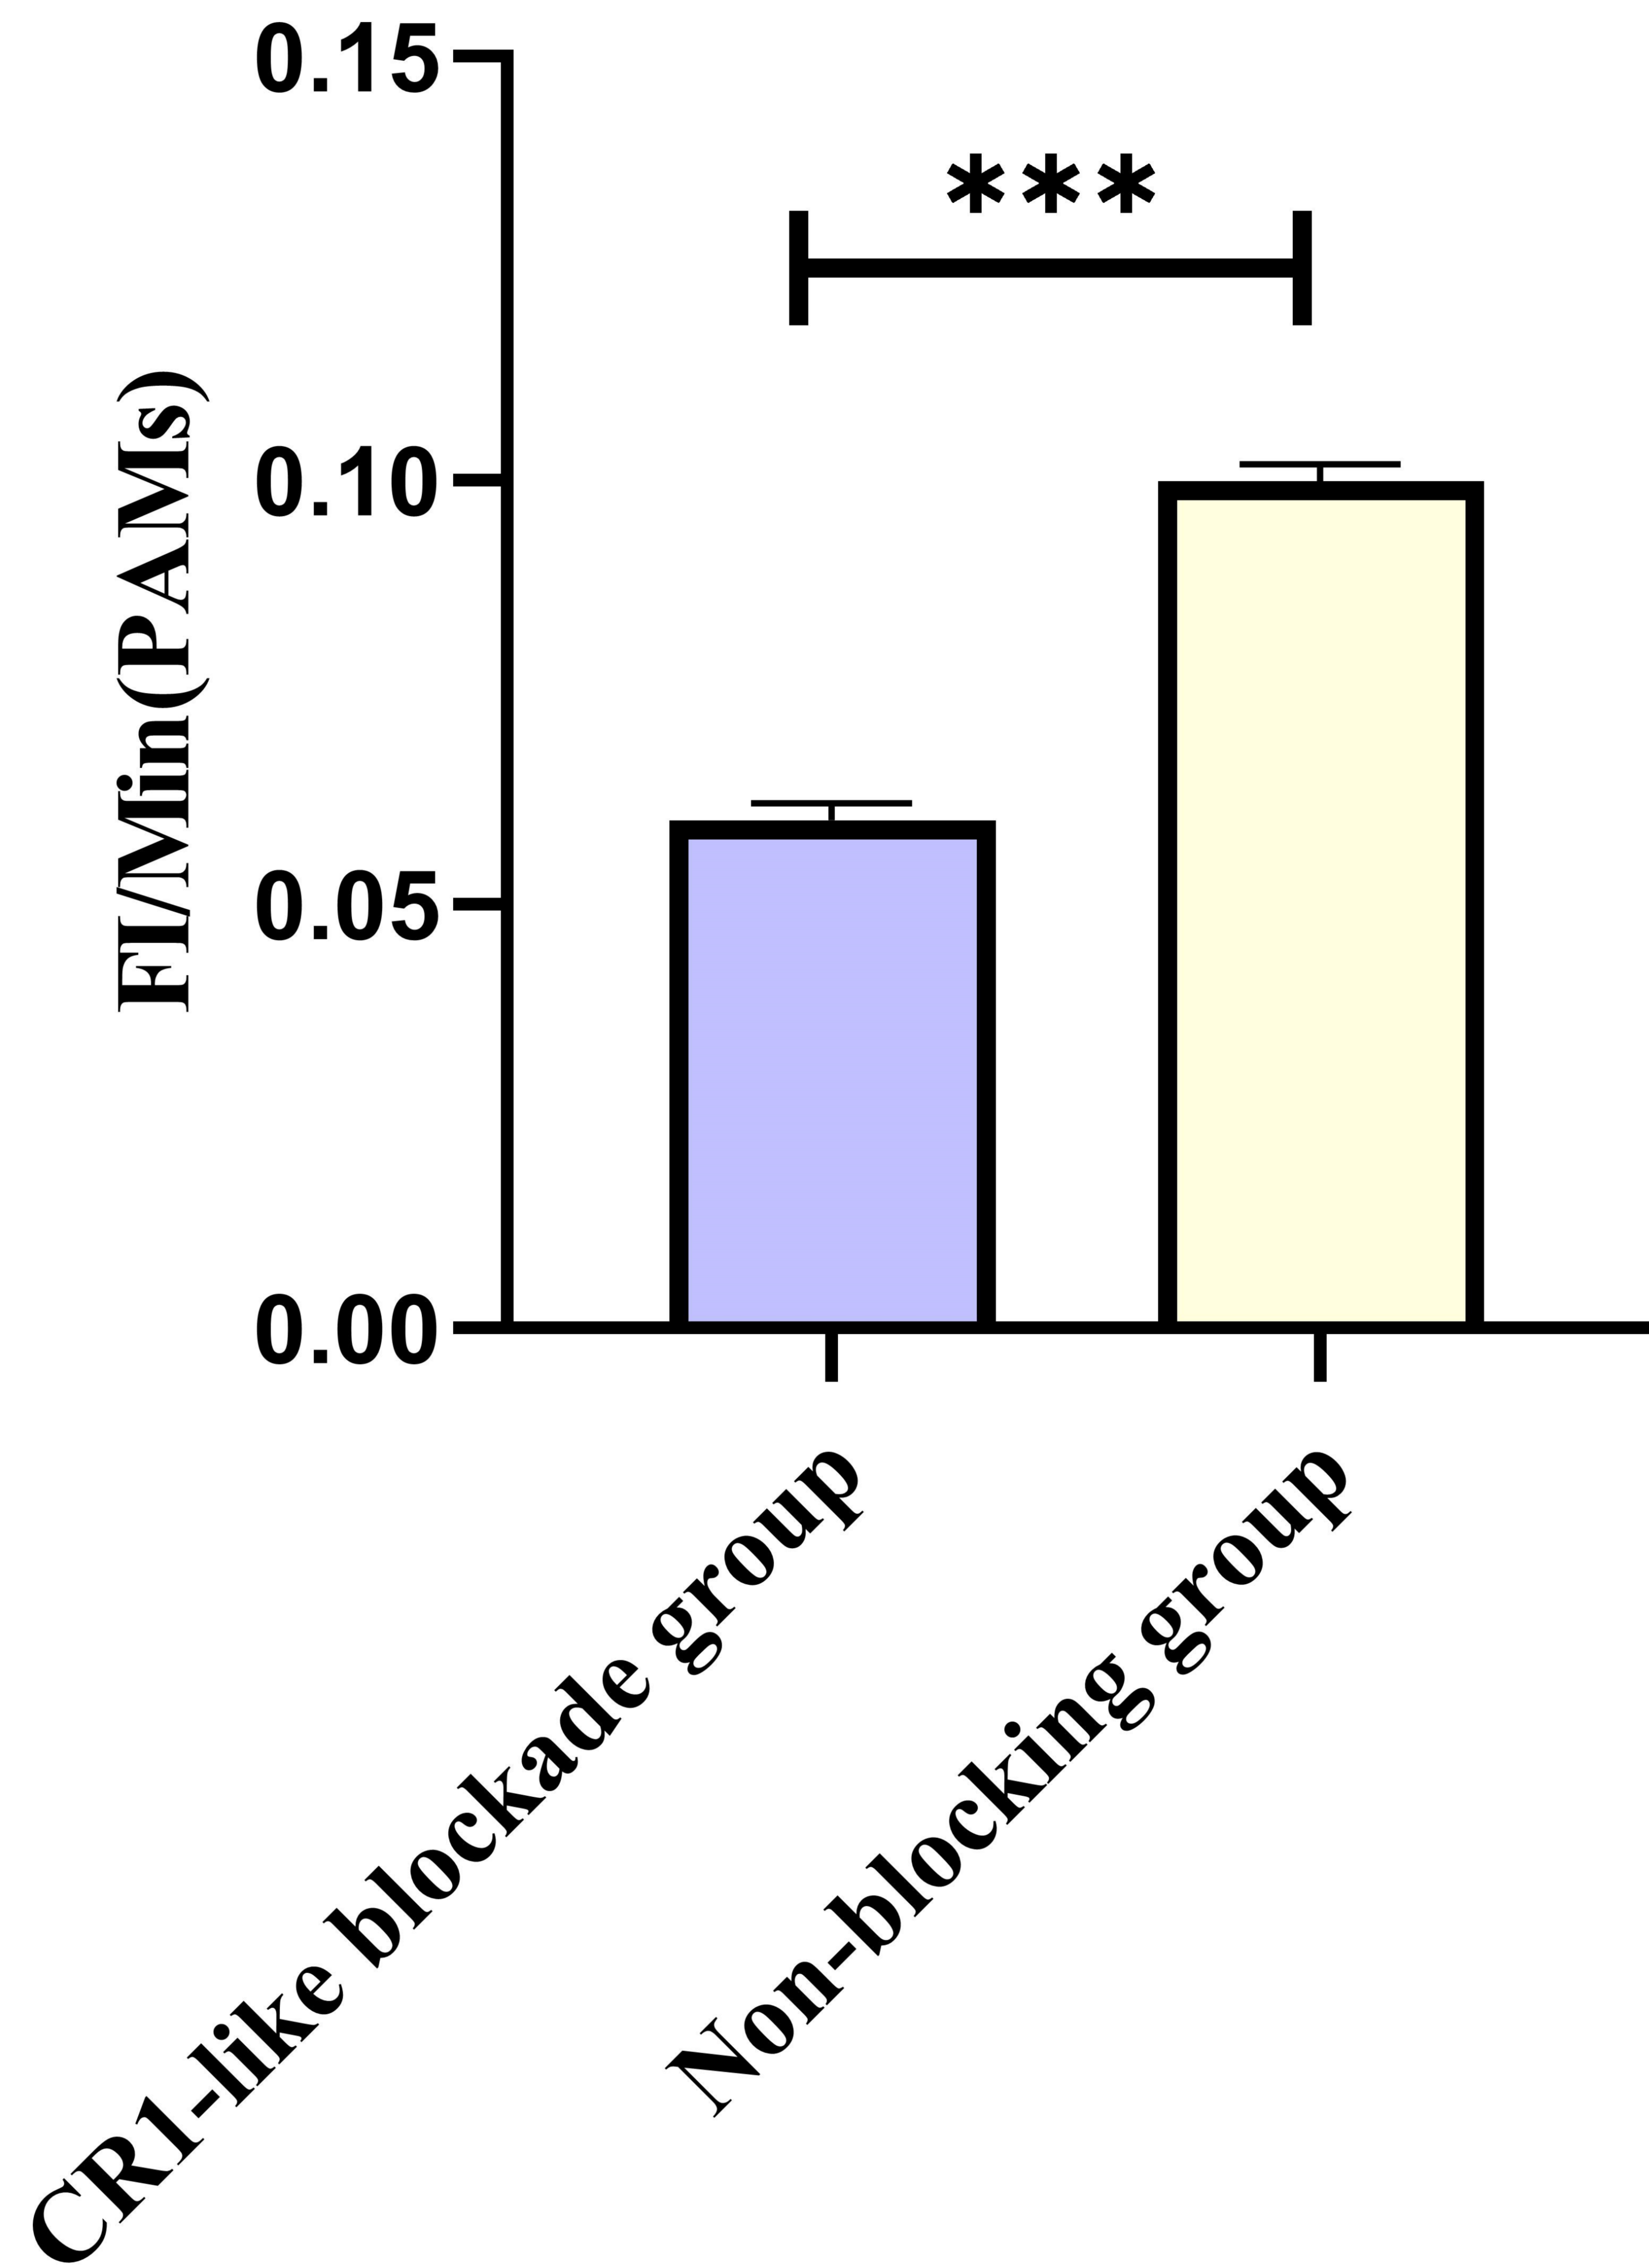

Supplement: Picture_supplement.zip [file Picture_supplement.zip]

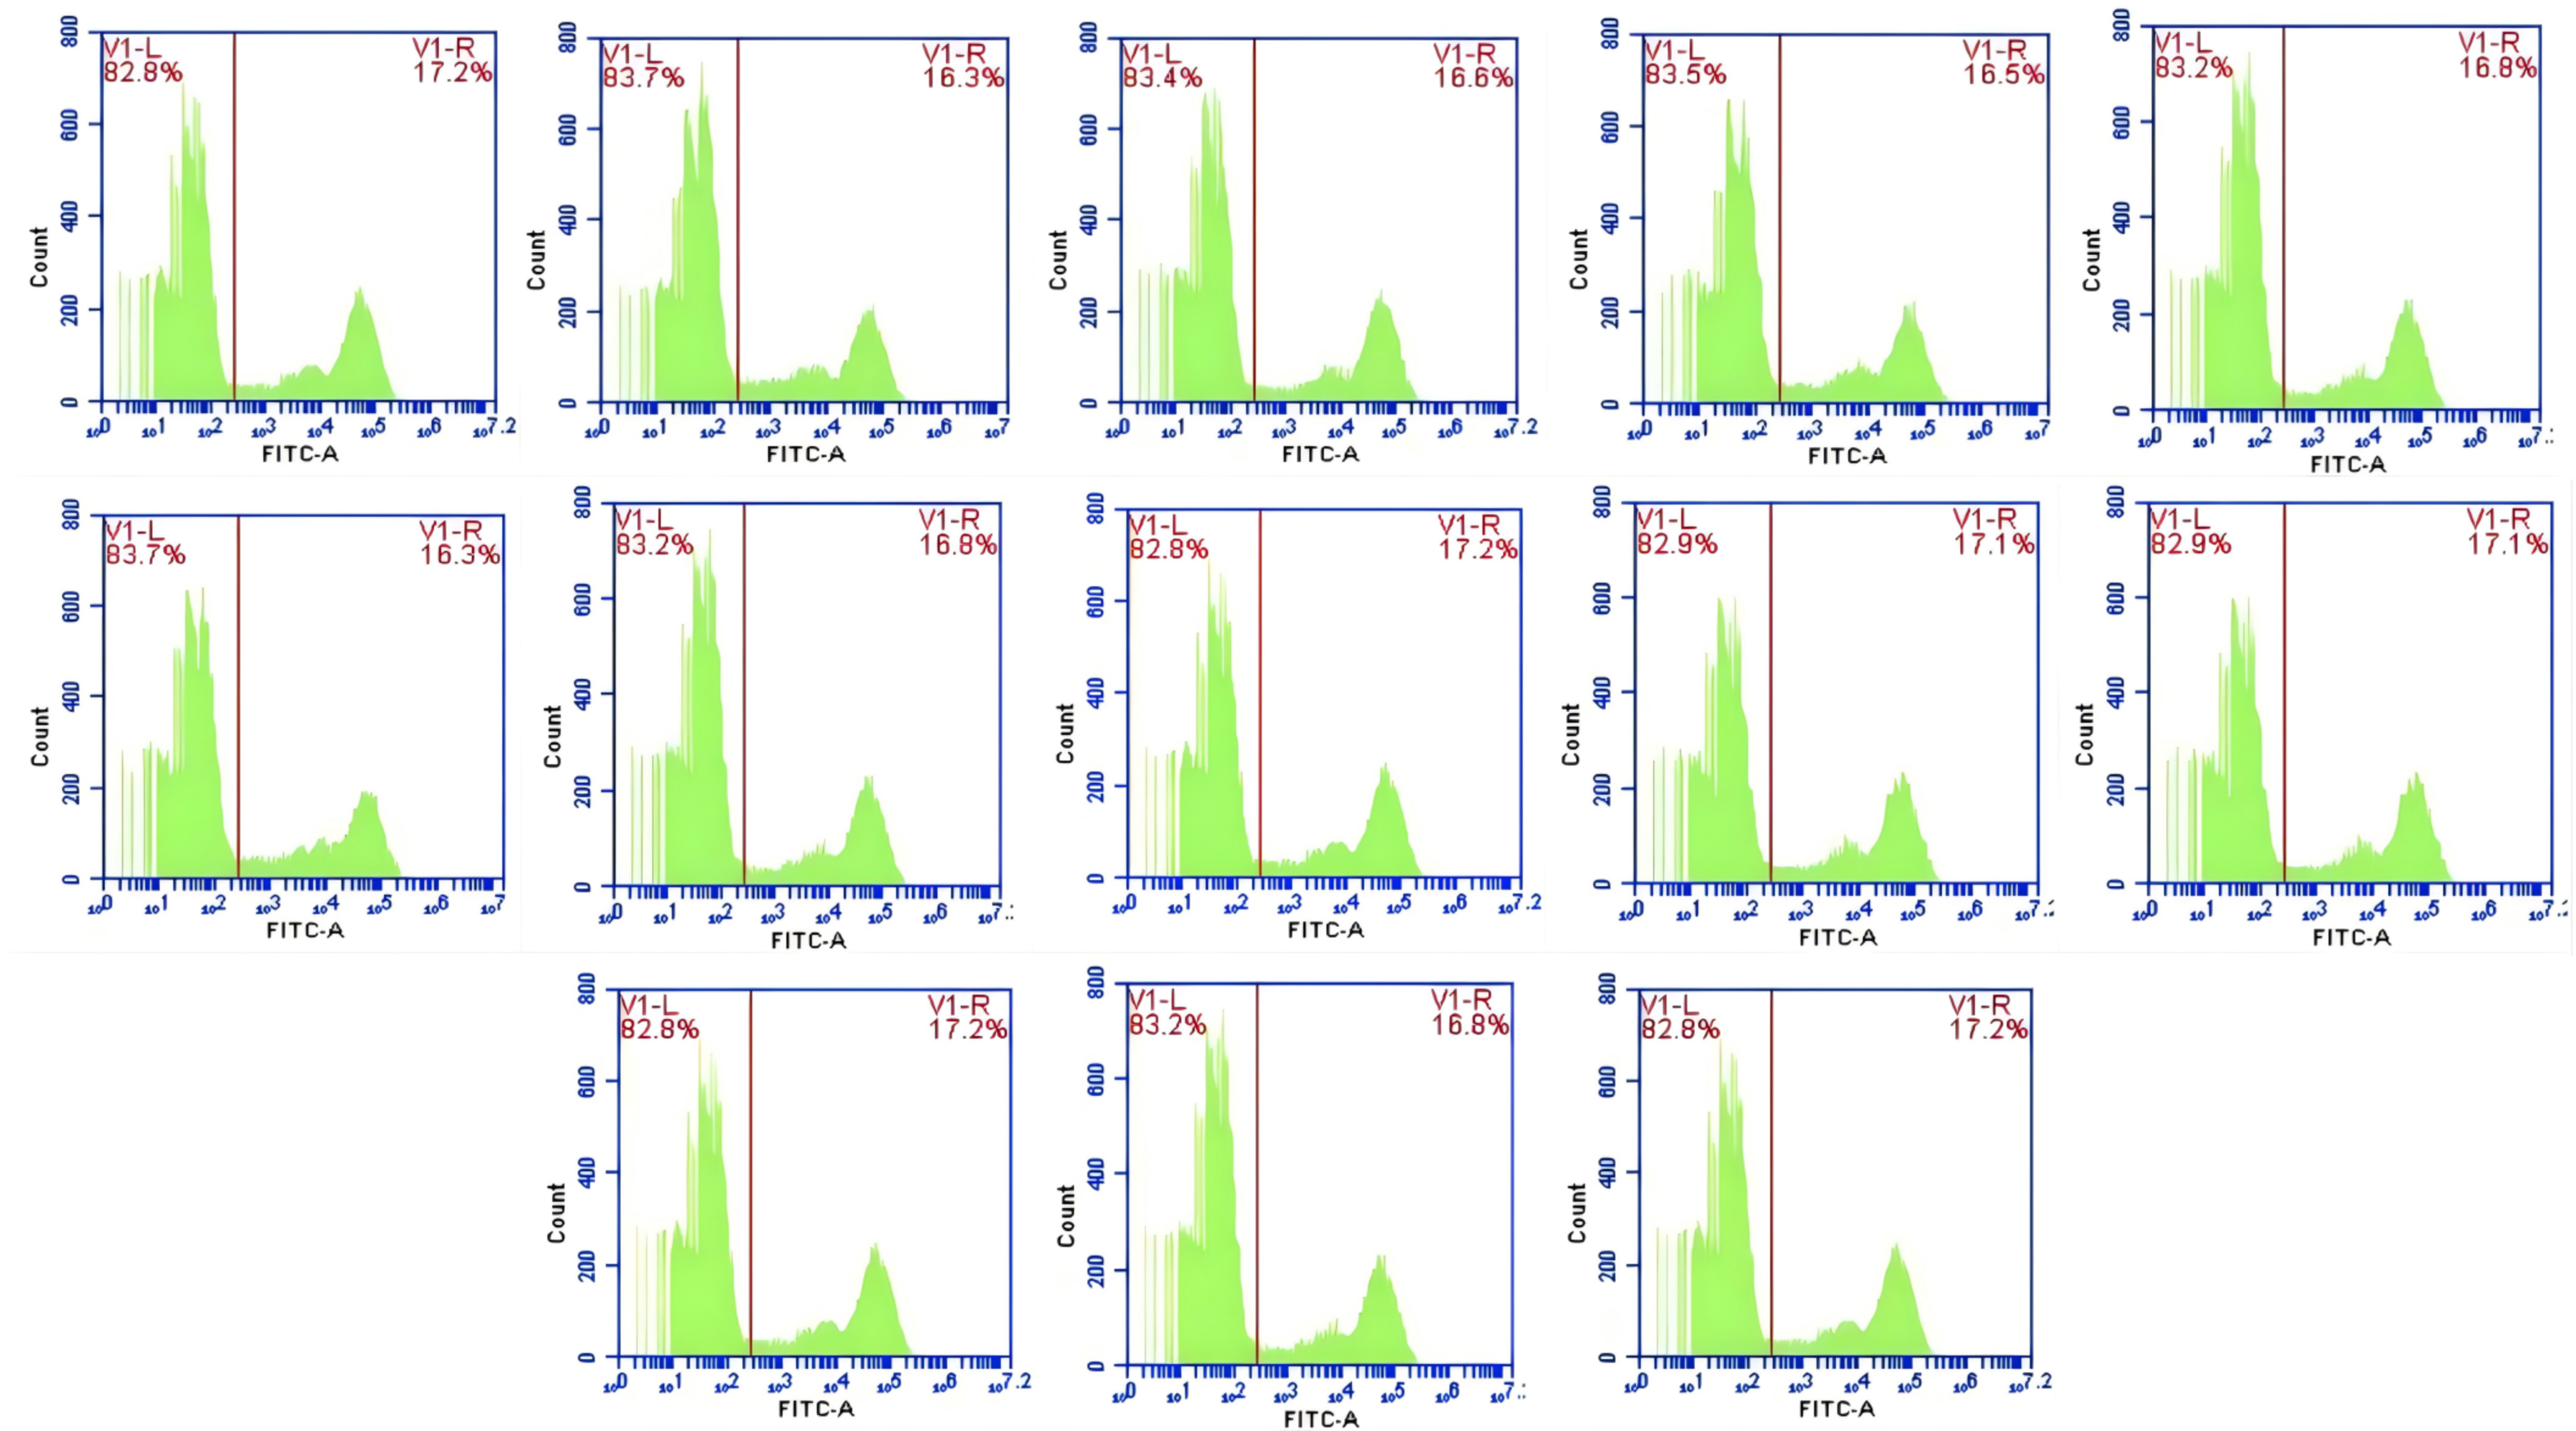

Supplement: Picture_supplement.zip [file Picture_supplement.zip]
